# Supplementary material
Source: PubMed Central journal article supplement (PMC6295192)
Supplement: NIHMS996846-supplement-Appendix_ED_prescribing.pdf [file NIHMS996846-supplement-Appendix_ED_prescribing.pdf]

## **Appendices: Opioid Prescribing for Opioid-Naïve Patients in Emergency Departments and Other Settings**

These appendices provide further detail on methods and supplementary analyses to support the main findings.

1. Comparison of demographics: OLDW and US commercially insured
2. Codes used to identify exclusions for cancer and hospice care
3. Opioid drugs included/excluded
4. Definition of a drug fill
5. Identifying prescription source
6. Calculation of confidence intervals in Table 1
7. Complete list of drugs filled
8. Complete logistic regression results for analyses presented in Table 2
9. Complete results for analysis of guideline concordance predicting long-term use
10. Risk ratios and confidence intervals for risk ratios presented in Figure 2
11. Supplementary analyses
  - a. Time trends in guideline concordance and progression to long-term use
  - b. Comparison of results when limiting analysis to beneficiaries with at least 1 year of follow-up

Appendix 1: Comparison of demographics: OLDW and US commercially insured and Medicare Advantage

**Under 65 privately insured population**

|                 | US privately insured | OLDW commercial |
|-----------------|----------------------|-----------------|
| Race/ethnicity* |                      |                 |
| White           | 72%                  | 73%             |
| Asian           | 6%                   | 5%              |
| Hispanic        | 12%                  | 11%             |
| Black           | 10%                  | 11%             |
| American Indian | <1%                  | N/A             |
| Female          | 50%                  | 49%             |
| Age             |                      |                 |
| 0 to 17         | 24%                  | 24%             |
| 18 to 24        | 11%                  | 10%             |
| 25 to 34        | 16%                  | 16%             |
| 35 to 44        | 15%                  | 18%             |
| 45 to 54        | 17%                  | 18%             |
| 55 to 59        | 9%                   | 8%              |
| 60 to 64        | 7%                   | 6%              |

OLDW commercial includes people with both medical and prescription coverage; excludes people with unknown race/ethnicity, year of birth, or sex  
 \* Source: Kaiser Family Foundation/Urban Institute analysis of CPS ASEC, 2011 data  
 \*\* Source: CPS ASEC, 2015 data

**Medicare Advantage**

|                | US Medicare Advantage | OLDW Medicare Advantage |
|----------------|-----------------------|-------------------------|
| Race/ethnicity |                       |                         |
| White          | 76%                   | 76%                     |
| Black          | 11%                   | 12%                     |
| Hispanic       | 8%                    | 9%                      |
| Other          | 6%                    | 3%                      |
| Female         | 55%                   | 57%                     |

OLDW Medicare Advantage includes people with both medical and prescription coverage; excludes people with unknown race/ethnicity or sex  
 US Medicare Advantage source: Kaiser Family Foundation, 2015 data

## Appendix 2: Codes used to identify exclusions for cancer and hospice care

To limit the analysis to patients with an important risk of long-term opioid use, we excluded patients with active cancer diagnoses or hospice service use.

For the cancer population, we looked at claims for evaluation and management services in the 3 months prior to the index opioid fill. We identified patients with at least two claims on separate days that included a cancer diagnosis. We used Elixhauser comorbidity diagnoses for metastatic cancer or for solid tumors without metastases.<sup>1</sup>

Evaluation and management codes: 99024, 99201, 99202, 99203, 99204, 99205, 99211, 99212, 99213, 99214, 99215, 99217, 99218, 99219, 99220, 99221, 99222, 99223, 99224, 99225, 99226, 99231, 99232, 99233, 99234, 99235, 99236, 99238, 99239, 99241, 99242, 99243, 99244, 99245, 99251, 99252, 99253, 99254, 99255, 99261, 99262, 99263, 99271, 99272, 99273, 99274, 99275, 99281, 99282, 99283, 99284, 99285, 99289, 99290, 99291, 99292, 99293, 99294, 99299, 99300, 99301, 99302, 99303, 99304, 99305, 99306, 99307, 99308, 99309, 99310, 99311, 99312, 99313, 99315, 99316, 99318, 99321, 99322, 99323, 99324, 99325, 99326, 99327, 99328, 99331, 99332, 99333, 99334, 99335, 99336, 99337, 99339, 99340, 99341, 99342, 99343, 99344, 99345, 99347, 99348, 99349, 99350, 99351, 99352, 99353, 99356, 99357, 99358, 99359, 99360, 99361, 99362, 99366, 99367, 99368, 99371, 99372, 99373, 99374, 99375, 99376, 99377, 99378, 99379, 99380, 99415, 99416, 99438, 99441, 99442, 99443, 99444, 99446, 99447, 99448, 99449, 99466, 99467, 99471, 99472, 99475, 99476, 99478, 99479, 99480, 99487, 99488, 99489, 99490, 99495, 99496, 99497, 99498, 99499, 0188T, 0189T, S0257, S0260, S0310

To identify patients receiving hospice services, we looked for at least one claim with either a hospice procedure code or a hospice revenue code in the 3 months prior to the index fill

- Procedure codes: 99377, 99378, G0182, G0337, G9474, G9475, G9476, G9477, G9478, G9479, G9524, Q5001, Q5002, Q5003, Q5004, Q5005, Q5006, Q5007, Q5008, Q5009, Q5010, S0255, S9126, T2042, T2043, T2044, T2045, T2046
- Revenue codes: 115, 0125, 0135, 0145, 0155, 0235, 0650, 0651, 0652, 0653, 0654, 0655, 0656, 0657, 0658, 0659

### Appendix 3: Opioid drugs included/excluded

We identified all opioid drugs present in the table of NDC codes in OptumLabs Data Warehouse. For the purposes of this analysis, we classified tramadol as an opioid. We excluded DEA schedule 5 drugs (codeine cough syrups).

To limit the sample to drugs intended for home use, we excluded any injected or infused drug—those for which the dosage form was vial, syringe, ampule, cartridge, IV solution, etc.

We included only drugs which had a defined dose unit like a tablet, pill, mg/mL, etc. This excludes drugs in powder or bulk form.

We included both single drug formulations and combinations of drugs. Table A1 includes all opioid drug combinations found in the table of NDC codes. Both long-acting and short-acting formulations were included.

Buprenorphine, methadone, and drug combinations including naloxone may be used for both pain management and medication-assisted therapy (MAT) for opioid use disorder. However, in an opioid naïve population, it is highly likely that these medications are being used for MAT. We excluded these drugs from the analysis of opioid naïve prescriptions. However, we did include them when determining whether a person was opioid naïve and in calculating the risk of progression to long-term use.

**Table A1 Opioid drugs and combinations included**

| Opioid                | Drug combinations included             | Not eligible for index fill | Long acting | Short acting |
|-----------------------|----------------------------------------|-----------------------------|-------------|--------------|
| <b>Buprenorphine</b>  | Buprenorphine                          | X                           | X           |              |
|                       | Buprenorphine/Naloxone                 | X                           | X           |              |
| <b>Butorphanol</b>    | Butorphanol                            |                             |             | X            |
| <b>Codeine</b>        | Codeine                                |                             |             | X            |
|                       | Codeine/Acetaminophen                  |                             |             | X            |
|                       | Codeine/Acetaminophen/ Butabarbital    |                             |             | X            |
|                       | Codeine/Acetaminophen/ Butalbital      |                             |             | X            |
|                       | Codeine/Aspirin                        |                             |             | X            |
|                       | Codeine/Aspirin/Butalbital/ Caffeine   |                             |             | X            |
|                       | Codeine/Aspirin/Carisoprodol           |                             |             | X            |
|                       | Codeine/Aspirin/Phenacetin/ Caffeine   |                             |             | X            |
|                       |                                        |                             |             |              |
| <b>Dihydrocodeine</b> | Dihydrocodeine/Acetaminophen/ Caffeine |                             |             | X            |
|                       | Dihydrocodeine/Aspirin/Caffeine        |                             |             | X            |
| <b>Fentanyl</b>       | Fentanyl                               |                             | X           | X            |
| <b>Hydrocodone</b>    | Hydrocodone                            |                             | X           | X            |
|                       | Hydrocodone/Acetaminophen              |                             |             | X            |
|                       | Hydrocodone/Acetaminophen/Diet.Sup.11  |                             |             | X            |
|                       | Hydrocodone/Aspirin                    |                             |             | X            |
|                       | Hydrocodone/Ibuprofen                  |                             |             | X            |
| <b>Hydromorphone</b>  | Hydromorphone                          |                             | X           | X            |
| <b>Levomethadyl</b>   | Levomethadyl                           |                             | X           |              |

| Opioid              | Drug combinations included         | Not eligible for index fill | Long acting | Short acting |
|---------------------|------------------------------------|-----------------------------|-------------|--------------|
| <b>Levorphanol</b>  | Levorphanol                        |                             | X           |              |
| <b>Meperidine</b>   | Meperidine/Acetaminophen           |                             |             | X            |
|                     | Meperidine/Promethazine            |                             |             | X            |
| <b>Methadone</b>    | Methadone                          | X                           | X           |              |
| <b>Morphine</b>     | Morphine Sulfate                   |                             | X           | X            |
|                     | Morphine Sulfate/Naltrexone        |                             | X           |              |
| <b>Opium</b>        | Opium                              |                             |             | X            |
|                     | Opium/Belladonna                   |                             |             | X            |
| <b>Oxycodone</b>    | Oxycodone                          |                             | X           | X            |
|                     | Oxycodone/Acetaminophen            |                             |             | X            |
|                     | Oxycodone/Aspirin                  |                             |             | X            |
|                     | Oxycodone/Ibuprofen                |                             |             | X            |
| <b>Oxymorphone</b>  | Oxymorphone                        |                             | X           | X            |
| <b>Pentazocine</b>  | Pentazocine/Acetaminophen          |                             |             | X            |
|                     | Pentazocine/Aspirin                |                             |             | X            |
|                     | Pentazocine/Naloxone               | X                           |             | X            |
| <b>Propoxyphene</b> | Propoxyphene                       |                             |             | X            |
|                     | Propoxyphene/Acetaminophen         |                             |             | X            |
|                     | Propoxyphene/Aspirin/Caffeine      |                             |             | X            |
| <b>Tapentadol</b>   | Tapentadol                         |                             | X           | X            |
| <b>Tramadol</b>     | Tramadol                           |                             | X           | X            |
|                     | Tramadol/Acetaminophen             |                             |             | X            |
|                     | Tramadol/Dietary Supplement No. 11 |                             |             | X            |

#### Appendix 4: Definition of a opioid fill

An opioid fill was defined as a drug dispensed on a single day to an individual beneficiary by a single prescriber. Here, *drug* is defined by the opioid ingredient and formulation type: for example, all short-acting hydrocodone prescriptions filled on the same day with the same prescriber ID for the same individual would be counted as one fill. The total MME amount dispensed for each drug/person/prescriber combination is summed and divided by the maximum days supply across the prescriptions. Examples:

| Patient | Prescriber | Date     | Drug        | Formulation | Total MME | Days supply |
|---------|------------|----------|-------------|-------------|-----------|-------------|
| 1       | 10         | 1/1/2011 | Hydrocodone | SA          | 50        | 2           |
| 1       | 10         | 1/1/2011 | Hydrocodone | SA          | 100       | 10          |
| 1       | 15         | 1/1/2011 | Hydrocodone | LA          | 50        | 5           |
| 2       | 10         | 1/1/2011 | Oxycodone   | SA          | 50        | 5           |
| 2       | 15         | 1/1/2011 | Oxycodone   | SA          | 50        | 10          |

Patient 1 has 2 fills on 1/1/2011

1. 150 MME of SA Hydrocodone with a days supply of 10=15 MME per day
2. 50 MME of LA Hydrocodone with a days supply of 5=10 MME per day

Patient 2 has 2 fills on 1/1/2011:

1. 50 MME of SA Oxycodone with a days supply of 5 from prescriber 10=10 MME per day
2. 50 MME of SA Oxycodone with a days supply of 10 from prescriber 15=5 MME per day

## Appendix 5: Determining prescription source

To determine the source of an opioid fill, we attempt to link a prescription claim to a medical claim representing the encounter where the beneficiary received the prescription. Because opioids are scheduled drugs, we expect that in most cases, the prescriber will see the patient in person before writing the prescription. As of 2013, 41 states and Washington, DC, had state laws requiring physical examinations in relation to prescriptions for a controlled substance.<sup>2</sup>

To find the visit that generated a prescription, we look for all medical claims in the 30 days prior to and including the date a prescription was filled. We used revenue and procedure codes identified by the National Committee for Quality Assurance (NCQA) to find inpatient, outpatient, and ED visits (except code 92888, used for physician consultation with EMS).<sup>3</sup> We used revenue codes to identify ambulatory surgery services, and Current Procedural Terminology (CPT) codes to identify dental services. All other procedures and visits that were not classified as inpatient, outpatient, ED, ambulatory surgery, or dental services were captured and labeled “other” services. This category includes laboratory tests, imaging, physical therapy, chiropractic care, etc.

We identified inpatient, outpatient, ED, ambulatory surgery, or dental visit in the 30 days up to and including the index fill date. We attempted to match the provider ID these visits to the prescriber ID on the pharmacy claim. If we found a matching visit, we assigned that visit as the most likely source of the prescription

(N=1,590,929; 30.3% of fills with any visit within 30 days). Due to limitations in the OLDW at the time the study was completed, we were unable to match prescriber IDs to medical claims physician IDs for Medicare Advantage beneficiaries.

If no visits were found with a provider ID matching the prescription, we assigned the most proximal visit as the source of the prescription. If no visits were found within 30 days of the index fill, but other services were present (for example, laboratory tests or imaging), we considered the prescription to have an unknown source. Of all prescriptions with a known source, 72% were filled on the same day as the visit, 85% within 3 days, and 90% within one week.

Once we identified the visit considered the most likely source of the fill, we classified the most likely source of each index fill as 1) ED visit only; 2) non-ED visit only, which combines inpatient, outpatient, ambulatory surgery, and dental/accidental dental; 3) unknown source. The unknown source category included both fills with no visit in the prior 30 days and fills where the beneficiary had both an ED visit and a non-ED visit on the same day.

A substantial proportion of prescriptions fall into the unknown source category: 26% for the Commercial population and 15-16% for the Medicare population; most of these fills were classified as unknown due to having no visit in the prior 30 days. Another study using a different source of commercial claims found a similarly high rate of prescriptions that could not be matched to a visit: 28%



unmatched with a look back period of 2 weeks (vs. 30 days for this study).<sup>4</sup> Some of these prescriptions were likely written by dentists, who have been estimated to write 6.4% of opioid prescriptions.<sup>5</sup> We did not observe most dental visits, as dentistry is not included in medical insurance benefits. In our sample of fills to opioid-naïve patients, 7.0% of fills with a known prescriber specialty were written by a dentist or other dental specialist. We present the results for prescriptions with unknown source throughout, but do not focus on the interpretation of this group of prescriptions.

Appendix 6: Calculation of confidence intervals in Table 1

| Measure                                                                                                                                                                                                                                                                                                                                                                                                | Confidence interval calculation/statistical tests                     |
|--------------------------------------------------------------------------------------------------------------------------------------------------------------------------------------------------------------------------------------------------------------------------------------------------------------------------------------------------------------------------------------------------------|-----------------------------------------------------------------------|
| <ul style="list-style-type: none"> <li>• Naïve opioid fills per covered person per year of insurance coverage</li> <li>• Total opioid fills per covered person per year of insurance coverage</li> <li>• Mean number of comorbidities</li> </ul>                                                                                                                                                       | Mean calculated with Poisson exact confidence interval                |
| <ul style="list-style-type: none"> <li>• Sex</li> <li>• Race/ethnicity</li> <li>• Prescription source</li> <li>• Insurance coverage after fill (3 mos, 6 mos, 12 mos)</li> <li>• Had any claims in (3 mos, 6 mos) before fill</li> <li>• Any comorbidity</li> <li>• Drug filled</li> <li>• DEA class</li> <li>• Greater than (50 MME, 90 MME, 3 days, 7 days)</li> <li>• Chronic opioid use</li> </ul> | Confidence intervals for proportions calculated using logit transform |
| Age                                                                                                                                                                                                                                                                                                                                                                                                    | N/A: Median with inter-quartile range                                 |

Appendix 7: Drug filled—complete list

| Opioids          | Commercial |             | Aged Medicare |             | Disabled Medicare |             |
|------------------|------------|-------------|---------------|-------------|-------------------|-------------|
|                  | % of fills | 95 CI       | % of fills    | 95 CI       | % of fills        | 95 CI       |
| Hydrocodone SA   | 58.9       | (58.9,59.0) | 49.2          | (49.1,49.4) | 49.7              | (49.3,50.0) |
| Oxycodone SA     | 18.8       | (18.8,18.8) | 16.6          | (16.6,16.7) | 19.4              | (19.1,19.7) |
| Tramadol SA      | 8.7        | (8.7,8.7)   | 20.2          | (20.1,20.3) | 18.7              | (18.5,19.0) |
| Codeine          | 9.8        | (9.8,9.9)   | 8.6           | (8.5,8.7)   | 7.2               | (7.0,7.4)   |
| Propoxyphene     | 2.3        | (2.3,2.3)   | 2.4           | (2.4,2.5)   | 2.0               | (1.9,2.1)   |
| Morphine SA      | <0.1       | (<0.1,<0.1) | 1.4           | (1.4,1.5)   | 0.5               | (0.4,0.5)   |
| Hydromorphone SA | 0.4        | (0.4,0.4)   | 0.6           | (0.5,0.6)   | 0.8               | (0.8,0.9)   |
| Oxycodone LA     | 0.2        | (0.2,0.2)   | 0.3           | (0.3,0.3)   | 0.4               | (0.4,0.5)   |
| Morphine LA      | 0.1        | (0.1,0.1)   | 0.1           | (0.1,0.1)   | 0.5               | (0.4,0.5)   |
| Meperidine       | 0.4        | (0.4,0.4)   | 0.1           | (0.1,0.1)   | 0.1               | (0.1,0.2)   |
| Fentanyl LA      | <0.1       | (<0.1,<0.1) | 0.3           | (0.3,0.3)   | 0.3               | (0.3,0.3)   |
| Tramadol LA      | 0.1        | (0.1,0.1)   | 0.1           | (0.1,0.1)   | 0.1               | (0.1,0.2)   |
| Tapentadol SA    | 0.1        | (0.1,0.1)   | <0.1          | (<0.1,<0.1) | <0.1              | (<0.1,<0.1) |
| Oxymorphone LA   | <0.1       | (<0.1,<0.1) | <0.1          | (<0.1,<0.1) | 0.1               | (0.1,0.1)   |
| Pentazocine      | <0.1       | (<0.1,<0.1) | <0.1          | (<0.1,<0.1) | <0.1              | (<0.1,<0.1) |
| Butorphanol      | <0.1       | (<0.1,<0.1) | <0.1          | (<0.1,<0.1) | <0.1              | (<0.1,<0.1) |
| Opium            | <0.1       | (<0.1,<0.1) | <0.1          | (<0.1,<0.1) | <0.1              | (<0.1,<0.1) |
| Tapentadol LA    | <0.1       | (<0.1,<0.1) | <0.1          | (<0.1,<0.1) | <0.1              | (<0.1,<0.1) |
| Oxymorphone SA   | <0.1       | (<0.1,<0.1) | <0.1          | (<0.1,<0.1) | <0.1              | (<0.1,<0.1) |
| Dihydrocodeine   | <0.1       | (<0.1,<0.1) | <0.1          | (<0.1,<0.1) | <0.1              | (<0.1,<0.1) |
| Hydromorphone LA | <0.1       | (<0.1,<0.1) | <0.1          | (<0.1,<0.1) | <0.1              | (<0.1,<0.1) |
| Levorphanol      | <0.1       | (<0.1,<0.1) | <0.1          | (<0.1,<0.1) | <0.1              | (<0.1,<0.1) |
| Hydrocodone LA   | <0.1       | (<0.1,<0.1) | <0.1          | (<0.1,<0.1) | <0.1              | (<0.1,<0.1) |
| Fentanyl SA      | <0.1       | (<0.1,<0.1) | <0.1          | (<0.1,<0.1) | <0.1              | (<0.1,<0.1) |

Appendix 8: Complete logistic regression results for analyses presented in Table 2

| Table A2                              | Prescription characteristics |                        |                        |                        |                           |                        |
|---------------------------------------|------------------------------|------------------------|------------------------|------------------------|---------------------------|------------------------|
|                                       | (1)<br>>3 days               | (2)<br>>7 days         | (3)<br>>50 MME         | (4)<br>>90 MME         | (5)<br>Long-acting        | (6)<br>Long-term use   |
| <b>Beneficiary population</b>         |                              |                        |                        |                        |                           |                        |
| Commercial                            | 1<br>[1,1]                   | 1<br>[1,1]             | 1<br>[1,1]             | 1<br>[1,1]             | 1<br>[1,1]                | 1<br>[1,1]             |
| Aged Medicare                         | 0.967<br>[0.956,0.978]       | 1.022<br>[1.010,1.034] | 0.929<br>[0.917,0.941] | 0.771<br>[0.754,0.788] | 0.756<br>[0.713,0.803]    | 1.701<br>[1.653,1.751] |
| Disabled Medicare                     | 1.297<br>[1.270,1.323]       | 1.942<br>[1.908,1.977] | 0.754<br>[0.737,0.771] | 0.882<br>[0.851,0.915] | 1.700<br>[1.585,1.822]    | 4.465<br>[4.332,4.601] |
| <b>Treatment setting</b>              |                              |                        |                        |                        |                           |                        |
| Non-ED                                | 1<br>[1,1]                   | 1<br>[1,1]             | 1<br>[1,1]             | 1<br>[1,1]             | 1<br>[1,1]                | 1<br>[1,1]             |
| Unknown source                        | 0.459<br>[0.456,0.461]       | 0.350<br>[0.347,0.353] | 0.690<br>[0.685,0.694] | 0.593<br>[0.586,0.600] | 0.651<br>[0.624,0.680]    | 0.613<br>[0.597,0.630] |
| ED                                    | 0.300<br>[0.298,0.302]       | 0.132<br>[0.130,0.134] | 0.557<br>[0.553,0.561] | 0.438<br>[0.432,0.445] | 0.0799<br>[0.0702,0.0911] | 0.535<br>[0.518,0.553] |
| <b>Treatment setting × population</b> |                              |                        |                        |                        |                           |                        |
| Unknown source × Aged Medicare        | 0.949<br>[0.935,0.964]       | 1.245<br>[1.222,1.268] | 1.307<br>[1.281,1.333] | 1.451<br>[1.401,1.503] | 1.276<br>[1.165,1.397]    | 1.105<br>[1.057,1.154] |
| Unknown source × Disabled Medicare    | 1.060<br>[1.017,1.105]       | 1.482<br>[1.419,1.549] | 1.578<br>[1.501,1.659] | 1.712<br>[1.572,1.863] | 1.759<br>[1.512,2.047]    | 1.430<br>[1.334,1.534] |
| ED × Aged Medicare                    | 0.794<br>[0.780,0.807]       | 0.592<br>[0.570,0.615] | 1.235<br>[1.206,1.265] | 1.488<br>[1.425,1.553] | 1.716<br>[1.333,2.208]    | 0.785<br>[0.740,0.831] |
| ED × Disabled Medicare                | 0.567<br>[0.544,0.590]       | 0.388<br>[0.355,0.425] | 1.318<br>[1.249,1.390] | 1.261<br>[1.138,1.396] | 1.397<br>[0.912,2.141]    | 0.686<br>[0.627,0.751] |
| <b>Female</b>                         | 0.937<br>[0.934,0.941]       | 0.933<br>[0.928,0.937] | 0.988<br>[0.984,0.993] | 1.122<br>[1.113,1.130] | 0.720<br>[0.702,0.739]    | 0.923<br>[0.911,0.936] |
| <b>Race/ethnicity</b>                 |                              |                        |                        |                        |                           |                        |
| White                                 | 1<br>[1,1]                   | 1<br>[1,1]             | 1<br>[1,1]             | 1<br>[1,1]             | 1<br>[1,1]                | 1<br>[1,1]             |
| Black                                 | 1.165                        | 1.264                  | 0.840                  | 0.895                  | 0.725                     | 1.017                  |

| Table A2                          | Prescription characteristics |                        |                        |                        |                        |                        |
|-----------------------------------|------------------------------|------------------------|------------------------|------------------------|------------------------|------------------------|
|                                   | (1)                          | (2)                    | (3)                    | (4)                    | (5)                    | (6)                    |
| Odds ratios reported              | >3 days                      | >7 days                | >50 MME                | >90 MME                | Long-acting            | Long-term use          |
| Hispanic                          | [1.158,1.172]<br>1.230       | [1.254,1.274]<br>1.399 | [0.834,0.846]<br>0.815 | [0.884,0.906]<br>0.894 | [0.692,0.759]<br>0.749 | [0.996,1.038]<br>0.853 |
| Asian                             | [1.222,1.237]<br>1.085       | [1.388,1.411]<br>1.032 | [0.809,0.822]<br>0.844 | [0.882,0.906]<br>0.793 | [0.712,0.787]<br>0.772 | [0.832,0.875]<br>0.456 |
| Unknown race/ethnicity            | [1.074,1.096]<br>1.003       | [1.018,1.047]<br>1.008 | [0.834,0.855]<br>0.952 | [0.775,0.811]<br>0.918 | [0.712,0.837]<br>1.069 | [0.431,0.481]<br>0.872 |
| Year                              | [0.993,1.013]<br>1.019       | [0.995,1.022]<br>1.035 | [0.941,0.964]<br>0.907 | [0.899,0.937]<br>0.767 | [1.003,1.139]<br>0.946 | [0.841,0.904]<br>0.952 |
| Age                               | [1.018,1.020]<br>0.943       | [1.033,1.036]<br>0.901 | [0.906,0.908]<br>0.908 | [0.766,0.769]<br>0.882 | [0.940,0.952]<br>1.075 | [0.949,0.955]<br>1.317 |
| Age <sup>2</sup>                  | [0.942,0.944]<br>1.001       | [0.900,0.902]<br>1.003 | [0.906,0.909]<br>1.002 | [0.880,0.883]<br>1.002 | [1.064,1.087]<br>0.999 | [1.305,1.330]<br>0.995 |
| Age <sup>3</sup>                  | [1.001,1.001]<br>1.000       | [1.002,1.003]<br>1.000 | [1.002,1.002]<br>1.000 | [1.002,1.003]<br>1.000 | [0.999,0.999]<br>1.000 | [0.995,0.996]<br>1.000 |
| Elixhauser comorbidities (binary) | [1.000,1.000]                | [1.000,1.000]          | [1.000,1.000]          | [1.000,1.000]          | [1.000,1.000]          | [1.000,1.000]          |
| CHF                               | 1.036<br>[1.014,1.058]       | 1.051<br>[1.030,1.072] | 0.948<br>[0.926,0.969] | 1.049<br>[1.012,1.087] | 0.844<br>[0.782,0.911] | 1.165<br>[1.119,1.214] |
| Arrhythmia                        | 1.097<br>[1.081,1.112]       | 1.011<br>[0.997,1.026] | 1.192<br>[1.174,1.210] | 1.129<br>[1.102,1.158] | 1.432<br>[1.357,1.510] | 0.930<br>[0.901,0.960] |
| Valvular disease                  | 1.174<br>[1.148,1.201]       | 0.994<br>[0.973,1.016] | 1.137<br>[1.111,1.163] | 1.042<br>[1.004,1.081] | 0.906<br>[0.834,0.984] | 0.780<br>[0.742,0.820] |
| Pulm. circ. dis.                  | 1.174<br>[1.132,1.217]       | 1.158<br>[1.119,1.199] | 0.953<br>[0.918,0.989] | 0.929<br>[0.874,0.987] | 1.112<br>[0.992,1.247] | 1.196<br>[1.117,1.281] |
| Peripheral vascular dis.          | 1.209<br>[1.182,1.237]       | 1.041<br>[1.020,1.063] | 1.191<br>[1.164,1.219] | 1.171<br>[1.129,1.214] | 1.171<br>[1.088,1.261] | 1.211<br>[1.163,1.262] |
| Uncomp. HTN                       | 1.217<br>[1.208,1.225]       | 1.222<br>[1.213,1.231] | 1.130<br>[1.121,1.139] | 1.136<br>[1.121,1.151] | 1.547<br>[1.494,1.602] | 1.203<br>[1.182,1.225] |
| Comp. HTN                         | 1.116<br>[1.087,1.145]       | 1.080<br>[1.053,1.107] | 0.979<br>[0.952,1.007] | 0.953<br>[0.910,0.998] | 1.026<br>[0.930,1.132] | 0.961<br>[0.911,1.014] |
| Other neuro.                      | 1.103<br>[1.079,1.126]       | 1.164<br>[1.139,1.190] | 1.023<br>[0.999,1.047] | 1.085<br>[1.046,1.126] | 1.198<br>[1.107,1.296] | 1.239<br>[1.185,1.296] |
| Chronic pulm. dis.                | 1.173<br>[1.160,1.187]       | 1.185<br>[1.171,1.200] | 1.109<br>[1.096,1.124] | 1.128<br>[1.106,1.151] | 1.569<br>[1.495,1.648] | 1.379<br>[1.342,1.417] |

| Odds ratios reported   | Prescription characteristics |                        |                        |                        |                        |                        |
|------------------------|------------------------------|------------------------|------------------------|------------------------|------------------------|------------------------|
|                        | (1)<br>>3 days               | (2)<br>>7 days         | (3)<br>>50 MME         | (4)<br>>90 MME         | (5)<br>Long-acting     | (6)<br>Long-term use   |
| Peptic ulcer           | 1.466<br>[1.368,1.571]       | 1.359<br>[1.275,1.448] | 0.910<br>[0.848,0.976] | 1.005<br>[0.899,1.123] | 1.072<br>[0.861,1.333] | 1.614<br>[1.435,1.814] |
| Uncomp. Diabetes       | 1.041<br>[1.031,1.051]       | 1.103<br>[1.091,1.114] | 0.937<br>[0.927,0.948] | 0.964<br>[0.946,0.982] | 0.946<br>[0.903,0.992] | 1.232<br>[1.205,1.260] |
| Comp. Diabetes         | 1.037<br>[1.014,1.061]       | 1.033<br>[1.011,1.056] | 0.927<br>[0.904,0.950] | 0.933<br>[0.895,0.973] | 0.978<br>[0.893,1.072] | 1.125<br>[1.076,1.175] |
| Paralysis              | 1.378<br>[1.309,1.450]       | 1.613<br>[1.542,1.687] | 1.085<br>[1.034,1.139] | 1.157<br>[1.076,1.244] | 1.846<br>[1.628,2.093] | 2.237<br>[2.066,2.422] |
| Renal failure          | 0.978<br>[0.956,1.001]       | 1.002<br>[0.980,1.024] | 0.930<br>[0.906,0.954] | 0.933<br>[0.895,0.973] | 0.867<br>[0.795,0.946] | 1.020<br>[0.975,1.067] |
| Solid tumor w/o mets   | 0.999<br>[0.976,1.022]       | 0.715<br>[0.697,0.733] | 1.466<br>[1.432,1.500] | 1.239<br>[1.192,1.288] | 1.366<br>[1.250,1.493] | 0.814<br>[0.768,0.864] |
| Liver dis.             | 1.214<br>[1.182,1.247]       | 1.101<br>[1.070,1.132] | 1.105<br>[1.075,1.136] | 1.082<br>[1.033,1.134] | 1.215<br>[1.102,1.340] | 1.300<br>[1.225,1.381] |
| Met. Cancer            | 1.588<br>[1.476,1.708]       | 1.329<br>[1.243,1.422] | 1.495<br>[1.404,1.593] | 1.292<br>[1.168,1.428] | 2.314<br>[1.947,2.751] | 1.852<br>[1.603,2.139] |
| HIV/AIDS               | 1.115<br>[1.053,1.180]       | 1.104<br>[1.033,1.181] | 0.991<br>[0.927,1.059] | 0.979<br>[0.871,1.100] | 1.275<br>[0.979,1.660] | 1.076<br>[0.921,1.257] |
| Rheumatoid Arthritis   | 1.497<br>[1.462,1.532]       | 2.017<br>[1.973,2.061] | 0.961<br>[0.937,0.985] | 0.992<br>[0.951,1.034] | 2.207<br>[2.038,2.390] | 2.304<br>[2.209,2.402] |
| Hypothyroid            | 1.112<br>[1.098,1.127]       | 1.097<br>[1.081,1.112] | 1.177<br>[1.161,1.194] | 1.121<br>[1.095,1.147] | 1.620<br>[1.535,1.710] | 1.025<br>[0.992,1.060] |
| Lymphoma               | 1.122<br>[1.067,1.180]       | 1.150<br>[1.094,1.209] | 1.077<br>[1.022,1.136] | 1.070<br>[0.981,1.168] | 2.044<br>[1.759,2.374] | 1.626<br>[1.471,1.798] |
| Coagulopathy           | 1.191<br>[1.157,1.227]       | 1.065<br>[1.035,1.097] | 1.351<br>[1.313,1.390] | 1.134<br>[1.082,1.188] | 1.410<br>[1.282,1.550] | 1.063<br>[0.996,1.135] |
| Obesity                | 1.272<br>[1.252,1.292]       | 1.152<br>[1.132,1.172] | 1.744<br>[1.717,1.771] | 2.115<br>[2.067,2.164] | 1.992<br>[1.877,2.114] | 1.095<br>[1.050,1.141] |
| Weight Loss            | 1.170<br>[1.131,1.210]       | 1.234<br>[1.196,1.274] | 1.152<br>[1.114,1.192] | 1.358<br>[1.291,1.427] | 1.668<br>[1.524,1.827] | 1.655<br>[1.556,1.761] |
| Fluid/Electrolyte Dis. | 1.301<br>[1.278,1.324]       | 1.169<br>[1.149,1.190] | 1.251<br>[1.229,1.274] | 1.176<br>[1.143,1.211] | 1.662<br>[1.566,1.764] | 1.205<br>[1.161,1.251] |
| Blood Loss Anemia      | 1.167<br>[1.113,1.225]       | 1.009<br>[0.961,1.059] | 1.435<br>[1.371,1.503] | 1.275<br>[1.186,1.372] | 1.396<br>[1.197,1.628] | 1.061<br>[0.956,1.178] |

| <b>Table A2</b>                    | Prescription characteristics |                         |                         |                           |                          |                           |
|------------------------------------|------------------------------|-------------------------|-------------------------|---------------------------|--------------------------|---------------------------|
|                                    | (1)                          | (2)                     | (3)                     | (4)                       | (5)                      | (6)                       |
| Odds ratios reported               | >3 days                      | >7 days                 | >50 MME                 | >90 MME                   | Long-acting              | Long-term use             |
| Deficiency Anemia                  | 1.105                        | 1.100                   | 1.036                   | 0.989                     | 1.168                    | 1.166                     |
|                                    | [1.076,1.135]                | [1.071,1.131]           | [1.007,1.066]           | [0.944,1.036]             | [1.057,1.290]            | [1.101,1.235]             |
| Alcohol Abuse                      | 1.245                        | 1.214                   | 1.194                   | 1.147                     | 1.351                    | 1.529                     |
|                                    | [1.201,1.291]                | [1.167,1.263]           | [1.149,1.240]           | [1.075,1.223]             | [1.198,1.523]            | [1.417,1.650]             |
| Drug Abuse                         | 1.081                        | 1.330                   | 1.041                   | 1.065                     | 2.332                    | 2.318                     |
|                                    | [1.030,1.134]                | [1.259,1.406]           | [0.986,1.098]           | [0.973,1.166]             | [2.015,2.700]            | [2.096,2.562]             |
| Psychoses                          | 0.908                        | 0.961                   | 0.884                   | 1.031                     | 1.013                    | 1.272                     |
|                                    | [0.874,0.943]                | [0.925,0.998]           | [0.846,0.923]           | [0.964,1.102]             | [0.900,1.139]            | [1.188,1.361]             |
| Depression                         | 1.044                        | 1.191                   | 1.042                   | 1.088                     | 2.098                    | 1.853                     |
|                                    | [1.030,1.058]                | [1.173,1.209]           | [1.026,1.058]           | [1.061,1.116]             | [1.991,2.210]            | [1.796,1.911]             |
| <b>Any claim 6 mos before fill</b> | 1.078                        | 1.185                   | 1.317                   | 1.447                     | 2.085                    | 1.110                     |
|                                    | [1.070,1.086]                | [1.168,1.202]           | [1.303,1.331]           | [1.417,1.477]             | [1.909,2.276]            | [1.066,1.156]             |
| <b>Constant</b>                    | 1.16e-16                     | 9.59e-31                | 6.99e+84                | 1.12e+231                 | 8.69e+44                 | 1.53e+39                  |
|                                    | [1.86e-17,<br>7.27e-16]      | [8.28e-32,<br>1.11e-29] | [7.41e+83,<br>6.59e+85] | [1.80e+229,<br>6.93e+232] | [2.02e+39,<br>3.761e+50] | [1.682e+36,<br>1.386e+42] |
| Observations                       | 5,243,498                    | 5,243,498               | 5,243,498               | 5,243,498                 | 5,243,498                | 3,658,393                 |

Exponentiated coefficients; 95% confidence intervals in brackets

Appendix 9: Complete results for analysis of guideline concordance predicting long-term use  
 Table A3: logistic regression results

| Odds ratios reported                                                           | (1)                    |
|--------------------------------------------------------------------------------|------------------------|
|                                                                                | Long-term use          |
| <b>Prescription guideline concordance</b>                                      |                        |
| Fully concordant (<=3 days supply, <=50 MME per day, short-acting formulation) | 0.259<br>[0.250,0.269] |
| <b>Treatment setting</b>                                                       |                        |
| Non-ED                                                                         | 1<br>[1,1]             |
| Unknown source                                                                 | 0.764<br>[0.743,0.786] |
| ED                                                                             | 0.489<br>[0.469,0.511] |
| <b>Guideline concordance × treatment setting</b>                               |                        |
| Fully concordant × Non-ED                                                      | 1<br>[1,1]             |
| Fully concordant × Unknown source                                              | 0.851<br>[0.794,0.913] |



|                                                    |               |
|----------------------------------------------------|---------------|
| Fully concordant x ED                              | 3.099         |
|                                                    | [2.883,3.331] |
| <b>Enrollee population</b>                         |               |
| Commercial                                         | 1             |
|                                                    | [1,1]         |
| Aged Medicare                                      | 1.733         |
|                                                    | [1.683,1.785] |
| Disabled Medicare                                  | 4.472         |
|                                                    | [4.336,4.613] |
| <b>Guideline concordance x Enrollee population</b> |               |
| Fully concordant x Commercial                      | 1             |
|                                                    | [1,1]         |
| Fully concordant x Aged Medicare                   | 0.801         |
|                                                    | [0.748,0.857] |
| Fully concordant x Disabled Medicare               | 0.743         |
|                                                    | [0.653,0.844] |
| <b>Treatment setting x Enrollee population</b>     |               |
| Non-ED x Commercial                                | 1             |
|                                                    | [1,1]         |

|                                    |               |
|------------------------------------|---------------|
| Non-ED x Aged Medicare             | 1             |
|                                    | [1,1]         |
| Non-ED x Disabled Medicare         | 1             |
|                                    | [1,1]         |
| Unknown source x Commercial        | 1             |
|                                    | [1,1]         |
| Unknown source x Aged Medicare     | 1.053         |
|                                    | [1.005,1.103] |
| Unknown source x Disabled Medicare | 1.308         |
|                                    | [1.214,1.409] |
| ED x Commercial                    | 1             |
|                                    | [1,1]         |
| ED x Aged Medicare                 | 0.818         |
|                                    | [0.758,0.883] |
| ED x Disabled Medicare             | 0.666         |
|                                    | [0.587,0.755] |

**Guideline concordance x Treatment setting x Enrollee population**

|                                        |       |
|----------------------------------------|-------|
| Fully concordant x Non-ED x Commercial | 1     |
|                                        | [1,1] |

|                                                       |               |
|-------------------------------------------------------|---------------|
|                                                       | 1             |
| Fully concordant × Non-ED × Aged Medicare             | [1,1]         |
| Fully concordant × Non-ED × Disabled Medicare         | 1             |
|                                                       | [1,1]         |
| Fully concordant × Unknown source × Commercial        | 1             |
|                                                       | [1,1]         |
| Fully concordant × Unknown source × Aged Medicare     | 0.975         |
|                                                       | [0.840,1.131] |
| Fully concordant × Unknown source × Disabled Medicare | 1.165         |
|                                                       | [0.909,1.493] |
| Fully concordant × ED × Commercial                    | 1             |
|                                                       | [1,1]         |
| Fully concordant × ED × Aged Medicare                 | 1.183         |
|                                                       | [1.038,1.349] |
| Fully concordant × ED × Disabled Medicare             | 1.518         |
|                                                       | [1.225,1.881] |
| <b>Year</b>                                           | 0.957         |
|                                                       | [0.953,0.960] |
| <b>Age</b>                                            | 1.316         |
|                                                       | [1.304,1.328] |

|                                 |               |
|---------------------------------|---------------|
| <b>Age<sup>2</sup></b>          | 0.995         |
|                                 | [0.995,0.996] |
| <b>Age<sup>3</sup></b>          | 1.000         |
|                                 | [1.000,1.000] |
| <b>Elixhauser comorbidities</b> |               |
| CHF                             | 1.169         |
|                                 | [1.122,1.217] |
| Arrhythmia                      | 0.919         |
|                                 | [0.891,0.949] |
| Valvular disease                | 0.758         |
|                                 | [0.721,0.797] |
| Pulm. circ. dis.                | 1.182         |
|                                 | [1.104,1.267] |
| Peripheral vascular dis.        | 1.185         |
|                                 | [1.138,1.235] |
| Uncomp. HTN                     | 1.158         |
|                                 | [1.138,1.179] |
| Comp. HTN                       | 0.948         |
|                                 | [0.899,1.000] |
| Other neuro.                    | 1.239         |
|                                 | [1.184,1.296] |

|                      |                        |
|----------------------|------------------------|
| Chronic pulm. dis.   | 1.346<br>[1.310,1.383] |
| Peptic ulcer         | 1.565<br>[1.392,1.760] |
| Uncomp. Diabetes     | 1.226<br>[1.199,1.254] |
| Comp. Diabetes       | 1.124<br>[1.075,1.175] |
| Paralysis            | 2.230<br>[2.058,2.416] |
| Renal failure        | 1.029<br>[0.984,1.076] |
| Solid tumor w/o mets | 0.802<br>[0.756,0.851] |
| Liver dis.           | 1.256<br>[1.183,1.334] |
| Met. Cancer          | 1.729<br>[1.497,1.999] |
| HIV/AIDS             | 1.093<br>[0.936,1.277] |

|                        |               |
|------------------------|---------------|
| Rheumatoid Arthritis   | 2.193         |
|                        | [2.103,2.287] |
| Hypothyroid            | 1.006         |
|                        | [0.973,1.040] |
| Lymphoma               | 1.617         |
|                        | [1.462,1.788] |
| Coagulopathy           | 1.034         |
|                        | [0.968,1.104] |
| Obesity                | 1.036         |
|                        | [0.993,1.080] |
| Weight Loss            | 1.630         |
|                        | [1.532,1.734] |
| Fluid/Electrolyte Dis. | 1.158         |
|                        | [1.116,1.202] |
| Blood Loss Anemia      | 1.027         |
|                        | [0.925,1.140] |
| Deficiency Anemia      | 1.157         |
|                        | [1.093,1.226] |
| Alcohol Abuse          | 1.504         |
|                        | [1.393,1.623] |

|                                              |               |
|----------------------------------------------|---------------|
| Drug Abuse                                   | 2.304         |
|                                              | [2.083,2.548] |
| Psychoses                                    | 1.323         |
|                                              | [1.236,1.416] |
| Depression                                   | 1.854         |
|                                              | [1.797,1.913] |
| <b>Any claim within 6 months before fill</b> | 1.057         |
|                                              | [1.014,1.101] |
| <b>Female</b>                                | 0.920         |
|                                              | [0.908,0.933] |
| <b>Race/ethnicity</b>                        |               |
| White                                        | 1             |
|                                              | [1,1]         |
| Black                                        | 0.998         |
|                                              | [0.977,1.019] |
| Hispanic                                     | 0.829         |
|                                              | [0.808,0.850] |
| Asian                                        | 0.452         |
|                                              | [0.428,0.478] |
| Unknown race/ethnicity                       | 0.875         |
|                                              | [0.844,0.907] |

*N*

3,658,393

---

Exponentiated coefficients; 95% confidence intervals in brackets



Appendix 10: Risk ratios and confidence intervals for results presented in Figure 2

| Table A5                            |                   | Commercial |          |          | Aged Medicare |          |          | Disabled Medicare |          |          |
|-------------------------------------|-------------------|------------|----------|----------|---------------|----------|----------|-------------------|----------|----------|
| Outcome                             | Treatment setting | Risk Ratio | Lower CI | Upper CI | Risk Ratio    | Lower CI | Upper CI | Risk Ratio        | Lower CI | Upper CI |
| <b>&gt;3 days supply</b>            | Non-ED (ref.)     | 1          | -        | -        | 1             | -        | -        | 1                 | -        | -        |
|                                     | Unknown source    | 0.72       | 0.71     | 0.72     | 0.76          | 0.75     | 0.76     | 0.81              | 0.79     | 0.82     |
|                                     | ED                | 0.56       | 0.56     | 0.56     | 0.56          | 0.55     | 0.56     | 0.48              | 0.47     | 0.49     |
| <b>&gt;50 MME/day</b>               | Non-ED (ref.)     | 1          | -        | -        | 1             | -        | -        | 1                 | -        | -        |
|                                     | Unknown source    | 0.75       | 0.74     | 0.75     | 0.92          | 0.91     | 0.94     | 1.07              | 1.03     | 1.11     |
|                                     | ED                | 0.63       | 0.62     | 0.63     | 0.73          | 0.72     | 0.75     | 0.77              | 0.74     | 0.81     |
| <b>&gt;7 days supply</b>            | Non-ED (ref.)     | 1          | -        | -        | 1             | -        | -        | 1                 | -        | -        |
|                                     | Unknown source    | 0.41       | 0.40     | 0.41     | 0.56          | 0.55     | 0.56     | 0.66              | 0.64     | 0.68     |
|                                     | ED                | 0.16       | 0.16     | 0.16     | 0.12          | 0.12     | 0.13     | 0.09              | 0.08     | 0.10     |
| <b>&gt;90 MME/day</b>               | Non-ED (ref.)     | 1          | -        | -        | 1             | -        | -        | 1                 | -        | -        |
|                                     | Unknown source    | 0.62       | 0.61     | 0.63     | 0.87          | 0.84     | 0.90     | 1.01              | 0.93     | 1.09     |
|                                     | ED                | 0.46       | 0.46     | 0.47     | 0.67          | 0.64     | 0.69     | 0.57              | 0.52     | 0.63     |
| <b>Long-Acting/Extended Release</b> | Non-ED (ref.)     | 1          | -        | -        | 1             | -        | -        | 1                 | -        | -        |
|                                     | Unknown source    | 0.65       | 0.63     | 0.68     | 0.83          | 0.77     | 0.90     | 1.14              | 0.98     | 1.30     |
|                                     | ED                | 0.08       | 0.07     | 0.09     | 0.14          | 0.11     | 0.17     | 0.12              | 0.07     | 0.16     |
| <b>Long-term Opioid Use</b>         | Non-ED (ref.)     | 1          | -        | -        | 1             | -        | -        | 1                 | -        | -        |
|                                     | Unknown source    | 0.62       | 0.60     | 0.64     | 0.70          | 0.67     | 0.72     | 0.90              | 0.85     | 0.95     |
|                                     | ED                | 0.54       | 0.53     | 0.56     | 0.44          | 0.42     | 0.46     | 0.42              | 0.39     | 0.45     |

**Notes:** Risk ratios calculated from marginal effects after logistic regression; 95% confidence intervals (CI) calculated for the ratio using the delta method

Appendix 11a: Supplementary analyses—Time trends in guideline concordance and progression to long-term use

To understand trends over the 7 years of our study period, we repeated the main analyses, but included time as a categorical variable fully interacted with beneficiary population and treatment setting. We calculated marginal effects (predicted probability of exceeding 3 days, 7 days, 50 MME, 90 MME, of prescribing a long-acting formulation, and of progression to long-term opioid use) and graphed them by beneficiary population and time. We also include an “as observed” analysis showing the average across the entire population.

Figure A2-a: Probability of prescription greater than 3 days supply

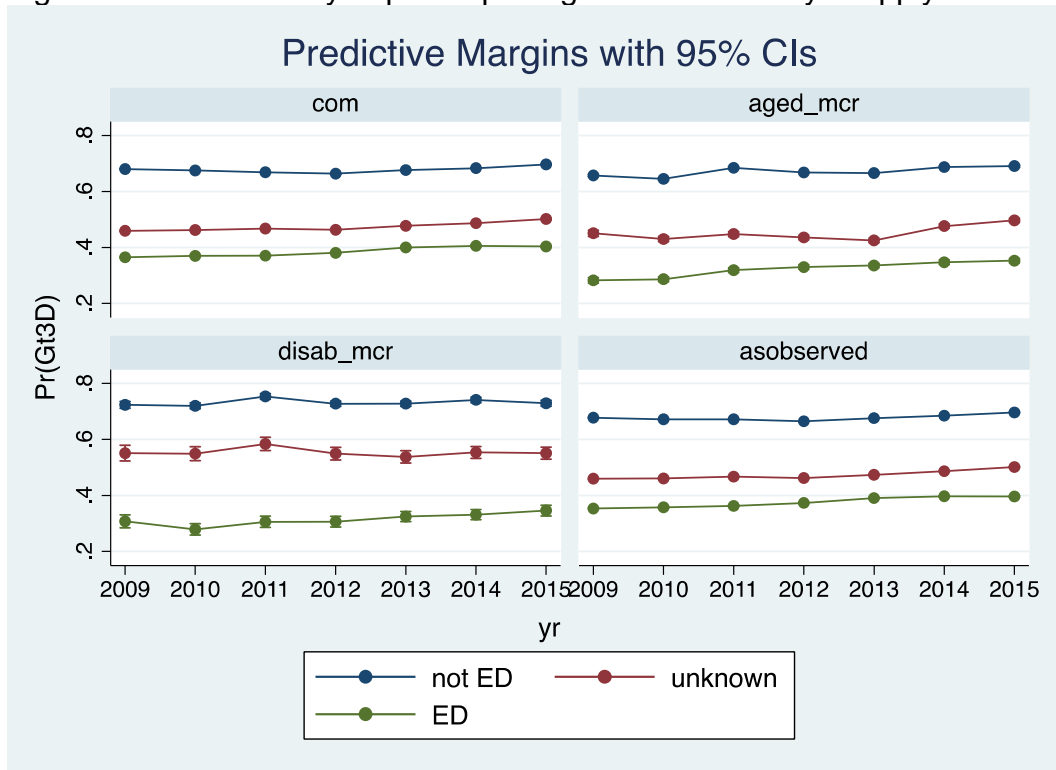

Table A6: Probability of prescription greater than 3 days supply, with 95% confidence intervals (CI)

|             | Commercial  |          |          | Aged Medicare |          |          | Disabled Medicare |          |          |
|-------------|-------------|----------|----------|---------------|----------|----------|-------------------|----------|----------|
|             | Pr(>3 days) | Lower CI | Upper CI | Pr(>3 days)   | Lower CI | Upper CI | Pr(>3d ays)       | Lower CI | Upper CI |
| <b>2009</b> |             |          |          |               |          |          |                   |          |          |
| not ED      | 0.680       | 0.679    | 0.681    | 0.657         | 0.652    | 0.662    | 0.724             | 0.712    | 0.735    |
| ED          | 0.365       | 0.362    | 0.368    | 0.282         | 0.272    | 0.292    | 0.307             | 0.284    | 0.330    |
| unknown     | 0.459       | 0.457    | 0.461    | 0.450         | 0.439    | 0.461    | 0.551             | 0.523    | 0.579    |
| <b>2010</b> |             |          |          |               |          |          |                   |          |          |
| not ED      | 0.675       | 0.674    | 0.676    | 0.645         | 0.641    | 0.649    | 0.720             | 0.709    | 0.730    |
| ED          | 0.370       | 0.366    | 0.373    | 0.286         | 0.278    | 0.295    | 0.278             | 0.258    | 0.298    |
| unknown     | 0.462       | 0.460    | 0.464    | 0.430         | 0.420    | 0.439    | 0.549             | 0.524    | 0.574    |
| <b>2011</b> |             |          |          |               |          |          |                   |          |          |
| not ED      | 0.668       | 0.667    | 0.670    | 0.684         | 0.680    | 0.689    | 0.754             | 0.743    | 0.764    |
| ED          | 0.370       | 0.367    | 0.373    | 0.319         | 0.310    | 0.327    | 0.305             | 0.285    | 0.325    |
| unknown     | 0.467       | 0.465    | 0.469    | 0.448         | 0.439    | 0.456    | 0.584             | 0.560    | 0.608    |
| <b>2012</b> |             |          |          |               |          |          |                   |          |          |
| not ED      | 0.663       | 0.662    | 0.665    | 0.668         | 0.664    | 0.672    | 0.727             | 0.718    | 0.737    |
| ED          | 0.381       | 0.377    | 0.384    | 0.330         | 0.321    | 0.338    | 0.306             | 0.287    | 0.325    |
| unknown     | 0.463       | 0.461    | 0.465    | 0.435         | 0.427    | 0.444    | 0.549             | 0.527    | 0.571    |
| <b>2013</b> |             |          |          |               |          |          |                   |          |          |
| not ED      | 0.676       | 0.675    | 0.678    | 0.666         | 0.662    | 0.669    | 0.728             | 0.718    | 0.737    |
| ED          | 0.400       | 0.396    | 0.403    | 0.335         | 0.327    | 0.343    | 0.324             | 0.306    | 0.342    |
| unknown     | 0.477       | 0.474    | 0.479    | 0.425         | 0.417    | 0.433    | 0.537             | 0.516    | 0.559    |
| <b>2014</b> |             |          |          |               |          |          |                   |          |          |
| not ED      | 0.683       | 0.682    | 0.685    | 0.687         | 0.683    | 0.691    | 0.741             | 0.731    | 0.751    |
| ED          | 0.405       | 0.402    | 0.409    | 0.347         | 0.339    | 0.355    | 0.331             | 0.313    | 0.349    |
| unknown     | 0.487       | 0.484    | 0.489    | 0.476         | 0.468    | 0.484    | 0.554             | 0.532    | 0.575    |
| <b>2015</b> |             |          |          |               |          |          |                   |          |          |
| not ED      | 0.696       | 0.695    | 0.698    | 0.690         | 0.687    | 0.694    | 0.729             | 0.719    | 0.740    |
| ED          | 0.403       | 0.400    | 0.407    | 0.352         | 0.344    | 0.360    | 0.346             | 0.326    | 0.365    |
| unknown     | 0.501       | 0.499    | 0.504    | 0.497         | 0.489    | 0.504    | 0.551             | 0.529    | 0.572    |

### Predictive Margins with 95% CIs

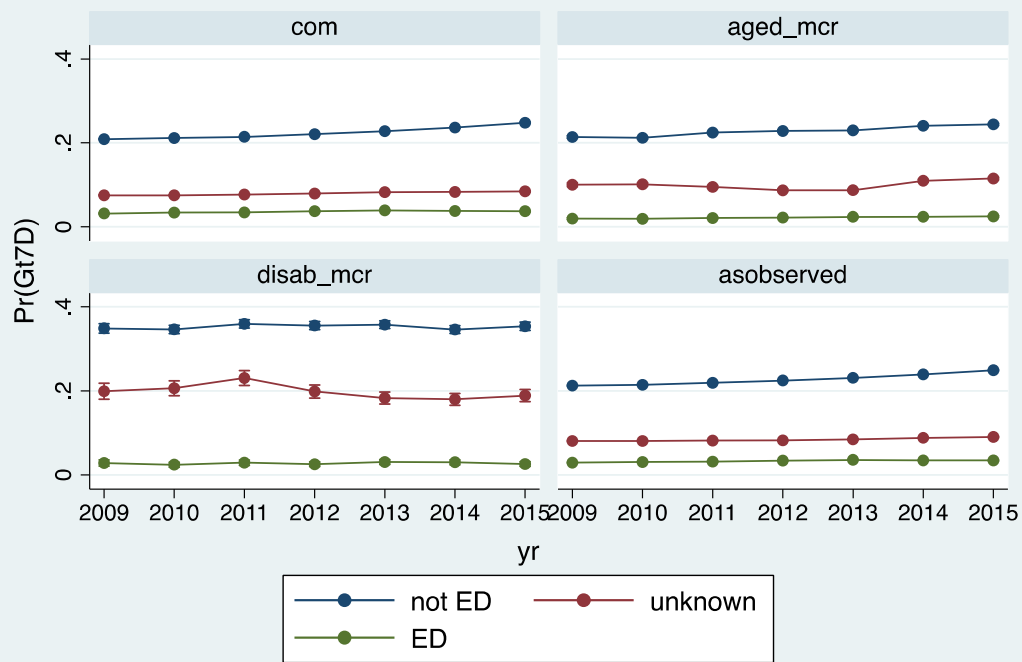

Table A7: Probability of prescription greater than 7 days supply, with 95% confidence intervals (CI)

|             | Pr(>7 days) | Commercial |          | Aged Medicare |          |          | Disabled Medicare |          |          |
|-------------|-------------|------------|----------|---------------|----------|----------|-------------------|----------|----------|
|             |             | Lower CI   | Upper CI | Pr(>7 days)   | Lower CI | Upper CI | Pr(>7d ays)       | Lower CI | Upper CI |
| <b>2009</b> |             |            |          |               |          |          |                   |          |          |
| not ED      | 0.209       | 0.208      | 0.210    | 0.214         | 0.210    | 0.217    | 0.349             | 0.337    | 0.360    |
| ED          | 0.032       | 0.030      | 0.033    | 0.020         | 0.017    | 0.022    | 0.028             | 0.021    | 0.035    |
| unknown     | 0.075       | 0.074      | 0.076    | 0.100         | 0.095    | 0.105    | 0.199             | 0.180    | 0.218    |
| <b>2010</b> |             |            |          |               |          |          |                   |          |          |
| not ED      | 0.212       | 0.210      | 0.213    | 0.212         | 0.209    | 0.215    | 0.346             | 0.336    | 0.356    |
| ED          | 0.034       | 0.032      | 0.035    | 0.019         | 0.017    | 0.021    | 0.024             | 0.018    | 0.030    |
| unknown     | 0.075       | 0.074      | 0.076    | 0.101         | 0.097    | 0.105    | 0.206             | 0.189    | 0.224    |
| <b>2011</b> |             |            |          |               |          |          |                   |          |          |
| not ED      | 0.214       | 0.213      | 0.215    | 0.225         | 0.222    | 0.227    | 0.360             | 0.350    | 0.370    |
| ED          | 0.034       | 0.033      | 0.035    | 0.021         | 0.019    | 0.023    | 0.029             | 0.022    | 0.035    |
| unknown     | 0.077       | 0.075      | 0.078    | 0.095         | 0.091    | 0.099    | 0.231             | 0.213    | 0.248    |
| <b>2012</b> |             |            |          |               |          |          |                   |          |          |
| not ED      | 0.220       | 0.219      | 0.222    | 0.228         | 0.225    | 0.231    | 0.355             | 0.346    | 0.365    |
| ED          | 0.037       | 0.036      | 0.039    | 0.022         | 0.020    | 0.024    | 0.025             | 0.019    | 0.031    |
| unknown     | 0.079       | 0.078      | 0.080    | 0.087         | 0.084    | 0.090    | 0.198             | 0.183    | 0.214    |
| <b>2013</b> |             |            |          |               |          |          |                   |          |          |
| not ED      | 0.228       | 0.226      | 0.229    | 0.230         | 0.227    | 0.233    | 0.358             | 0.349    | 0.367    |
| ED          | 0.039       | 0.037      | 0.040    | 0.024         | 0.022    | 0.025    | 0.030             | 0.025    | 0.036    |
| unknown     | 0.082       | 0.081      | 0.084    | 0.087         | 0.084    | 0.090    | 0.183             | 0.168    | 0.197    |
| <b>2014</b> |             |            |          |               |          |          |                   |          |          |
| not ED      | 0.236       | 0.235      | 0.238    | 0.241         | 0.238    | 0.244    | 0.346             | 0.336    | 0.355    |
| ED          | 0.037       | 0.036      | 0.039    | 0.024         | 0.022    | 0.026    | 0.030             | 0.024    | 0.036    |
| unknown     | 0.083       | 0.081      | 0.084    | 0.109         | 0.106    | 0.113    | 0.180             | 0.166    | 0.194    |
| <b>2015</b> |             |            |          |               |          |          |                   |          |          |
| not ED      | 0.248       | 0.246      | 0.249    | 0.244         | 0.241    | 0.247    | 0.354             | 0.344    | 0.364    |
| ED          | 0.037       | 0.036      | 0.038    | 0.025         | 0.023    | 0.027    | 0.026             | 0.020    | 0.031    |
| unknown     | 0.085       | 0.083      | 0.086    | 0.115         | 0.111    | 0.118    | 0.189             | 0.174    | 0.203    |

Figure A2-c: Probability of prescription greater than 50 MME per day

### Predictive Margins with 95% CIs

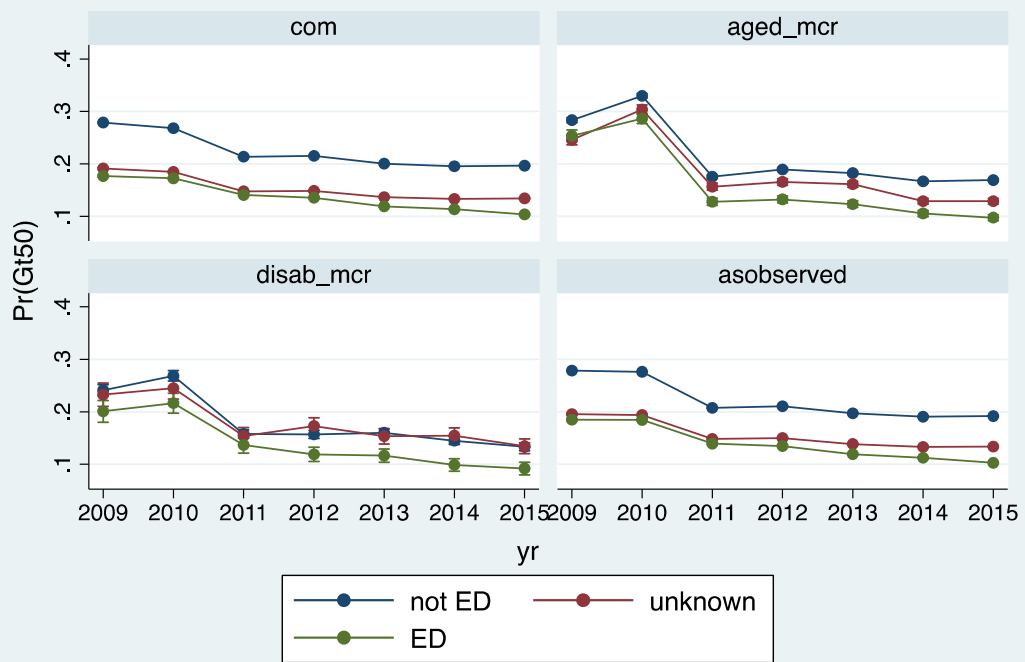

Table A8: Probability of prescription greater than 50 MME per day, with 95% confidence intervals (CI)

|             | Commercial  |          |          | Aged Medicare |          |          | Disabled Medicare |          |          |
|-------------|-------------|----------|----------|---------------|----------|----------|-------------------|----------|----------|
|             | Pr(>50 MME) | Lower CI | Upper CI | Pr(>50 MME)   | Lower CI | Upper CI | Pr(>50 MME)       | Lower CI | Upper CI |
| <b>2009</b> |             |          |          |               |          |          |                   |          |          |
| not ED      | 0.279       | 0.277    | 0.280    | 0.283         | 0.279    | 0.288    | 0.241             | 0.230    | 0.252    |
| ED          | 0.177       | 0.174    | 0.179    | 0.254         | 0.243    | 0.265    | 0.201             | 0.180    | 0.222    |
| unknown     | 0.191       | 0.190    | 0.193    | 0.246         | 0.236    | 0.256    | 0.233             | 0.210    | 0.255    |
| <b>2010</b> |             |          |          |               |          |          |                   |          |          |
| not ED      | 0.268       | 0.266    | 0.269    | 0.329         | 0.325    | 0.334    | 0.269             | 0.259    | 0.279    |
| ED          | 0.172       | 0.170    | 0.175    | 0.286         | 0.277    | 0.296    | 0.216             | 0.197    | 0.235    |
| unknown     | 0.185       | 0.183    | 0.186    | 0.303         | 0.295    | 0.312    | 0.245             | 0.224    | 0.265    |
| <b>2011</b> |             |          |          |               |          |          |                   |          |          |
| not ED      | 0.213       | 0.212    | 0.215    | 0.175         | 0.172    | 0.179    | 0.158             | 0.150    | 0.166    |
| ED          | 0.141       | 0.139    | 0.143    | 0.128         | 0.121    | 0.135    | 0.137             | 0.121    | 0.152    |
| unknown     | 0.148       | 0.146    | 0.149    | 0.156         | 0.150    | 0.163    | 0.154             | 0.138    | 0.170    |
| <b>2012</b> |             |          |          |               |          |          |                   |          |          |
| not ED      | 0.215       | 0.214    | 0.216    | 0.189         | 0.186    | 0.192    | 0.157             | 0.150    | 0.165    |
| ED          | 0.135       | 0.133    | 0.138    | 0.132         | 0.125    | 0.139    | 0.119             | 0.105    | 0.133    |
| unknown     | 0.149       | 0.147    | 0.150    | 0.165         | 0.159    | 0.172    | 0.173             | 0.157    | 0.189    |
| <b>2013</b> |             |          |          |               |          |          |                   |          |          |
| not ED      | 0.200       | 0.199    | 0.202    | 0.182         | 0.179    | 0.186    | 0.160             | 0.153    | 0.167    |
| ED          | 0.119       | 0.117    | 0.121    | 0.123         | 0.117    | 0.129    | 0.116             | 0.104    | 0.129    |
| unknown     | 0.137       | 0.135    | 0.138    | 0.161         | 0.155    | 0.167    | 0.153             | 0.139    | 0.168    |
| <b>2014</b> |             |          |          |               |          |          |                   |          |          |
| not ED      | 0.195       | 0.194    | 0.197    | 0.167         | 0.164    | 0.170    | 0.145             | 0.138    | 0.152    |
| ED          | 0.114       | 0.111    | 0.116    | 0.105         | 0.100    | 0.111    | 0.099             | 0.087    | 0.111    |
| unknown     | 0.133       | 0.131    | 0.135    | 0.129         | 0.124    | 0.134    | 0.155             | 0.140    | 0.169    |
| <b>2015</b> |             |          |          |               |          |          |                   |          |          |
| not ED      | 0.197       | 0.195    | 0.198    | 0.169         | 0.166    | 0.172    | 0.133             | 0.126    | 0.141    |
| ED          | 0.104       | 0.101    | 0.106    | 0.097         | 0.092    | 0.103    | 0.092             | 0.080    | 0.104    |
| unknown     | 0.134       | 0.132    | 0.136    | 0.129         | 0.124    | 0.134    | 0.134             | 0.120    | 0.148    |

Figure A2-d: Probability of prescription greater than 90 MME per day

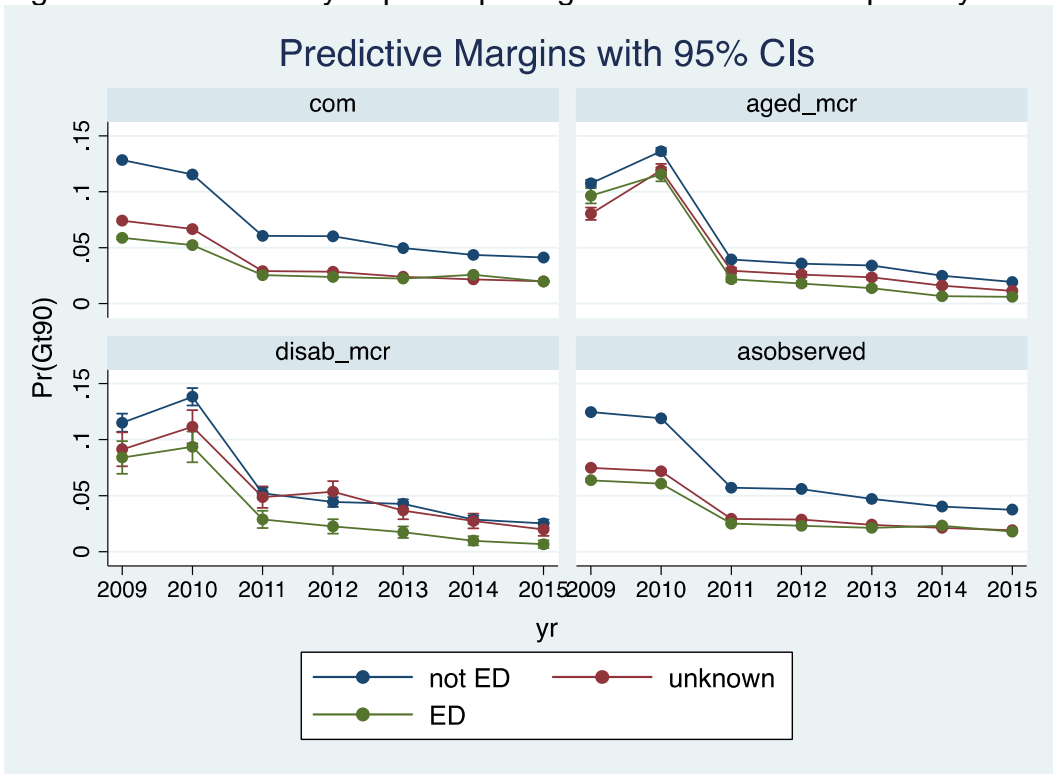



Table A9: Probability of prescription greater than 90 MME per day, with 95% confidence intervals (CI)

|             | Commercial  |          |          | Aged Medicare |          |          | Disabled Medicare |          |          |
|-------------|-------------|----------|----------|---------------|----------|----------|-------------------|----------|----------|
|             | Pr(>90 MME) | Lower CI | Upper CI | Pr(>90 MME)   | Lower CI | Upper CI | Pr(>90 MME)       | Lower CI | Upper CI |
| <b>2009</b> |             |          |          |               |          |          |                   |          |          |
| not ED      | 0.128       | 0.127    | 0.129    | 0.107         | 0.104    | 0.110    | 0.115             | 0.107    | 0.123    |
| ED          | 0.059       | 0.057    | 0.060    | 0.096         | 0.090    | 0.103    | 0.084             | 0.069    | 0.099    |
| unknown     | 0.074       | 0.073    | 0.075    | 0.080         | 0.075    | 0.086    | 0.091             | 0.076    | 0.106    |
| <b>2010</b> |             |          |          |               |          |          |                   |          |          |
| not ED      | 0.115       | 0.114    | 0.116    | 0.136         | 0.133    | 0.139    | 0.138             | 0.131    | 0.146    |
| ED          | 0.052       | 0.051    | 0.054    | 0.116         | 0.109    | 0.122    | 0.094             | 0.080    | 0.107    |
| unknown     | 0.067       | 0.065    | 0.068    | 0.119         | 0.113    | 0.125    | 0.112             | 0.097    | 0.126    |
| <b>2011</b> |             |          |          |               |          |          |                   |          |          |
| not ED      | 0.061       | 0.060    | 0.061    | 0.039         | 0.038    | 0.041    | 0.052             | 0.047    | 0.057    |
| ED          | 0.025       | 0.024    | 0.026    | 0.022         | 0.019    | 0.024    | 0.029             | 0.021    | 0.036    |
| unknown     | 0.029       | 0.028    | 0.030    | 0.029         | 0.027    | 0.032    | 0.049             | 0.039    | 0.058    |
| <b>2012</b> |             |          |          |               |          |          |                   |          |          |
| not ED      | 0.060       | 0.059    | 0.061    | 0.036         | 0.034    | 0.037    | 0.044             | 0.040    | 0.049    |
| ED          | 0.024       | 0.023    | 0.025    | 0.018         | 0.016    | 0.020    | 0.023             | 0.016    | 0.029    |
| unknown     | 0.028       | 0.028    | 0.029    | 0.026         | 0.024    | 0.028    | 0.054             | 0.044    | 0.063    |
| <b>2013</b> |             |          |          |               |          |          |                   |          |          |
| not ED      | 0.050       | 0.049    | 0.050    | 0.034         | 0.033    | 0.035    | 0.043             | 0.039    | 0.047    |
| ED          | 0.022       | 0.021    | 0.023    | 0.014         | 0.012    | 0.016    | 0.017             | 0.012    | 0.023    |
| unknown     | 0.024       | 0.023    | 0.025    | 0.023         | 0.021    | 0.026    | 0.037             | 0.029    | 0.044    |
| <b>2014</b> |             |          |          |               |          |          |                   |          |          |
| not ED      | 0.043       | 0.043    | 0.044    | 0.025         | 0.024    | 0.026    | 0.029             | 0.025    | 0.032    |
| ED          | 0.026       | 0.025    | 0.027    | 0.007         | 0.005    | 0.008    | 0.010             | 0.006    | 0.014    |
| unknown     | 0.022       | 0.021    | 0.022    | 0.016         | 0.014    | 0.018    | 0.027             | 0.021    | 0.034    |
| <b>2015</b> |             |          |          |               |          |          |                   |          |          |
| not ED      | 0.041       | 0.041    | 0.042    | 0.019         | 0.018    | 0.020    | 0.025             | 0.022    | 0.029    |
| ED          | 0.020       | 0.019    | 0.021    | 0.006         | 0.005    | 0.007    | 0.007             | 0.003    | 0.010    |
| unknown     | 0.020       | 0.019    | 0.021    | 0.011         | 0.010    | 0.013    | 0.020             | 0.014    | 0.026    |

Figure A2-e: Probability of prescription for long-acting/extended release formulation

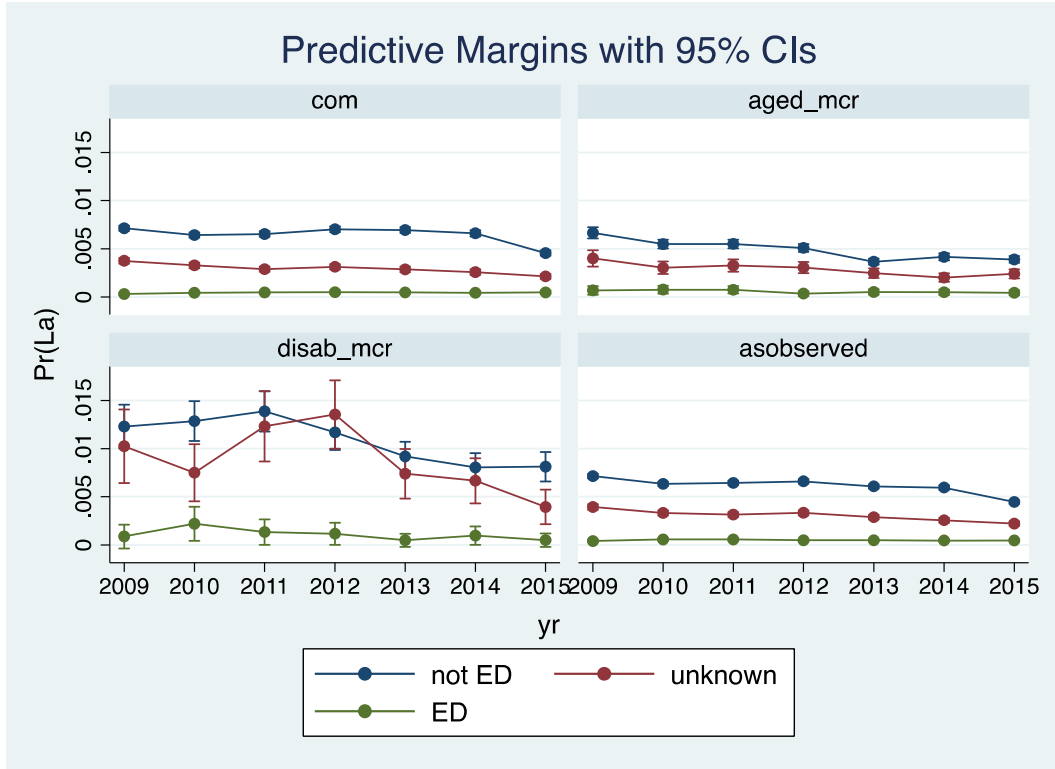

Table A10: Probability of prescription for a long-acting or extended release formulation, with 95% confidence intervals (CI)

|             | Commercial    |             |             | Aged Medicare |             |             | Disabled Medicare |             |             |
|-------------|---------------|-------------|-------------|---------------|-------------|-------------|-------------------|-------------|-------------|
|             | Pr(LA/<br>ER) | Lower<br>CI | Upper<br>CI | Pr(LA/<br>ER) | Lower<br>CI | Upper<br>CI | Pr(LA/<br>ER)     | Lower<br>CI | Upper<br>CI |
| <b>2009</b> |               |             |             |               |             |             |                   |             |             |
| not ED      | 0.007         | 0.007       | 0.007       | 0.007         | 0.006       | 0.007       | 0.012             | 0.010       | 0.015       |
| ED          | 0.000         | 0.000       | 0.000       | 0.001         | 0.000       | 0.001       | 0.001             | 0.000       | 0.002       |
| unknown     | 0.004         | 0.003       | 0.004       | 0.004         | 0.003       | 0.005       | 0.010             | 0.006       | 0.014       |
| <b>2010</b> |               |             |             |               |             |             |                   |             |             |
| not ED      | 0.006         | 0.006       | 0.007       | 0.005         | 0.005       | 0.006       | 0.013             | 0.011       | 0.015       |
| ED          | 0.000         | 0.000       | 0.001       | 0.001         | 0.000       | 0.001       | 0.002             | 0.000       | 0.004       |
| unknown     | 0.003         | 0.003       | 0.004       | 0.003         | 0.002       | 0.004       | 0.007             | 0.005       | 0.010       |
| <b>2011</b> |               |             |             |               |             |             |                   |             |             |
| not ED      | 0.007         | 0.006       | 0.007       | 0.005         | 0.005       | 0.006       | 0.014             | 0.012       | 0.016       |
| ED          | 0.000         | 0.000       | 0.001       | 0.001         | 0.000       | 0.001       | 0.001             | 0.000       | 0.003       |
| unknown     | 0.003         | 0.003       | 0.003       | 0.003         | 0.003       | 0.004       | 0.012             | 0.009       | 0.016       |
| <b>2012</b> |               |             |             |               |             |             |                   |             |             |
| not ED      | 0.007         | 0.007       | 0.007       | 0.005         | 0.005       | 0.005       | 0.012             | 0.010       | 0.014       |
| ED          | 0.001         | 0.000       | 0.001       | 0.000         | 0.000       | 0.001       | 0.001             | 0.000       | 0.002       |
| unknown     | 0.003         | 0.003       | 0.003       | 0.003         | 0.002       | 0.004       | 0.014             | 0.010       | 0.017       |
| <b>2013</b> |               |             |             |               |             |             |                   |             |             |
| not ED      | 0.007         | 0.007       | 0.007       | 0.004         | 0.003       | 0.004       | 0.009             | 0.008       | 0.011       |
| ED          | 0.000         | 0.000       | 0.001       | 0.001         | 0.000       | 0.001       | 0.000             | 0.000       | 0.001       |
| unknown     | 0.003         | 0.003       | 0.003       | 0.002         | 0.002       | 0.003       | 0.007             | 0.005       | 0.010       |
| <b>2014</b> |               |             |             |               |             |             |                   |             |             |
| not ED      | 0.007         | 0.006       | 0.007       | 0.004         | 0.004       | 0.005       | 0.008             | 0.007       | 0.010       |
| ED          | 0.000         | 0.000       | 0.001       | 0.000         | 0.000       | 0.001       | 0.001             | 0.000       | 0.002       |
| unknown     | 0.003         | 0.002       | 0.003       | 0.002         | 0.002       | 0.002       | 0.007             | 0.004       | 0.009       |
| <b>2015</b> |               |             |             |               |             |             |                   |             |             |
| not ED      | 0.005         | 0.004       | 0.005       | 0.004         | 0.004       | 0.004       | 0.008             | 0.007       | 0.010       |
| ED          | 0.000         | 0.000       | 0.001       | 0.000         | 0.000       | 0.001       | 0.001             | 0.000       | 0.001       |
| unknown     | 0.002         | 0.002       | 0.002       | 0.002         | 0.002       | 0.003       | 0.004             | 0.002       | 0.006       |

Figure A2-f: Probability of progression to long-term use

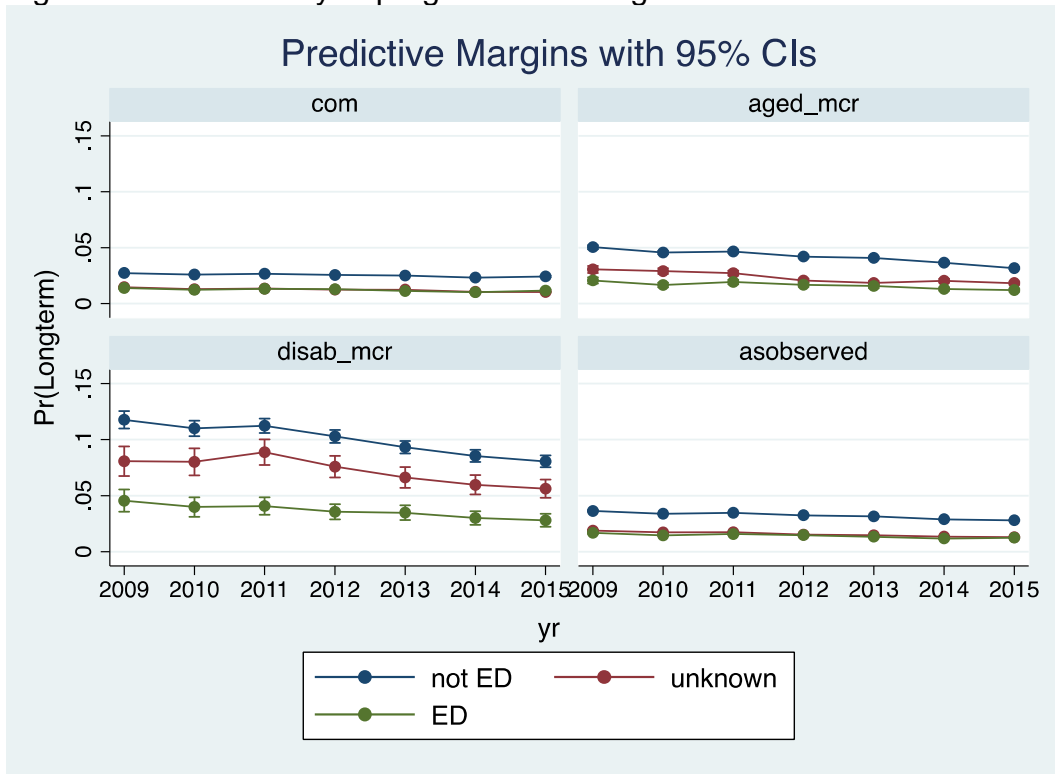

Table A11: Probability of progression to long-term opioid use, with 95% confidence intervals (CI)

|             | Commercial    |          |          | Aged Medicare |          |          | Disabled Medicare |          |          |
|-------------|---------------|----------|----------|---------------|----------|----------|-------------------|----------|----------|
|             | Pr(long term) | Lower CI | Upper CI | Pr(long term) | Lower CI | Upper CI | Pr(long term)     | Lower CI | Upper CI |
| <b>2009</b> |               |          |          |               |          |          |                   |          |          |
| not ED      | 0.027         | 0.027    | 0.028    | 0.050         | 0.048    | 0.052    | 0.118             | 0.110    | 0.126    |
| ED          | 0.014         | 0.013    | 0.015    | 0.021         | 0.018    | 0.023    | 0.045             | 0.036    | 0.055    |
| unknown     | 0.015         | 0.014    | 0.015    | 0.031         | 0.027    | 0.034    | 0.081             | 0.067    | 0.094    |
| <b>2010</b> |               |          |          |               |          |          |                   |          |          |
| not ED      | 0.026         | 0.025    | 0.026    | 0.046         | 0.044    | 0.047    | 0.110             | 0.103    | 0.117    |
| ED          | 0.012         | 0.011    | 0.013    | 0.017         | 0.014    | 0.019    | 0.040             | 0.031    | 0.048    |
| unknown     | 0.013         | 0.012    | 0.014    | 0.029         | 0.026    | 0.032    | 0.080             | 0.068    | 0.092    |
| <b>2011</b> |               |          |          |               |          |          |                   |          |          |
| not ED      | 0.027         | 0.026    | 0.027    | 0.047         | 0.045    | 0.048    | 0.112             | 0.106    | 0.119    |
| ED          | 0.013         | 0.012    | 0.014    | 0.019         | 0.017    | 0.021    | 0.041             | 0.033    | 0.048    |
| unknown     | 0.013         | 0.013    | 0.014    | 0.027         | 0.025    | 0.029    | 0.089             | 0.077    | 0.100    |
| <b>2012</b> |               |          |          |               |          |          |                   |          |          |
| not ED      | 0.026         | 0.025    | 0.026    | 0.042         | 0.041    | 0.043    | 0.103             | 0.097    | 0.109    |
| ED          | 0.013         | 0.012    | 0.014    | 0.017         | 0.015    | 0.019    | 0.036             | 0.029    | 0.042    |
| unknown     | 0.012         | 0.012    | 0.013    | 0.021         | 0.019    | 0.022    | 0.076             | 0.066    | 0.086    |
| <b>2013</b> |               |          |          |               |          |          |                   |          |          |
| not ED      | 0.025         | 0.024    | 0.026    | 0.041         | 0.039    | 0.042    | 0.093             | 0.088    | 0.099    |
| ED          | 0.011         | 0.010    | 0.012    | 0.016         | 0.014    | 0.018    | 0.035             | 0.028    | 0.041    |
| unknown     | 0.012         | 0.012    | 0.013    | 0.018         | 0.017    | 0.020    | 0.066             | 0.057    | 0.075    |
| <b>2014</b> |               |          |          |               |          |          |                   |          |          |
| not ED      | 0.023         | 0.023    | 0.024    | 0.037         | 0.035    | 0.038    | 0.085             | 0.080    | 0.091    |
| ED          | 0.010         | 0.009    | 0.011    | 0.013         | 0.011    | 0.015    | 0.030             | 0.024    | 0.036    |
| unknown     | 0.011         | 0.010    | 0.011    | 0.020         | 0.019    | 0.022    | 0.060             | 0.051    | 0.068    |
| <b>2015</b> |               |          |          |               |          |          |                   |          |          |
| not ED      | 0.024         | 0.023    | 0.025    | 0.032         | 0.031    | 0.033    | 0.081             | 0.075    | 0.086    |
| ED          | 0.012         | 0.011    | 0.013    | 0.012         | 0.011    | 0.013    | 0.028             | 0.022    | 0.034    |
| unknown     | 0.010         | 0.010    | 0.011    | 0.018         | 0.017    | 0.020    | 0.056             | 0.048    | 0.064    |

## Appendix 10b: Supplementary analyses—Comparison of results when limiting analysis to beneficiaries with at least 1 year of follow-up

Analyses of prescription guideline concordance by treatment setting included all qualifying prescriptions, regardless of the amount of follow-up time available for the beneficiary. Analysis of the risk of progression to long-term use was limited to those with at least one year of follow-up, as required by the definition of long-term use (120+days or 10+ fills over 12 months). To determine whether the results of the guideline concordance analyses were affected by the difference in the population included, we repeated all guideline concordance analyses, limiting them to people with at least one year of follow-up.

We present the results as forest plots—one for each beneficiary population (Commercial, aged Medicare, disabled Medicare). The risk ratios comparing the non-ED setting to the ED setting and the unknown setting are presented for each of the guideline concordance outcomes. The 1-year follow-up population is presented in red, while the population not limited by follow-up time is presented in blue. There were no statistically significant differences across the two populations.

Figure A3: Comparison of main results using population with 1 year of follow-up to those with any length of follow-up; commercial beneficiaries

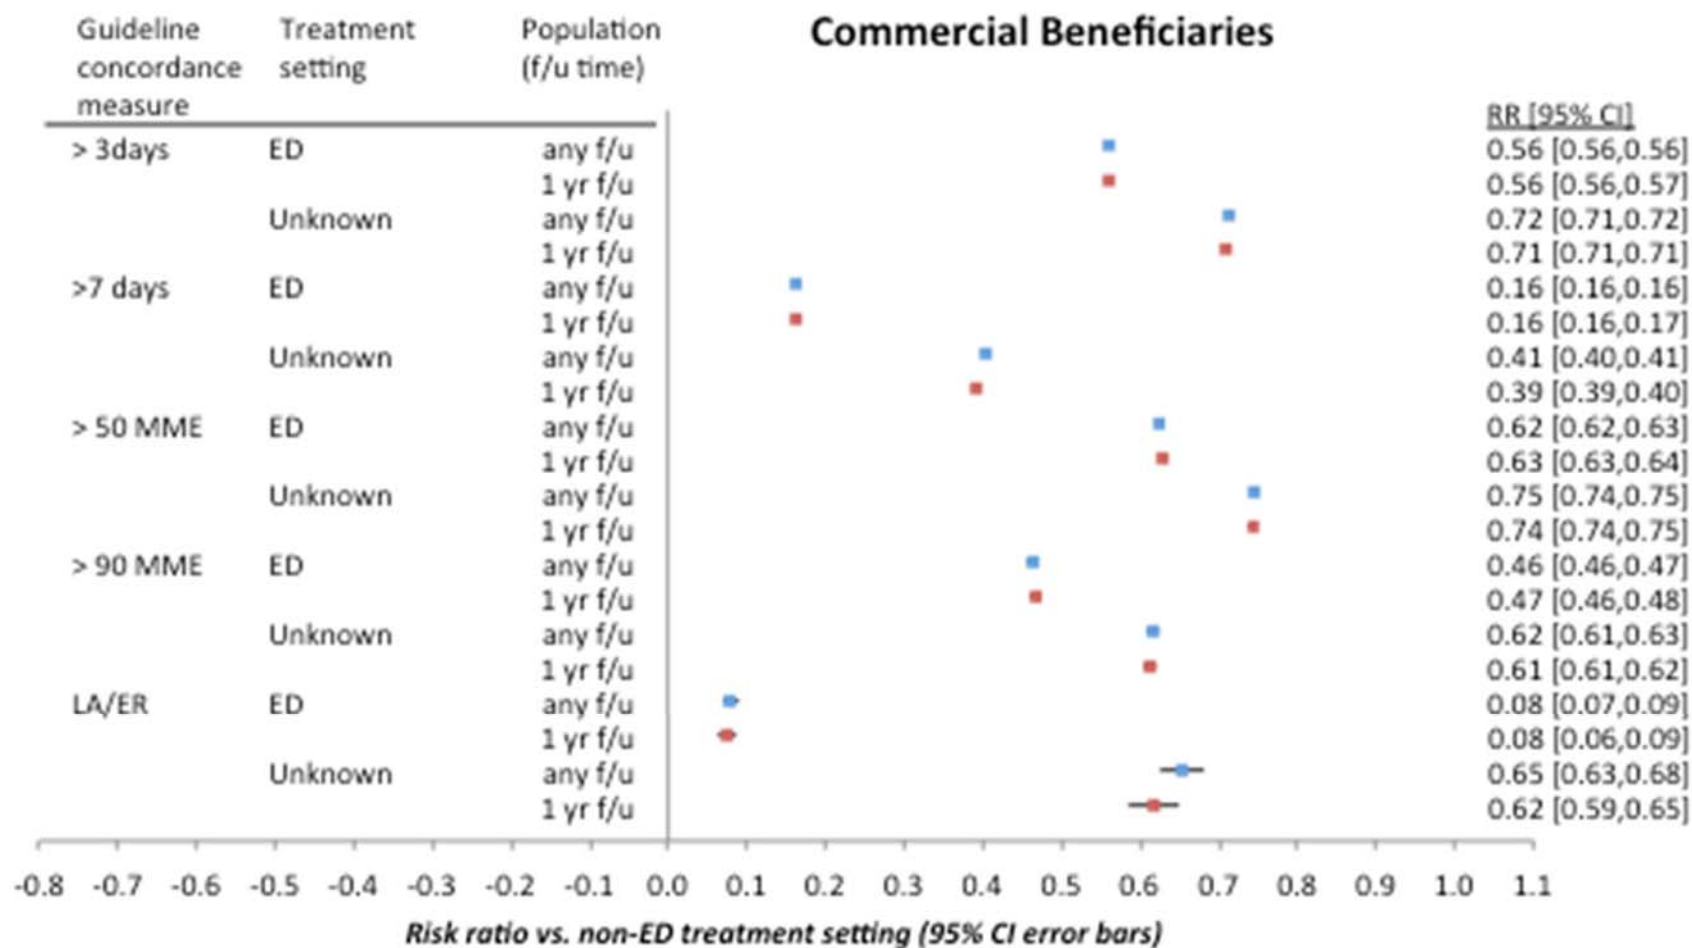

Figure A4: Comparison of main results using population with 1 year of follow-up to those with any length of follow-up; aged Medicare beneficiaries

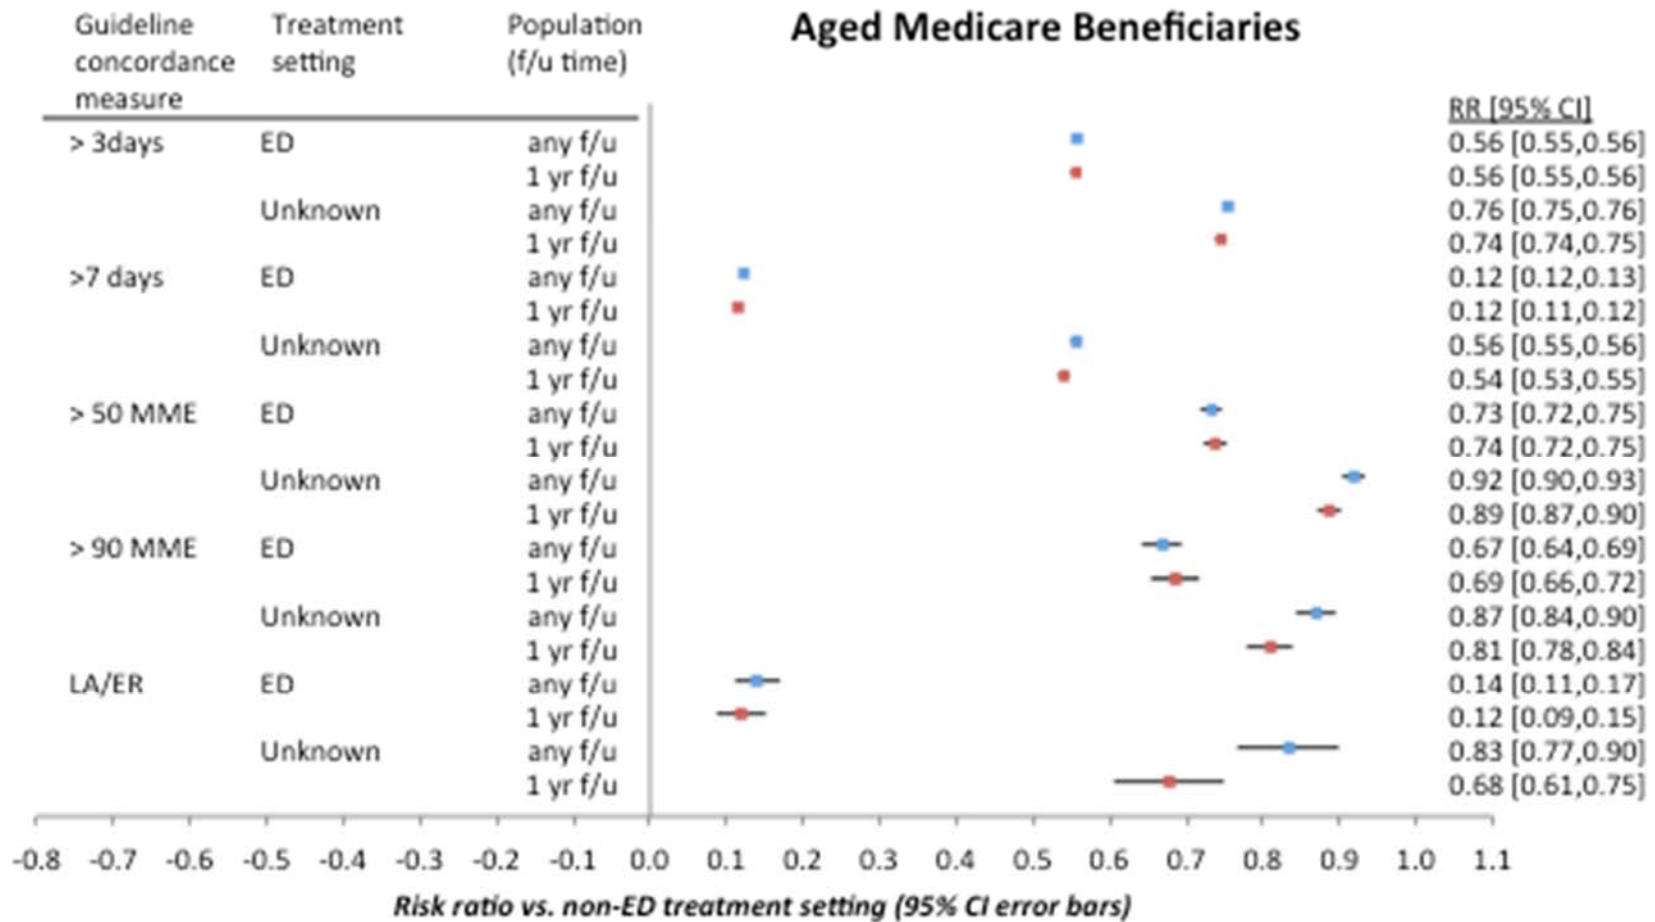



Figure A5: Comparison of main results using population with 1 year of follow-up to those with any length of follow-up; disabled Medicare beneficiaries

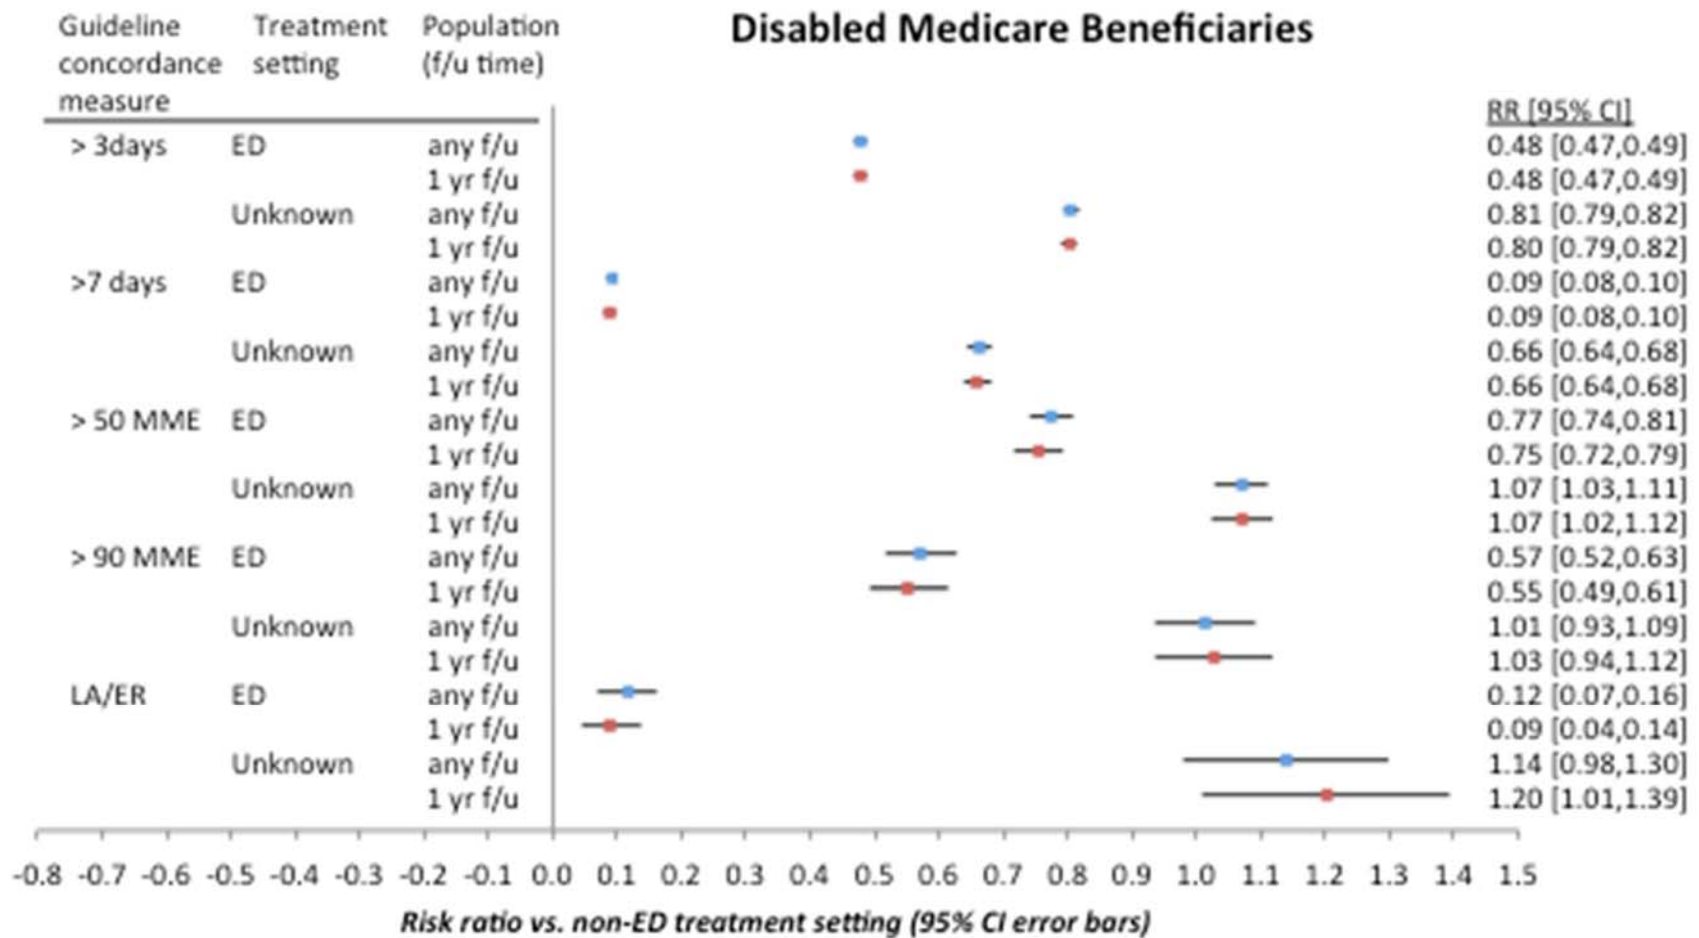

## REFERENCES

1. Quan H, Sundararajan V, Halfon P, et al. Coding algorithms for defining comorbidities in ICD-9-CM and ICD-10 administrative data. *Medical care* 2005;43:1130-9.
2. Prescription Drug Physical Examination Requirements. Centers for Disease Control and Prevention, 2015. 2017, at <https://www.cdc.gov/phlp/docs/pdpe-requirements.pdf>.)
3. 2015 Quality Rating System (QRS) HEDIS Value Set Directory. NCQA, 2015. (Accessed 5/15/2017, at <http://store.ncqa.org/index.php/2015-qrs-hedis-value-set-directory.html>.)
4. Liu Y, Logan JE, Paulozzi LJ, Zhang K, Jones CM. Potential misuse and inappropriate prescription practices involving opioid analgesics. *The American journal of managed care* 2013;19:648-65.
5. Levy B, Paulozzi L, Mack KA, Jones CM. Trends in Opioid Analgesic-Prescribing Rates by Specialty, U.S., 2007-2012. *American journal of preventive medicine* 2015;49:409-13.
