# Supplementary material
Source: PubMed Central journal article supplement (PMC6295192)
Supplement: NIHMS996846-supplement-Trends_Appendix_R3.pdf [file NIHMS996846-supplement-Trends_Appendix_R3.pdf]

**Appendix 1:** Comparison of OptumLabs Data Warehouse population to US insured population

**Table A1: Under 65 privately insured population, 2015**

|                        | US privately insured | OLDW commercial |
|------------------------|----------------------|-----------------|
| <b>Race/ethnicity</b>  |                      |                 |
| White                  | 66%                  | 70%             |
| Asian                  | 7%                   | 6%              |
| Hispanic               | 15%                  | 14%             |
| Black                  | 11%                  | 11%             |
| American Indian        | 1%                   | N/A             |
| <b>Female</b>          |                      |                 |
| Female                 | 50%                  | 49%             |
| <b>Age</b>             |                      |                 |
| 0 to 17                | 24%                  | 22%             |
| 18 to 24               | 11%                  | 11%             |
| 25 to 34               | 16%                  | 18%             |
| 35 to 44               | 15%                  | 17%             |
| 45 to 54               | 17%                  | 18%             |
| 55 to 59               | 9%                   | 8%              |
| 60 to 64               | 7%                   | 6%              |
| <b>Census Division</b> |                      |                 |
| New England            | 5%                   | 3%              |
| Mid Atlantic           | 13%                  | 7%              |
| East North Central     | 15%                  | 16%             |
| West North Central     | 6%                   | 11%             |
| South Atlantic         | 20%                  | 22%             |
| East South Central     | 6%                   | 4%              |
| West South Central     | 12%                  | 18%             |
| Mountain               | 7%                   | 10%             |
| Pacific                | 16%                  | 9%              |

OLDW commercial includes people with both medical and prescription coverage; excludes people with unknown race/ethnicity, year of birth, or sex

Source: CPS ASEC (Current Population Survey—Annual Social and Economic Supplement), data for 2015, using <https://www.census.gov/cps/data/cpstablecreator.html>; Includes only people listed with a single race. Hispanic includes people of any single race who indicated they were of Hispanic origin

**Table A2: Medicare Advantage, 2015**

|                    | US Medicare Advantage | OLDW Medicare Advantage |
|--------------------|-----------------------|-------------------------|
| Race/ethnicity     |                       |                         |
| White              | 76%                   | 76%                     |
| Black              | 11%                   | 12%                     |
| Hispanic           | 8%                    | 9%                      |
| Other              | 6%                    | 3%                      |
| Female             | 55%                   | 57%                     |
| Census Division    |                       |                         |
| New England        | 3%                    | 6%                      |
| Mid Atlantic       | 15%                   | 15%                     |
| East North Central | 15%                   | 18%                     |
| West North Central | 6%                    | 12%                     |
| South Atlantic     | 20%                   | 31%                     |
| East South Central | 6%                    | 5%                      |
| West South Central | 10%                   | 4%                      |
| Mountain           | 7%                    | 5%                      |
| Pacific            | 18%                   | 3%                      |

OLDW Medicare Advantage includes people with both medical and prescription coverage; excludes people with unknown race/ethnicity or sex

US Medicare Advantage source: Kaiser Family Foundation, 2015 data  
<https://www.kff.org/state-category/medicare/medicare-advantage/>

## Appendix 2: Data access, cleaning, and sharing

Access to the OptumLabs Data Warehouse is carefully controlled to protect the privacy of beneficiaries. As a result, only Dr. Jeffery had access to beneficiary-level data. All authors had unlimited access to summarized data, such as that used to create the figures and tables.

Data cleaning: selection of opioid fills is described in Appendix 2. Selection of beneficiaries was based on enrollment data showing that they were either commercial enrollees with both medical and prescription drug coverage *or* Medicare Advantage enrollees with both medical and prescription drug coverage for whom fee-for-service Medicare was not recorded as the primary payer.

Data sharing: OptumLabs data are deidentified and available for research through a virtual data warehouse. OptumLabs has agreed to make the dataset for this study and the accompanying code available to interested researchers interested in replicating the findings through a virtual data warehouse. Interested researchers can contact the corresponding author for the manuscript and the author will facilitate access to the data and code for the researchers.

**Appendix 3: Opioid drugs included/excluded; MME conversion factors**

We identified all opioid drugs present in the table of NDC codes in OptumLabs Data Warehouse. For the purposes of this analysis, we classified tramadol as an opioid. We excluded DEA schedule 5 drugs (e.g., codeine cough syrups).

To limit the sample to drugs intended for home use, we excluded any injected or infused drug—those for which the dosage form was vial, syringe, ampule, cartridge, IV solution, etc.

We included only drugs which had a defined dose unit like a tablet, pill, mg/mL, etc. This excludes drugs in powder or bulk form.

We included both single drug formulations and combinations of drugs. Table A1 includes all opioid drug combinations found in the table of NDC codes. Both long-acting and short-acting formulations were included.

Conversion factors were taken from the CDC compilation<sup>1</sup> except for propoxyphene. The CDC uses a single conversion factor for all propoxyphene salts. However, according to the drug monograph, propoxyphene napsylate and propoxyphene hydrochloride have different doses for the same effect due to differences in the weight of the molecule. According to the monograph, a 65mg dose of the hydrochloride is equivalent to a 100mg dose of the napsylate.<sup>2</sup> The 0.23 conversion factor given for propoxyphene in the CDC compilation applies to the HCl salt: 130 mg propoxyphene HCl=30 mg morphine. With 65mg propoxyphene HCl=100mg propoxyphene napsylate, this implies a conversion factor to morphine of 0.15 for the napsylate, which is what we have used in the paper. Since the napsylate was far more common than the hydrochloride, this ends up being conservative relative to the CDC conversion factors—in other words, it reduces the total estimated MME of propoxyphene dispensed.

**Table A3 Opioid drugs and combinations included**

| Opioid               | Drug combinations included          | Long acting | Short acting | Conversion factor*        |
|----------------------|-------------------------------------|-------------|--------------|---------------------------|
| <b>Buprenorphine</b> | Buprenorphine                       | X           |              | 10<br>Patch version: 12.6 |
|                      | Buprenorphine/Naloxone              | X           |              | 10                        |
| <b>Butorphanol</b>   | Butorphanol                         |             | X            | 7                         |
| <b>Codeine</b>       | Codeine                             |             | X            | 0.15                      |
|                      | Codeine/Acetaminophen               |             | X            | 0.15                      |
|                      | Codeine/Acetaminophen/ Butabarbital |             | X            | 0.15                      |
|                      | Codeine/Acetaminophen/ Butalbital   |             | X            | 0.15                      |

| Opioid                          | Drug combinations included             | Long acting | Short acting | Conversion factor*                      |
|---------------------------------|----------------------------------------|-------------|--------------|-----------------------------------------|
|                                 | Codeine/Aspirin                        |             | X            | 0.15                                    |
|                                 | Codeine/Aspirin/Butalbital/ Caffeine   |             | X            | 0.15                                    |
|                                 | Codeine/Aspirin/Carisoprodol           |             | X            | 0.15                                    |
|                                 | Codeine/Aspirin/Phenacetin/ Caffeine   |             | X            | 0.15                                    |
| <b>Dihydrocodeine</b>           | Dihydrocodeine/Acetaminophen/ Caffeine |             | X            | 0.25                                    |
|                                 | Dihydrocodeine/Aspirin/Caffeine        |             | X            | 0.25                                    |
| <b>Fentanyl</b>                 | Fentanyl                               | X           | X            | LA: 0.72<br>SA: 0.13 - 0.18             |
| <b>Hydrocodone</b>              | Hydrocodone                            | X           | X            | 1                                       |
|                                 | Hydrocodone/Acetaminophen              |             | X            | 1                                       |
|                                 | Hydrocodone/Acetaminophen/Diet.Sup.11  |             | X            | 1                                       |
|                                 | Hydrocodone/Aspirin                    |             | X            | 1                                       |
|                                 | Hydrocodone/Ibuprofen                  |             | X            | 1                                       |
| <b>Hydromorphone</b>            | Hydromorphone                          | X           | X            | 4                                       |
| <b>Levomethadyl</b>             | Levomethadyl                           | X           |              | 8                                       |
| <b>Levorphanol</b>              | Levorphanol                            | X           |              | 11                                      |
| <b>Meperidine</b>               | Meperidine/Acetaminophen               |             | X            | 0.1                                     |
|                                 | Meperidine/Promethazine                |             | X            | 0.1                                     |
| <b>Methadone</b>                | Methadone                              | X           |              | 3                                       |
| <b>Morphine</b>                 | Morphine Sulfate                       | X           | X            | 1                                       |
|                                 | Morphine Sulfate/Naltrexone            | X           |              | 1                                       |
| <b>Opium</b>                    | Opium                                  |             | X            | 1                                       |
|                                 | Opium/Belladonna                       |             | X            | 1                                       |
| <b>Oxycodone</b>                | Oxycodone                              | X           | X            | 1.5                                     |
|                                 | Oxycodone/Acetaminophen                |             | X            | 1.5                                     |
|                                 | Oxycodone/Aspirin                      |             | X            | 1.5                                     |
|                                 | Oxycodone/Ibuprofen                    |             | X            | 1.5                                     |
| <b>Oxymorphone</b>              | Oxymorphone                            | X           | X            | 3                                       |
| <b>Pentazocine</b>              | Pentazocine/Acetaminophen              |             | X            | 0.37                                    |
|                                 | Pentazocine/Aspirin                    |             | X            | 0.37                                    |
|                                 | Pentazocine/Naloxone                   |             | X            | 0.37                                    |
| <b>Propoxyphene<sup>2</sup></b> | Propoxyphene                           |             | X            | 0.23 for HCl salt<br>0.15 for Napsylate |
|                                 | Propoxyphene/Acetaminophen             |             | X            | 0.23 for HCl salt<br>0.15 for Napsylate |
|                                 | Propoxyphene/Aspirin/Caffeine          |             | X            | 0.23 for HCl salt<br>0.15 for Napsylate |
| <b>Tapentadol</b>               | Tapentadol                             | X           | X            | 0.4                                     |
| <b>Tramadol</b>                 | Tramadol                               | X           | X            | 0.1                                     |
|                                 | Tramadol/Acetaminophen                 |             | X            | 0.1                                     |
|                                 | Tramadol/Dietary Supplement No. 11     |             | X            | 0.1                                     |

\* Factor used to convert mg of drug to mg of morphine equivalents<sup>1</sup>



**Appendix 4: Cohort flow charts**

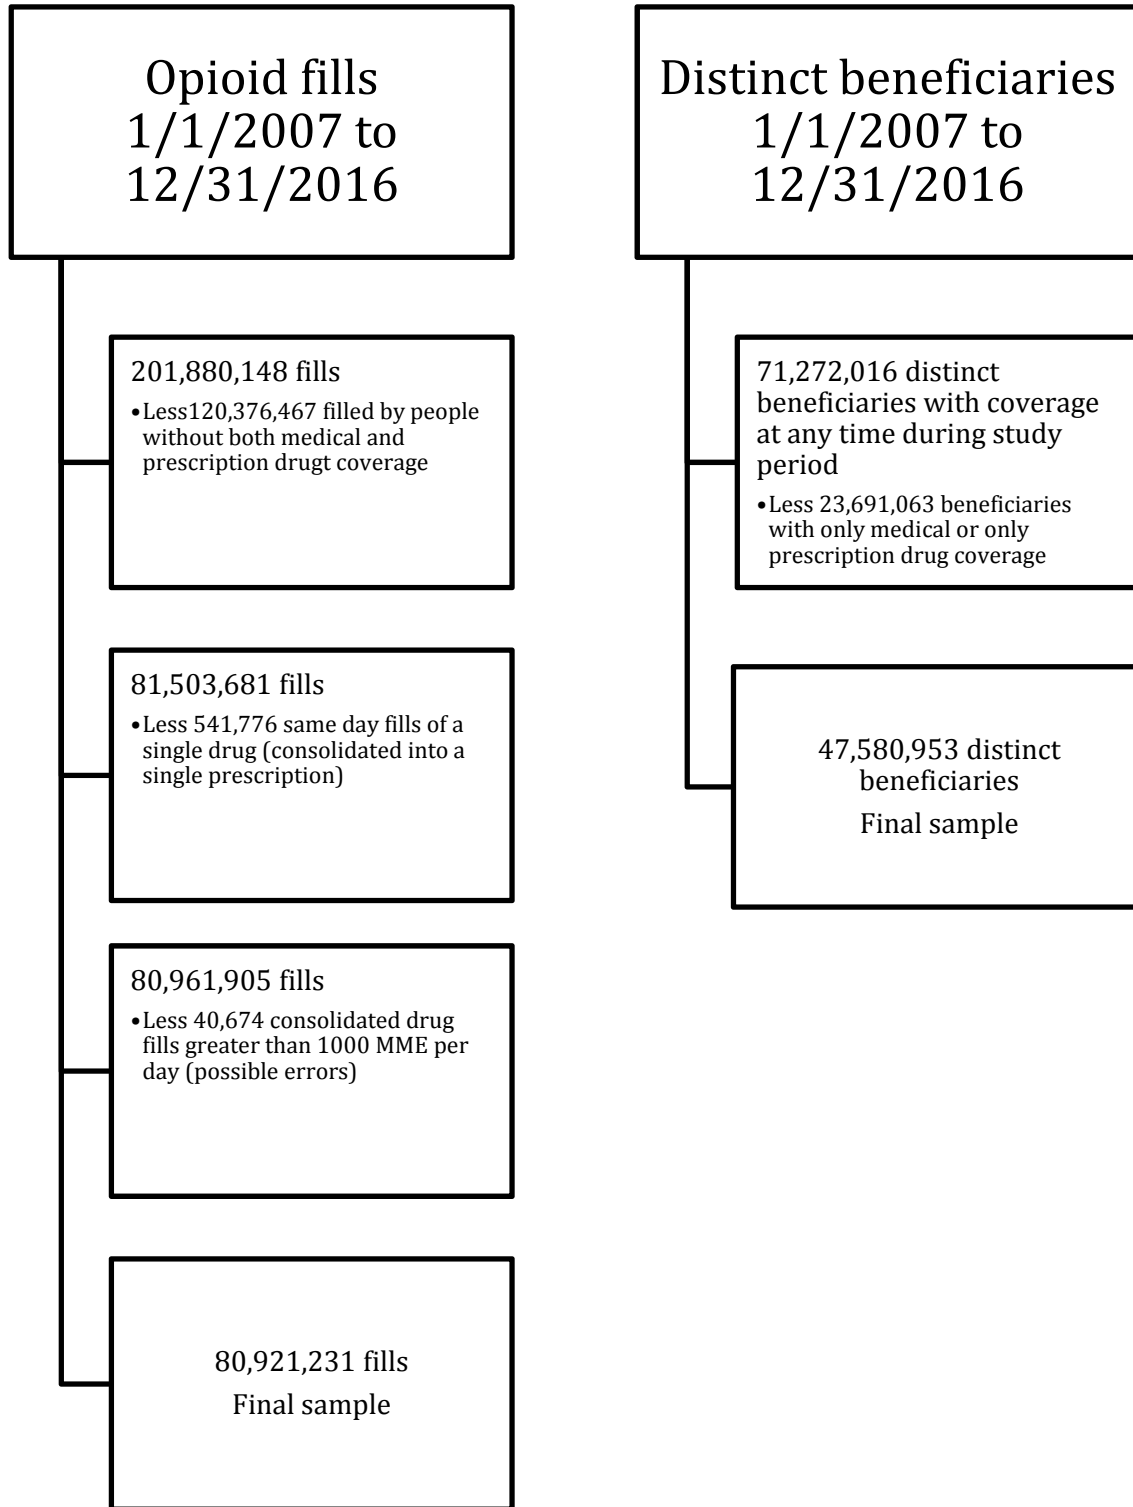

**Appendix 5:** Note on standard error calculations for marginal effects

Due to limits in computing resources, we did not calculate standard errors for marginal effect estimates of adjusted time trends in quarterly prevalence of opioid use or for age trends. In general with very large sample sizes, statistical significance becomes much less important than clinical significance; we expect that most differences in quarterly use prevalence are statistically significant at the 95% level, but many differences are so small as to be of limited clinical significance. We present the regression results with standard errors for reference.

**Appendix 6:** Elixhauser comorbidity prevalence**Table A4: Elixhauser comorbidities by beneficiary category**

| Elixhauser comorbidities               | Commercial | Aged Medicare | Disabled Medicare |
|----------------------------------------|------------|---------------|-------------------|
| Alcohol abuse                          | 1%         | 1%            | 2%                |
| Blood loss anemia                      | 0%         | 1%            | 0%                |
| Cardiac Arrhythmia                     | 6%         | 17%           | 8%                |
| Chronic Pulmonary disease              | 13%        | 15%           | 19%               |
| Coagulopathy                           | 1%         | 2%            | 2%                |
| Congestive heart failure               | 2%         | 10%           | 7%                |
| Deficiency anemia                      | 2%         | 3%            | 3%                |
| Depression                             | 11%        | 7%            | 17%               |
| Diabetes with chronic complications    | 3%         | 8%            | 10%               |
| Diabetes without chronic complications | 20%        | 28%           | 31%               |
| Drug abuse                             | 2%         | 0%            | 4%                |
| Fluid and electrolyte disorders        | 4%         | 7%            | 8%                |
| HIV/AIDS                               | 1%         | 0%            | 1%                |
| Hypothyroidism                         | 9%         | 10%           | 8%                |
| Liver disease                          | 2%         | 1%            | 4%                |
| Lymphoma                               | 1%         | 1%            | 1%                |
| Metastatic cancer                      | 1%         | 1%            | 1%                |
| Obesity                                | 6%         | 2%            | 8%                |
| Other neurological disorders           | 3%         | 5%            | 10%               |
| Paralysis                              | 0%         | 1%            | 2%                |
| Peptic ulcer                           | 0%         | 0%            | 0%                |
| Peripheral vascular disease            | 1%         | 7%            | 5%                |
| Psychosis                              | 1%         | 2%            | 6%                |
| Pulmonary Circulation Disorder         | 1%         | 2%            | 2%                |
| Renal failure                          | 2%         | 9%            | 6%                |
| Rheumatoid arthritis                   | 4%         | 4%            | 7%                |
| Solid tumor without metastasis         | 6%         | 8%            | 4%                |
| Uncomplicated hypertension             | 42%        | 65%           | 52%               |
| Valvular disease                       | 2%         | 5%            | 3%                |
| Weight Loss                            | 1%         | 2%            | 2%                |

Calculated quarterly on a rolling basis, looking back 6 months. Required 1 inpatient or 2 outpatient dates of service with diagnosis from list of ICD9 (2007 through 9/2015) and ICD10 (10/2015 through 2016) codes published in Quan et al.<sup>3</sup>

## Appendix 7: Regression results

Negative binomial regression

Number of obs 19,622,773

Wald chi2(150) 168972.44

Dispersion = mean

Prob > chi2 0.000

Log pseudolikelihood = -1.638e+08

Pseudo R2 0.0106

(Std. Err. adjusted for 5,754,195 clusters in optimum\_lab\_id)

**Dependent variable: Total MME in the quarter**

|                | IRR   | Std. Err. | z     | P>z   | [95% Conf. | Interval] |
|----------------|-------|-----------|-------|-------|------------|-----------|
| <b>yr</b>      |       |           |       |       |            |           |
| 2007           | (ref) |           |       |       |            |           |
| 2008           | 1.050 | 0.008     | 6.55  | 0.000 | 1.035      | 1.066     |
| 2009           | 1.122 | 0.010     | 13.17 | 0.000 | 1.103      | 1.141     |
| 2010           | 1.200 | 0.012     | 18.96 | 0.000 | 1.177      | 1.223     |
| 2011           | 1.167 | 0.012     | 15.32 | 0.000 | 1.144      | 1.191     |
| 2012           | 1.149 | 0.012     | 13.39 | 0.000 | 1.126      | 1.172     |
| 2013           | 1.168 | 0.012     | 14.75 | 0.000 | 1.144      | 1.193     |
| 2014           | 1.180 | 0.013     | 15.23 | 0.000 | 1.155      | 1.206     |
| 2015           | 1.168 | 0.013     | 13.89 | 0.000 | 1.143      | 1.194     |
| 2016           | 1.156 | 0.013     | 13.03 | 0.000 | 1.131      | 1.181     |
| <b>qrtr</b>    |       |           |       |       |            |           |
| 1              | (ref) |           |       |       |            |           |
| 2              | 1.033 | 0.005     | 7.26  | 0.000 | 1.024      | 1.042     |
| 3              | 1.048 | 0.006     | 8.23  | 0.000 | 1.037      | 1.060     |
| 4              | 1.085 | 0.007     | 12.55 | 0.000 | 1.071      | 1.099     |
| <b>yr#qrtr</b> |       |           |       |       |            |           |
| 2008#2         | 0.999 | 0.006     | -0.16 | 0.873 | 0.987      | 1.011     |
| 2008#3         | 1.001 | 0.008     | 0.17  | 0.866 | 0.985      | 1.018     |
| 2008#4         | 1.007 | 0.010     | 0.75  | 0.455 | 0.988      | 1.026     |
| 2009#2         | 0.985 | 0.006     | -2.41 | 0.016 | 0.974      | 0.997     |
| 2009#3         | 0.996 | 0.008     | -0.46 | 0.648 | 0.981      | 1.012     |
| 2009#4         | 0.996 | 0.009     | -0.39 | 0.697 | 0.979      | 1.014     |
| 2010#2         | 0.986 | 0.006     | -2.26 | 0.024 | 0.975      | 0.998     |
| 2010#3         | 0.970 | 0.008     | -3.78 | 0.000 | 0.956      | 0.986     |
| 2010#4         | 0.939 | 0.008     | -6.97 | 0.000 | 0.922      | 0.956     |
| 2011#2         | 0.984 | 0.006     | -2.69 | 0.007 | 0.972      | 0.996     |



|        | IRR   | Std. Err. | z     | P>z   | [95% Conf. | Interval] |
|--------|-------|-----------|-------|-------|------------|-----------|
| 2011#3 | 0.967 | 0.008     | -4.29 | 0.000 | 0.953      | 0.982     |
| 2011#4 | 0.939 | 0.008     | -7.15 | 0.000 | 0.922      | 0.955     |
| 2012#2 | 0.985 | 0.006     | -2.58 | 0.010 | 0.973      | 0.996     |
| 2012#3 | 0.973 | 0.007     | -3.54 | 0.000 | 0.959      | 0.988     |
| 2012#4 | 0.949 | 0.008     | -6.12 | 0.000 | 0.933      | 0.965     |
| 2013#2 | 0.972 | 0.006     | -4.7  | 0.000 | 0.961      | 0.984     |
| 2013#3 | 0.965 | 0.007     | -4.72 | 0.000 | 0.951      | 0.979     |
| 2013#4 | 0.939 | 0.008     | -7.31 | 0.000 | 0.923      | 0.955     |
| 2014#2 | 0.983 | 0.006     | -2.79 | 0.005 | 0.971      | 0.995     |
| 2014#3 | 0.961 | 0.008     | -5.03 | 0.000 | 0.947      | 0.976     |
| 2014#4 | 0.923 | 0.008     | -8.9  | 0.000 | 0.907      | 0.940     |
| 2015#2 | 0.986 | 0.006     | -2.29 | 0.022 | 0.974      | 0.998     |
| 2015#3 | 0.959 | 0.007     | -5.42 | 0.000 | 0.944      | 0.973     |
| 2015#4 | 0.935 | 0.008     | -7.64 | 0.000 | 0.919      | 0.951     |
| 2016#2 | 0.998 | 0.006     | -0.41 | 0.680 | 0.986      | 1.009     |
| 2016#3 | 0.971 | 0.007     | -3.93 | 0.000 | 0.957      | 0.985     |
| 2016#4 | 0.933 | 0.008     | -8.15 | 0.000 | 0.917      | 0.949     |

**bene\_cat**

|           |       |       |       |       |       |       |
|-----------|-------|-------|-------|-------|-------|-------|
| com       | (ref) |       |       |       |       |       |
| aged_mcr  | 1.541 | 0.030 | 22.05 | 0.000 | 1.483 | 1.602 |
| disab_mcr | 3.165 | 0.054 | 67.42 | 0.000 | 3.061 | 3.273 |

**yr#bene\_cat**

|                |       |       |        |       |       |       |
|----------------|-------|-------|--------|-------|-------|-------|
| 2008#aged_mcr  | 0.994 | 0.011 | -0.49  | 0.622 | 0.972 | 1.017 |
| 2008#disab_mcr | 1.028 | 0.016 | 1.81   | 0.070 | 0.998 | 1.059 |
| 2009#aged_mcr  | 0.938 | 0.012 | -5.01  | 0.000 | 0.915 | 0.962 |
| 2009#disab_mcr | 1.020 | 0.017 | 1.15   | 0.250 | 0.986 | 1.055 |
| 2010#aged_mcr  | 0.807 | 0.011 | -16.09 | 0.000 | 0.787 | 0.829 |
| 2010#disab_mcr | 0.969 | 0.017 | -1.75  | 0.081 | 0.936 | 1.004 |
| 2011#aged_mcr  | 0.791 | 0.011 | -17.1  | 0.000 | 0.770 | 0.813 |
| 2011#disab_mcr | 1.047 | 0.019 | 2.51   | 0.012 | 1.010 | 1.085 |
| 2012#aged_mcr  | 0.834 | 0.011 | -13.19 | 0.000 | 0.812 | 0.857 |
| 2012#disab_mcr | 1.099 | 0.020 | 5.19   | 0.000 | 1.061 | 1.139 |
| 2013#aged_mcr  | 0.827 | 0.011 | -13.87 | 0.000 | 0.805 | 0.849 |
| 2013#disab_mcr | 1.067 | 0.020 | 3.53   | 0.000 | 1.029 | 1.106 |
| 2014#aged_mcr  | 0.843 | 0.012 | -12.31 | 0.000 | 0.820 | 0.866 |
| 2014#disab_mcr | 1.014 | 0.019 | 0.75   | 0.451 | 0.978 | 1.052 |
| 2015#aged_mcr  | 0.859 | 0.012 | -10.9  | 0.000 | 0.836 | 0.883 |

|                         | <b>IRR</b> | <b>Std. Err.</b> | <b>z</b> | <b>P&gt;z</b> | <b>[95% Conf.</b> | <b>Interval]</b> |
|-------------------------|------------|------------------|----------|---------------|-------------------|------------------|
| 2015#disab_mcr          | 1.032      | 0.019            | 1.71     | 0.087         | 0.995             | 1.071            |
| 2016#aged_mcr           | 0.881      | 0.012            | -9.37    | 0.000         | 0.858             | 0.905            |
| 2016#disab_mcr          | 0.936      | 0.017            | -3.62    | 0.000         | 0.903             | 0.970            |
| <b>qrtr#bene_cat</b>    |            |                  |          |               |                   |                  |
| 2#aged_mcr              | 0.981      | 0.008            | -2.42    | 0.016         | 0.967             | 0.996            |
| 2#disab_mcr             | 0.995      | 0.010            | -0.52    | 0.604         | 0.975             | 1.015            |
| 3#aged_mcr              | 0.975      | 0.009            | -2.66    | 0.008         | 0.957             | 0.993            |
| 3#disab_mcr             | 0.967      | 0.012            | -2.77    | 0.006         | 0.944             | 0.990            |
| 4#aged_mcr              | 0.950      | 0.010            | -4.98    | 0.000         | 0.931             | 0.969            |
| 4#disab_mcr             | 0.955      | 0.013            | -3.45    | 0.001         | 0.930             | 0.980            |
| <b>yr#qrtr#bene_cat</b> |            |                  |          |               |                   |                  |
| 2008#2#aged_mcr         | 1.002      | 0.011            | 0.23     | 0.819         | 0.982             | 1.023            |
| 2008#2#disab_mcr        | 1.019      | 0.014            | 1.34     | 0.179         | 0.992             | 1.046            |
| 2008#3#aged_mcr         | 1.013      | 0.013            | 1        | 0.319         | 0.987             | 1.040            |
| 2008#3#disab_mcr        | 1.045      | 0.018            | 2.6      | 0.009         | 1.011             | 1.081            |
| 2008#4#aged_mcr         | 1.026      | 0.015            | 1.7      | 0.090         | 0.996             | 1.056            |
| 2008#4#disab_mcr        | 1.046      | 0.020            | 2.34     | 0.019         | 1.007             | 1.087            |
| 2009#2#aged_mcr         | 0.971      | 0.010            | -2.94    | 0.003         | 0.952             | 0.990            |
| 2009#2#disab_mcr        | 0.997      | 0.012            | -0.2     | 0.838         | 0.973             | 1.022            |
| 2009#3#aged_mcr         | 0.944      | 0.012            | -4.71    | 0.000         | 0.921             | 0.967            |
| 2009#3#disab_mcr        | 1.003      | 0.015            | 0.19     | 0.851         | 0.973             | 1.033            |
| 2009#4#aged_mcr         | 0.904      | 0.012            | -7.33    | 0.000         | 0.880             | 0.929            |
| 2009#4#disab_mcr        | 0.981      | 0.017            | -1.12    | 0.264         | 0.949             | 1.014            |
| 2010#2#aged_mcr         | 1.013      | 0.010            | 1.36     | 0.172         | 0.994             | 1.032            |
| 2010#2#disab_mcr        | 1.013      | 0.012            | 1.13     | 0.260         | 0.990             | 1.037            |
| 2010#3#aged_mcr         | 1.027      | 0.012            | 2.31     | 0.021         | 1.004             | 1.051            |
| 2010#3#disab_mcr        | 1.037      | 0.015            | 2.51     | 0.012         | 1.008             | 1.067            |
| 2010#4#aged_mcr         | 1.029      | 0.013            | 2.21     | 0.027         | 1.003             | 1.055            |
| 2010#4#disab_mcr        | 1.062      | 0.017            | 3.76     | 0.000         | 1.029             | 1.096            |
| 2011#2#aged_mcr         | 1.009      | 0.009            | 0.97     | 0.334         | 0.991             | 1.027            |
| 2011#2#disab_mcr        | 1.022      | 0.012            | 1.93     | 0.054         | 1.000             | 1.045            |
| 2011#3#aged_mcr         | 1.020      | 0.012            | 1.76     | 0.079         | 0.998             | 1.043            |
| 2011#3#disab_mcr        | 1.043      | 0.015            | 3        | 0.003         | 1.015             | 1.072            |
| 2011#4#aged_mcr         | 1.045      | 0.013            | 3.5      | 0.000         | 1.020             | 1.071            |
| 2011#4#disab_mcr        | 1.047      | 0.016            | 2.97     | 0.003         | 1.016             | 1.080            |
| 2012#2#aged_mcr         | 1.009      | 0.009            | 0.93     | 0.351         | 0.991             | 1.027            |
| 2012#2#disab_mcr        | 1.000      | 0.011            | -0.01    | 0.992         | 0.978             | 1.022            |

|                  | IRR   | Std. Err. | z     | P>z   | [95% Conf. | Interval] |
|------------------|-------|-----------|-------|-------|------------|-----------|
| 2012#3#aged_mcr  | 1.006 | 0.011     | 0.54  | 0.587 | 0.984      | 1.028     |
| 2012#3#disab_mcr | 1.011 | 0.014     | 0.76  | 0.450 | 0.983      | 1.038     |
| 2012#4#aged_mcr  | 1.026 | 0.013     | 2.1   | 0.036 | 1.002      | 1.051     |
| 2012#4#disab_mcr | 1.018 | 0.016     | 1.14  | 0.253 | 0.988      | 1.048     |
| 2013#2#aged_mcr  | 0.998 | 0.009     | -0.22 | 0.829 | 0.981      | 1.016     |
| 2013#2#disab_mcr | 0.982 | 0.011     | -1.6  | 0.110 | 0.961      | 1.004     |
| 2013#3#aged_mcr  | 0.994 | 0.011     | -0.53 | 0.597 | 0.973      | 1.016     |
| 2013#3#disab_mcr | 0.981 | 0.013     | -1.38 | 0.167 | 0.955      | 1.008     |
| 2013#4#aged_mcr  | 1.016 | 0.012     | 1.31  | 0.191 | 0.992      | 1.041     |
| 2013#4#disab_mcr | 0.983 | 0.015     | -1.16 | 0.247 | 0.954      | 1.012     |
| 2014#2#aged_mcr  | 0.995 | 0.009     | -0.6  | 0.550 | 0.977      | 1.013     |
| 2014#2#disab_mcr | 1.000 | 0.011     | 0.02  | 0.982 | 0.978      | 1.023     |
| 2014#3#aged_mcr  | 1.005 | 0.011     | 0.47  | 0.637 | 0.983      | 1.028     |
| 2014#3#disab_mcr | 1.027 | 0.014     | 1.96  | 0.051 | 1.000      | 1.056     |
| 2014#4#aged_mcr  | 1.049 | 0.013     | 3.82  | 0.000 | 1.023      | 1.075     |
| 2014#4#disab_mcr | 1.057 | 0.016     | 3.59  | 0.000 | 1.025      | 1.089     |
| 2015#2#aged_mcr  | 0.994 | 0.009     | -0.7  | 0.481 | 0.976      | 1.012     |
| 2015#2#disab_mcr | 0.982 | 0.011     | -1.6  | 0.110 | 0.961      | 1.004     |
| 2015#3#aged_mcr  | 1.009 | 0.011     | 0.82  | 0.410 | 0.987      | 1.032     |
| 2015#3#disab_mcr | 1.008 | 0.014     | 0.59  | 0.553 | 0.981      | 1.036     |
| 2015#4#aged_mcr  | 1.037 | 0.013     | 2.98  | 0.003 | 1.013      | 1.063     |
| 2015#4#disab_mcr | 1.021 | 0.016     | 1.36  | 0.175 | 0.991      | 1.052     |
| 2016#2#aged_mcr  | 1.014 | 0.009     | 1.57  | 0.117 | 0.997      | 1.032     |
| 2016#2#disab_mcr | 0.999 | 0.011     | -0.11 | 0.910 | 0.977      | 1.021     |
| 2016#3#aged_mcr  | 1.022 | 0.011     | 2     | 0.045 | 1.000      | 1.044     |
| 2016#3#disab_mcr | 1.020 | 0.014     | 1.47  | 0.140 | 0.993      | 1.047     |
| 2016#4#aged_mcr  | 1.052 | 0.013     | 4.24  | 0.000 | 1.028      | 1.077     |
| 2016#4#disab_mcr | 1.037 | 0.015     | 2.47  | 0.014 | 1.008      | 1.068     |

**Coverage cohort (first year of insurance coverage)**

|          |       |       |        |       |       |       |
|----------|-------|-------|--------|-------|-------|-------|
| pre-2007 | (ref) |       |        |       |       |       |
| 2007     | 0.995 | 0.011 | -0.51  | 0.609 | 0.974 | 1.016 |
| 2008     | 1.000 | 0.010 | -0.02  | 0.980 | 0.981 | 1.019 |
| 2009     | 0.971 | 0.009 | -3.2   | 0.001 | 0.953 | 0.989 |
| 2010     | 0.968 | 0.009 | -3.56  | 0.000 | 0.951 | 0.985 |
| 2011     | 0.988 | 0.009 | -1.27  | 0.205 | 0.971 | 1.006 |
| 2012     | 0.979 | 0.009 | -2.28  | 0.023 | 0.961 | 0.997 |
| 2013     | 0.957 | 0.009 | -4.69  | 0.000 | 0.940 | 0.975 |
| 2014     | 0.896 | 0.008 | -11.73 | 0.000 | 0.880 | 0.913 |

|                        | IRR    | Std. Err.  | z      | P>z   | [95% Conf. | Interval] |
|------------------------|--------|------------|--------|-------|------------|-----------|
| 2015                   | 0.903  | 0.009      | -10.75 | 0.000 | 0.886      | 0.920     |
| 2016                   | 0.916  | 0.009      | -8.93  | 0.000 | 0.899      | 0.934     |
| <b>1.female</b>        | 0.866  | 0.004      | -32.98 | 0.000 | 0.859      | 0.874     |
| <b>Age</b>             |        |            |        |       |            |           |
| 0-18                   | 0.188  | 0.002      | -159.5 | 0.000 | 0.184      | 0.192     |
| 19-34                  | 0.625  | 0.006      | -49.68 | 0.000 | 0.613      | 0.636     |
| 35-44                  | (ref)  |            |        |       |            |           |
| 45-54                  | 1.199  | 0.010      | 22.19  | 0.000 | 1.180      | 1.218     |
| 55-64                  | 1.022  | 0.009      | 2.5    | 0.013 | 1.005      | 1.039     |
| 65-74                  | 0.939  | 0.016      | -3.68  | 0.000 | 0.908      | 0.971     |
| 75+                    | 0.701  | 0.013      | -19.84 | 0.000 | 0.677      | 0.726     |
| unk                    | 1.574  | 0.902      | 0.79   | 0.429 | 0.512      | 4.837     |
| <b>Race/ethnicity</b>  |        |            |        |       |            |           |
| White                  | (ref)  |            |        |       |            |           |
| Black                  | 0.786  | 0.005      | -38.98 | 0.000 | 0.776      | 0.795     |
| Hispanic               | 0.716  | 0.007      | -36.65 | 0.000 | 0.703      | 0.728     |
| Asian                  | 0.598  | 0.014      | -22.79 | 0.000 | 0.572      | 0.625     |
| Unknown/other          | 0.922  | 0.008      | -9.14  | 0.000 | 0.906      | 0.938     |
| <b>Census Division</b> |        |            |        |       |            |           |
| New England            | (ref)  |            |        |       |            |           |
| Mid Atlantic           | 0.965  | 0.013      | -2.61  | 0.009 | 0.939      | 0.991     |
| East North Central     | 0.817  | 0.010      | -16.94 | 0.000 | 0.798      | 0.836     |
| West North Central     | 0.740  | 0.010      | -23.13 | 0.000 | 0.722      | 0.759     |
| South Atlantic         | 0.937  | 0.011      | -5.69  | 0.000 | 0.916      | 0.958     |
| East South Central     | 0.915  | 0.012      | -6.9   | 0.000 | 0.892      | 0.938     |
| West South Central     | 0.774  | 0.010      | -19.65 | 0.000 | 0.755      | 0.794     |
| Mountain               | 1.086  | 0.015      | 6.13   | 0.000 | 1.057      | 1.114     |
| Pacific                | 0.993  | 0.014      | -0.5   | 0.619 | 0.965      | 1.022     |
| Unk/Other              | 0.822  | 0.040      | -4.02  | 0.000 | 0.747      | 0.904     |
| _cons                  | 20.984 | 0.304      | 209.82 | 0.000 | 20.396     | 21.589    |
| ln(tot_person_days)    | 1.000  | (exposure) |        |       |            |           |
| /lnalpha               | 0.648  | 0.001      |        |       | 0.646      | 0.650     |

|       | <b>IRR</b> | <b>Std. Err.</b> | <b>z</b> | <b>P&gt;z</b> | <b>[95% Conf.</b> | <b>Interval]</b> |
|-------|------------|------------------|----------|---------------|-------------------|------------------|
| alpha | 1.912      | 0.002            |          |               | 1.908             | 1.916            |



|                    | Odds Ratio | Std. Err. | z      | P>z   | [95% Conf. | Interval] |
|--------------------|------------|-----------|--------|-------|------------|-----------|
| 2011#4             | 0.981      | 0.002     | -9.90  | 0.000 | 0.977      | 0.985     |
| 2012#2             | 0.969      | 0.002     | -15.18 | 0.000 | 0.965      | 0.973     |
| 2012#3             | 0.977      | 0.002     | -10.86 | 0.000 | 0.973      | 0.981     |
| 2012#4             | 0.979      | 0.002     | -10.74 | 0.000 | 0.975      | 0.983     |
| 2013#2             | 0.972      | 0.002     | -13.50 | 0.000 | 0.968      | 0.976     |
| 2013#3             | 0.976      | 0.002     | -11.42 | 0.000 | 0.972      | 0.980     |
| 2013#4             | 0.996      | 0.002     | -1.82  | 0.069 | 0.992      | 1.000     |
| 2014#2             | 0.950      | 0.002     | -23.69 | 0.000 | 0.946      | 0.954     |
| 2014#3             | 0.919      | 0.002     | -37.80 | 0.000 | 0.915      | 0.923     |
| 2014#4             | 1.021      | 0.002     | 10.29  | 0.000 | 1.017      | 1.025     |
| 2015#2             | 1.060      | 0.002     | 26.91  | 0.000 | 1.056      | 1.065     |
| 2015#3             | 1.064      | 0.002     | 27.78  | 0.000 | 1.059      | 1.068     |
| 2015#4             | 0.994      | 0.002     | -2.89  | 0.004 | 0.990      | 0.998     |
| 2016#2             | 0.959      | 0.002     | -19.51 | 0.000 | 0.955      | 0.963     |
| 2016#3             | 0.963      | 0.002     | -17.24 | 0.000 | 0.959      | 0.967     |
| 2016#4             |            |           |        |       |            |           |
| <b>bene_cat</b>    | (ref)      |           |        |       |            |           |
| com                | 1.040      | 0.005     | 7.61   | 0.000 | 1.030      | 1.051     |
| aged_mcr           | 3.377      | 0.030     | 135.71 | 0.000 | 3.318      | 3.437     |
| disab_mcr          |            |           |        |       |            |           |
| <b>yr#bene_cat</b> | 1.049      | 0.005     | 9.58   | 0.000 | 1.039      | 1.060     |
| 2008#aged_mcr      | 1.124      | 0.010     | 12.73  | 0.000 | 1.104      | 1.144     |
| 2008#disab_mcr     | 1.038      | 0.005     | 7.38   | 0.000 | 1.028      | 1.049     |
| 2009#aged_mcr      | 1.314      | 0.013     | 28.53  | 0.000 | 1.289      | 1.339     |
| 2009#disab_mcr     | 1.157      | 0.006     | 28.97  | 0.000 | 1.146      | 1.169     |
| 2010#aged_mcr      | 1.491      | 0.014     | 41.40  | 0.000 | 1.463      | 1.519     |
| 2010#disab_mcr     | 1.252      | 0.006     | 44.52  | 0.000 | 1.240      | 1.265     |
| 2011#aged_mcr      | 1.726      | 0.017     | 55.95  | 0.000 | 1.694      | 1.760     |
| 2011#disab_mcr     | 1.238      | 0.006     | 42.36  | 0.000 | 1.225      | 1.250     |
| 2012#aged_mcr      | 1.783      | 0.017     | 59.53  | 0.000 | 1.749      | 1.817     |
| 2012#disab_mcr     | 1.328      | 0.007     | 56.56  | 0.000 | 1.315      | 1.341     |
| 2013#aged_mcr      | 1.872      | 0.018     | 64.74  | 0.000 | 1.836      | 1.908     |
| 2013#disab_mcr     | 1.311      | 0.007     | 53.64  | 0.000 | 1.299      | 1.325     |
| 2014#aged_mcr      | 1.889      | 0.018     | 65.17  | 0.000 | 1.853      | 1.925     |
| 2014#disab_mcr     | 1.405      | 0.007     | 67.18  | 0.000 | 1.391      | 1.419     |
| 2015#aged_mcr      | 2.068      | 0.020     | 73.98  | 0.000 | 2.029      | 2.108     |

|                         | Odds Ratio | Std. Err. | z      | P>z   | [95% Conf. | Interval] |
|-------------------------|------------|-----------|--------|-------|------------|-----------|
| 2015#disab_mcr          | 1.517      | 0.008     | 84.20  | 0.000 | 1.502      | 1.532     |
| 2016#aged_mcr           | 2.133      | 0.020     | 79.19  | 0.000 | 2.093      | 2.173     |
| 2016#disab_mcr          |            |           |        |       |            |           |
| <b>qrtr#bene_cat</b>    |            |           |        |       |            |           |
| 2#aged_mcr              | 1.029      | 0.005     | 6.47   | 0.000 | 1.020      | 1.038     |
| 2#disab_mcr             | 1.045      | 0.008     | 5.83   | 0.000 | 1.029      | 1.060     |
| 3#aged_mcr              | 1.047      | 0.005     | 9.68   | 0.000 | 1.037      | 1.057     |
| 3#disab_mcr             | 1.079      | 0.009     | 9.22   | 0.000 | 1.062      | 1.096     |
| 4#aged_mcr              | 1.169      | 0.006     | 32.04  | 0.000 | 1.157      | 1.180     |
| 4#disab_mcr             | 1.156      | 0.010     | 16.98  | 0.000 | 1.137      | 1.176     |
| <b>yr#qrtr#bene_cat</b> |            |           |        |       |            |           |
| 2008#2#aged_mcr         | 0.995      | 0.006     | -0.78  | 0.437 | 0.984      | 1.007     |
| 2008#2#disab_mcr        | 0.987      | 0.010     | -1.25  | 0.210 | 0.968      | 1.007     |
| 2008#3#aged_mcr         | 1.007      | 0.007     | 1.02   | 0.307 | 0.994      | 1.020     |
| 2008#3#disab_mcr        | 0.992      | 0.011     | -0.73  | 0.462 | 0.970      | 1.014     |
| 2008#4#aged_mcr         | 0.902      | 0.006     | -15.09 | 0.000 | 0.890      | 0.914     |
| 2008#4#disab_mcr        | 0.944      | 0.011     | -4.88  | 0.000 | 0.922      | 0.966     |
| 2009#2#aged_mcr         | 1.015      | 0.006     | 2.75   | 0.006 | 1.004      | 1.026     |
| 2009#2#disab_mcr        | 1.008      | 0.009     | 0.87   | 0.383 | 0.990      | 1.027     |
| 2009#3#aged_mcr         | 1.018      | 0.006     | 2.97   | 0.003 | 1.006      | 1.030     |
| 2009#3#disab_mcr        | 0.997      | 0.010     | -0.33  | 0.738 | 0.977      | 1.017     |
| 2009#4#aged_mcr         | 0.905      | 0.006     | -16.22 | 0.000 | 0.894      | 0.916     |
| 2009#4#disab_mcr        | 0.934      | 0.010     | -6.45  | 0.000 | 0.915      | 0.954     |
| 2010#2#aged_mcr         | 1.013      | 0.005     | 2.52   | 0.012 | 1.003      | 1.024     |
| 2010#2#disab_mcr        | 0.975      | 0.009     | -2.84  | 0.004 | 0.959      | 0.992     |
| 2010#3#aged_mcr         | 0.995      | 0.006     | -0.94  | 0.347 | 0.984      | 1.006     |
| 2010#3#disab_mcr        | 0.959      | 0.009     | -4.31  | 0.000 | 0.941      | 0.978     |
| 2010#4#aged_mcr         | 0.889      | 0.005     | -20.23 | 0.000 | 0.879      | 0.899     |
| 2010#4#disab_mcr        | 0.891      | 0.009     | -11.56 | 0.000 | 0.874      | 0.908     |
| 2011#2#aged_mcr         | 1.003      | 0.005     | 0.56   | 0.573 | 0.993      | 1.013     |
| 2011#2#disab_mcr        | 0.965      | 0.008     | -4.12  | 0.000 | 0.949      | 0.982     |
| 2011#3#aged_mcr         | 0.973      | 0.005     | -4.97  | 0.000 | 0.962      | 0.983     |
| 2011#3#disab_mcr        | 0.929      | 0.009     | -7.76  | 0.000 | 0.912      | 0.947     |
| 2011#4#aged_mcr         | 0.863      | 0.005     | -25.73 | 0.000 | 0.853      | 0.873     |
| 2011#4#disab_mcr        | 0.866      | 0.009     | -14.62 | 0.000 | 0.850      | 0.883     |
| 2012#2#aged_mcr         | 1.001      | 0.005     | 0.19   | 0.847 | 0.991      | 1.011     |
| 2012#2#disab_mcr        | 0.966      | 0.008     | -4.06  | 0.000 | 0.951      | 0.982     |



|                  | Odds Ratio | Std. Err. | z      | P>z   | [95% Conf. | Interval] |
|------------------|------------|-----------|--------|-------|------------|-----------|
| 2012#2#disab_mcr | 0.987      | 0.005     | -2.32  | 0.020 | 0.977      | 0.998     |
| 2012#3#aged_mcr  | 0.945      | 0.009     | -6.08  | 0.000 | 0.928      | 0.963     |
| 2012#3#disab_mcr | 0.874      | 0.005     | -23.83 | 0.000 | 0.865      | 0.884     |
| 2012#4#aged_mcr  | 0.862      | 0.008     | -15.46 | 0.000 | 0.846      | 0.878     |
| 2012#4#disab_mcr | 1.002      | 0.005     | 0.35   | 0.724 | 0.992      | 1.012     |
| 2013#2#aged_mcr  | 0.970      | 0.008     | -3.65  | 0.000 | 0.954      | 0.986     |
| 2013#2#disab_mcr | 0.986      | 0.005     | -2.50  | 0.012 | 0.976      | 0.997     |
| 2013#3#aged_mcr  | 0.936      | 0.009     | -7.24  | 0.000 | 0.919      | 0.953     |
| 2013#3#disab_mcr | 0.874      | 0.005     | -24.26 | 0.000 | 0.864      | 0.883     |
| 2013#4#aged_mcr  | 0.859      | 0.008     | -15.96 | 0.000 | 0.844      | 0.876     |
| 2013#4#disab_mcr | 1.010      | 0.005     | 1.88   | 0.059 | 1.000      | 1.020     |
| 2014#2#aged_mcr  | 0.949      | 0.008     | -6.31  | 0.000 | 0.933      | 0.964     |
| 2014#2#disab_mcr | 1.022      | 0.006     | 4.00   | 0.000 | 1.011      | 1.033     |
| 2014#3#aged_mcr  | 0.948      | 0.009     | -5.84  | 0.000 | 0.931      | 0.965     |
| 2014#3#disab_mcr | 0.905      | 0.005     | -17.89 | 0.000 | 0.895      | 0.915     |
| 2014#4#aged_mcr  | 0.871      | 0.008     | -14.50 | 0.000 | 0.855      | 0.887     |
| 2014#4#disab_mcr | 0.972      | 0.005     | -5.72  | 0.000 | 0.962      | 0.981     |
| 2015#2#aged_mcr  | 0.934      | 0.008     | -8.19  | 0.000 | 0.919      | 0.949     |
| 2015#2#disab_mcr | 0.915      | 0.005     | -16.37 | 0.000 | 0.905      | 0.925     |
| 2015#3#aged_mcr  | 0.869      | 0.008     | -15.27 | 0.000 | 0.854      | 0.885     |
| 2015#3#disab_mcr | 0.801      | 0.004     | -39.92 | 0.000 | 0.792      | 0.810     |
| 2015#4#aged_mcr  | 0.789      | 0.008     | -24.84 | 0.000 | 0.775      | 0.804     |
| 2015#4#disab_mcr | 0.959      | 0.005     | -8.60  | 0.000 | 0.949      | 0.968     |
| 2016#2#aged_mcr  | 0.942      | 0.008     | -7.35  | 0.000 | 0.927      | 0.957     |
| 2016#2#disab_mcr | 0.953      | 0.005     | -9.00  | 0.000 | 0.943      | 0.963     |
| 2016#3#aged_mcr  | 0.925      | 0.008     | -8.74  | 0.000 | 0.909      | 0.941     |
| 2016#3#disab_mcr | 0.830      | 0.005     | -34.24 | 0.000 | 0.822      | 0.839     |
| 2016#4#aged_mcr  | 0.822      | 0.008     | -21.18 | 0.000 | 0.807      | 0.837     |
| 2016#4#disab_mcr |            |           |        |       |            |           |

**Coverage cohort (first year of insurance coverage)**

|          |       |       |        |       |       |       |
|----------|-------|-------|--------|-------|-------|-------|
| pre-2007 | 0.965 | 0.002 | -21.78 | 0.000 | 0.962 | 0.968 |
| 2007     | 0.991 | 0.002 | -4.80  | 0.000 | 0.988 | 0.995 |
| 2008     | 0.917 | 0.002 | -46.06 | 0.000 | 0.913 | 0.920 |
| 2009     | 0.948 | 0.002 | -28.36 | 0.000 | 0.945 | 0.952 |
| 2010     | 0.952 | 0.002 | -25.34 | 0.000 | 0.948 | 0.955 |
| 2011     | 0.885 | 0.002 | -59.83 | 0.000 | 0.882 | 0.889 |
| 2012     | 0.926 | 0.002 | -37.53 | 0.000 | 0.922 | 0.929 |

|                        | Odds Ratio | Std. Err. | z       | P>z   | [95% Conf. Interval] |
|------------------------|------------|-----------|---------|-------|----------------------|
| 2013                   | 0.871      | 0.002     | -65.73  | 0.000 | 0.868 0.875          |
| 2014                   | 0.812      | 0.002     | -99.68  | 0.000 | 0.809 0.815          |
| 2015                   | 0.982      | 0.002     | -7.76   | 0.000 | 0.977 0.986          |
| 2016                   |            |           |         |       |                      |
| <b>1.female</b>        | 1.331      | 0.001     | 323.36  | 0.000 | 1.328 1.333          |
| <b>Age</b>             |            |           |         |       |                      |
| 0-18                   | 0.150      | 0.000     | 1339.31 | 0.000 | 0.150 0.151          |
| 19-34                  | 0.739      | 0.001     | -272.66 | 0.000 | 0.737 0.740          |
| 35-44                  | (ref)      |           |         |       |                      |
| 45-54                  | 1.205      | 0.001     | 152.79  | 0.000 | 1.202 1.208          |
| 55-64                  | 1.328      | 0.002     | 202.68  | 0.000 | 1.324 1.332          |
| 65-74                  | 1.459      | 0.004     | 139.65  | 0.000 | 1.451 1.466          |
| 75+                    | 1.452      | 0.005     | 111.08  | 0.000 | 1.442 1.461          |
| unk                    | 0.659      | 0.125     | -2.19   | 0.028 | 0.454 0.956          |
| <b>Race/ethnicity</b>  | (ref)      |           |         |       |                      |
| White                  | 1.016      | 0.001     | 10.88   | 0.000 | 1.013 1.019          |
| Black                  | 0.772      | 0.001     | -172.64 | 0.000 | 0.770 0.774          |
| Hispanic               | 0.467      | 0.001     | -292.09 | 0.000 | 0.465 0.469          |
| Asian                  | 0.797      | 0.002     | -117.62 | 0.000 | 0.794 0.800          |
| Unknown/other          |            |           |         |       |                      |
| <b>Census Division</b> | (ref)      |           |         |       |                      |
| New England            | 0.871      | 0.003     | -44.41  | 0.000 | 0.865 0.876          |
| Mid Atlantic           | 1.281      | 0.004     | 88.76   | 0.000 | 1.274 1.288          |
| East North Central     | 1.097      | 0.003     | 31.82   | 0.000 | 1.091 1.104          |
| West North Central     | 1.422      | 0.004     | 131.00  | 0.000 | 1.414 1.429          |
| South Atlantic         | 1.897      | 0.006     | 198.77  | 0.000 | 1.885 1.909          |
| East South Central     | 1.589      | 0.004     | 167.02  | 0.000 | 1.581 1.598          |
| West South Central     | 1.462      | 0.004     | 129.09  | 0.000 | 1.454 1.471          |
| Mountain               | 1.189      | 0.004     | 56.07   | 0.000 | 1.182 1.196          |
| Pacific                | 0.269      | 0.003     | -118.98 | 0.000 | 0.263 0.275          |
| Unk/Other              | 1.060      | 0.002     | 37.81   | 0.000 | 1.057 1.064          |
| _cons                  | 0.062      | 0.000     | -933.35 | 0.000 | 0.061 0.062          |

**Appendix 8:** Predictive margins used to create Figures 1 and 2 in main text

| <b>Average daily dose</b> |                |                      |                 |                 |                   |                 |                 |                          |                 |                 |
|---------------------------|----------------|----------------------|-----------------|-----------------|-------------------|-----------------|-----------------|--------------------------|-----------------|-----------------|
|                           |                | <b>Aged Medicare</b> |                 |                 | <b>Commercial</b> |                 |                 | <b>Disabled Medicare</b> |                 |                 |
| <b>Year</b>               | <b>Quarter</b> | <b>MME</b>           | <b>lower CI</b> | <b>upper CI</b> | <b>MME</b>        | <b>lower CI</b> | <b>upper CI</b> | <b>MME</b>               | <b>lower CI</b> | <b>upper CI</b> |
| 2007                      | Q1             | 20.06                | 19.68           | 20.45           | 14.60             | 14.38           | 14.82           | 52.69                    | 51.09           | 54.28           |
|                           | Q2             | 20.12                | 19.73           | 20.50           | 14.92             | 14.70           | 15.14           | 53.54                    | 51.94           | 55.15           |
|                           | Q3             | 20.06                | 19.69           | 20.44           | 14.98             | 14.76           | 15.19           | 52.22                    | 50.73           | 53.71           |
|                           | Q4             | 20.24                | 19.88           | 20.59           | 15.50             | 15.28           | 15.72           | 53.39                    | 51.92           | 54.85           |
| 2008                      | Q1             | 20.73                | 20.37           | 21.08           | 15.17             | 14.96           | 15.38           | 56.26                    | 54.80           | 57.71           |
|                           | Q2             | 21.04                | 20.69           | 21.39           | 15.66             | 15.43           | 15.88           | 58.82                    | 57.36           | 60.27           |
|                           | Q3             | 21.26                | 20.92           | 21.61           | 15.75             | 15.53           | 15.97           | 59.01                    | 57.62           | 60.40           |
|                           | Q4             | 21.83                | 21.48           | 22.19           | 16.40             | 16.17           | 16.63           | 60.73                    | 59.33           | 62.14           |
| 2009                      | Q1             | 21.10                | 20.80           | 21.41           | 16.38             | 16.16           | 16.60           | 60.26                    | 59.06           | 61.46           |
|                           | Q2             | 20.25                | 19.97           | 20.53           | 16.49             | 16.26           | 16.71           | 60.19                    | 59.08           | 61.31           |
|                           | Q3             | 19.85                | 19.58           | 20.11           | 16.74             | 16.51           | 16.96           | 59.69                    | 58.63           | 60.75           |
|                           | Q4             | 19.18                | 18.94           | 19.42           | 17.33             | 17.09           | 17.56           | 59.69                    | 58.66           | 60.73           |
| 2010                      | Q1             | 19.44                | 19.22           | 19.65           | 17.52             | 17.28           | 17.77           | 61.28                    | 60.31           | 62.25           |
|                           | Q2             | 19.47                | 19.26           | 19.68           | 17.65             | 17.41           | 17.90           | 62.25                    | 61.30           | 63.19           |
|                           | Q3             | 19.38                | 19.17           | 19.58           | 17.44             | 17.20           | 17.68           | 61.13                    | 60.23           | 62.03           |
|                           | Q4             | 18.93                | 18.74           | 19.13           | 17.46             | 17.23           | 17.70           | 61.92                    | 61.03           | 62.81           |
| 2011                      | Q1             | 18.52                | 18.32           | 18.72           | 17.05             | 16.81           | 17.28           | 64.37                    | 63.48           | 65.25           |
|                           | Q2             | 18.44                | 18.24           | 18.63           | 17.13             | 16.89           | 17.37           | 65.78                    | 64.89           | 66.67           |
|                           | Q3             | 18.28                | 18.09           | 18.47           | 16.91             | 16.67           | 17.14           | 64.36                    | 63.51           | 65.20           |
|                           | Q4             | 18.33                | 18.14           | 18.52           | 16.99             | 16.75           | 17.22           | 64.11                    | 63.29           | 64.94           |
| 2012                      | Q1             | 19.01                | 18.82           | 19.21           | 16.59             | 16.36           | 16.82           | 65.81                    | 65.00           | 66.62           |
|                           | Q2             | 19.15                | 18.96           | 19.34           | 16.88             | 16.64           | 17.11           | 66.59                    | 65.80           | 67.39           |

### Average daily dose

| Year | Quarter | Aged Medicare |          |          | Commercial |          |          | Disabled Medicare |          |          |
|------|---------|---------------|----------|----------|------------|----------|----------|-------------------|----------|----------|
|      |         | MME           | lower CI | upper CI | MME        | lower CI | upper CI | MME               | lower CI | upper CI |
|      | Q3      | 18.83         | 18.64    | 19.01    | 16.75      | 16.51    | 16.98    | 64.87             | 64.11    | 65.64    |
|      | Q4      | 18.88         | 18.70    | 19.06    | 16.90      | 16.66    | 17.13    | 65.09             | 64.34    | 65.84    |
| 2013 | Q1      | 19.38         | 19.20    | 19.56    | 17.06      | 16.82    | 17.30    | 65.66             | 64.92    | 66.40    |
|      | Q2      | 18.86         | 18.69    | 19.03    | 16.95      | 16.71    | 17.19    | 63.75             | 63.04    | 64.45    |
|      | Q3      | 18.59         | 18.42    | 18.76    | 16.88      | 16.64    | 17.12    | 61.61             | 60.94    | 62.28    |
|      | Q4      | 18.65         | 18.49    | 18.82    | 17.01      | 16.77    | 17.25    | 61.39             | 60.73    | 62.05    |
| 2014 | Q1      | 19.96         | 19.78    | 20.14    | 17.24      | 16.98    | 17.49    | 63.06             | 62.35    | 63.78    |
|      | Q2      | 19.56         | 19.39    | 19.74    | 17.31      | 17.05    | 17.57    | 63.01             | 62.30    | 63.72    |
|      | Q3      | 19.29         | 19.12    | 19.47    | 16.99      | 16.74    | 17.25    | 61.74             | 61.05    | 62.43    |
|      | Q4      | 19.49         | 19.31    | 19.67    | 16.89      | 16.63    | 17.15    | 62.33             | 61.63    | 63.02    |
| 2015 | Q1      | 20.14         | 19.95    | 20.33    | 17.06      | 16.80    | 17.32    | 63.54             | 62.82    | 64.27    |
|      | Q2      | 19.78         | 19.60    | 19.96    | 17.18      | 16.92    | 17.44    | 62.54             | 61.83    | 63.25    |
|      | Q3      | 19.49         | 19.31    | 19.67    | 16.77      | 16.52    | 17.02    | 60.88             | 60.19    | 61.57    |
|      | Q4      | 19.70         | 19.52    | 19.88    | 16.93      | 16.68    | 17.18    | 61.46             | 60.76    | 62.15    |
| 2016 | Q1      | 20.20         | 20.02    | 20.38    | 16.69      | 16.45    | 16.94    | 56.37             | 55.79    | 56.95    |
|      | Q2      | 20.72         | 20.54    | 20.90    | 17.20      | 16.95    | 17.45    | 57.71             | 57.12    | 58.30    |
|      | Q3      | 20.27         | 20.09    | 20.45    | 16.80      | 16.56    | 17.05    | 55.95             | 55.38    | 56.53    |
|      | Q4      | 20.21         | 20.04    | 20.39    | 16.71      | 16.47    | 16.96    | 55.89             | 55.32    | 56.46    |

## Opioid Use Prevalence

| Year | Quarter | Aged Medicare                       |          |          | Commercial                          |          |          | Disabled Medicare                   |          |          |
|------|---------|-------------------------------------|----------|----------|-------------------------------------|----------|----------|-------------------------------------|----------|----------|
|      |         | Proportion using opioids in quarter | lower CI | upper CI | Proportion using opioids in quarter | lower CI | upper CI | Proportion using opioids in quarter | lower CI | upper CI |
| 2007 | Q1      | 0.11                                | 0.11     | 0.11     | 0.06                                | 0.06     | 0.06     | 0.26                                | 0.26     | 0.26     |
|      | Q2      | 0.12                                | 0.12     | 0.12     | 0.06                                | 0.06     | 0.06     | 0.27                                | 0.27     | 0.27     |
|      | Q3      | 0.12                                | 0.12     | 0.12     | 0.07                                | 0.07     | 0.07     | 0.27                                | 0.27     | 0.27     |
|      | Q4      | 0.13                                | 0.13     | 0.13     | 0.07                                | 0.07     | 0.07     | 0.29                                | 0.29     | 0.29     |
| 2008 | Q1      | 0.12                                | 0.12     | 0.12     | 0.07                                | 0.07     | 0.07     | 0.29                                | 0.29     | 0.29     |
|      | Q2      | 0.12                                | 0.12     | 0.12     | 0.07                                | 0.07     | 0.07     | 0.29                                | 0.29     | 0.29     |
|      | Q3      | 0.13                                | 0.13     | 0.13     | 0.07                                | 0.07     | 0.07     | 0.30                                | 0.30     | 0.30     |
|      | Q4      | 0.13                                | 0.13     | 0.13     | 0.07                                | 0.07     | 0.07     | 0.31                                | 0.31     | 0.31     |
| 2009 | Q1      | 0.12                                | 0.12     | 0.12     | 0.07                                | 0.07     | 0.07     | 0.33                                | 0.33     | 0.33     |
|      | Q2      | 0.13                                | 0.13     | 0.13     | 0.07                                | 0.07     | 0.07     | 0.34                                | 0.34     | 0.34     |
|      | Q3      | 0.13                                | 0.13     | 0.13     | 0.07                                | 0.07     | 0.07     | 0.35                                | 0.35     | 0.35     |
|      | Q4      | 0.13                                | 0.13     | 0.13     | 0.07                                | 0.07     | 0.07     | 0.35                                | 0.35     | 0.35     |
| 2010 | Q1      | 0.14                                | 0.14     | 0.14     | 0.07                                | 0.07     | 0.07     | 0.36                                | 0.36     | 0.36     |
|      | Q2      | 0.14                                | 0.14     | 0.14     | 0.07                                | 0.07     | 0.07     | 0.36                                | 0.36     | 0.36     |
|      | Q3      | 0.14                                | 0.14     | 0.14     | 0.07                                | 0.07     | 0.07     | 0.37                                | 0.37     | 0.37     |
|      | Q4      | 0.15                                | 0.15     | 0.15     | 0.07                                | 0.07     | 0.07     | 0.37                                | 0.37     | 0.37     |
| 2011 | Q1      | 0.15                                | 0.15     | 0.15     | 0.07                                | 0.07     | 0.07     | 0.39                                | 0.39     | 0.39     |
|      | Q2      | 0.15                                | 0.15     | 0.15     | 0.07                                | 0.07     | 0.07     | 0.39                                | 0.39     | 0.39     |
|      | Q3      | 0.15                                | 0.15     | 0.15     | 0.07                                | 0.07     | 0.07     | 0.39                                | 0.39     | 0.39     |
|      | Q4      | 0.15                                | 0.15     | 0.15     | 0.07                                | 0.07     | 0.07     | 0.39                                | 0.39     | 0.39     |
| 2012 | Q1      | 0.15                                | 0.15     | 0.15     | 0.07                                | 0.07     | 0.07     | 0.40                                | 0.40     | 0.40     |
|      | Q2      | 0.15                                | 0.15     | 0.15     | 0.07                                | 0.07     | 0.07     | 0.41                                | 0.41     | 0.41     |

## Opioid Use Prevalence

| Year | Quarter | Aged Medicare                       |          |          | Commercial                          |          |          | Disabled Medicare                   |          |          |
|------|---------|-------------------------------------|----------|----------|-------------------------------------|----------|----------|-------------------------------------|----------|----------|
|      |         | Proportion using opioids in quarter | lower CI | upper CI | Proportion using opioids in quarter | lower CI | upper CI | Proportion using opioids in quarter | lower CI | upper CI |
| 2013 | Q3      | 0.15                                | 0.15     | 0.15     | 0.07                                | 0.07     | 0.07     | 0.41                                | 0.41     | 0.41     |
|      | Q4      | 0.15                                | 0.15     | 0.15     | 0.07                                | 0.07     | 0.07     | 0.41                                | 0.41     | 0.41     |
|      | Q1      | 0.15                                | 0.15     | 0.15     | 0.07                                | 0.07     | 0.07     | 0.41                                | 0.41     | 0.41     |
|      | Q2      | 0.15                                | 0.15     | 0.15     | 0.07                                | 0.07     | 0.07     | 0.41                                | 0.41     | 0.41     |
| 2014 | Q3      | 0.15                                | 0.15     | 0.15     | 0.07                                | 0.07     | 0.07     | 0.41                                | 0.41     | 0.41     |
|      | Q4      | 0.15                                | 0.15     | 0.15     | 0.07                                | 0.07     | 0.07     | 0.41                                | 0.41     | 0.41     |
|      | Q1      | 0.14                                | 0.14     | 0.14     | 0.06                                | 0.06     | 0.07     | 0.40                                | 0.40     | 0.40     |
|      | Q2      | 0.15                                | 0.15     | 0.15     | 0.07                                | 0.07     | 0.07     | 0.41                                | 0.41     | 0.41     |
| 2015 | Q3      | 0.15                                | 0.15     | 0.15     | 0.06                                | 0.06     | 0.06     | 0.41                                | 0.40     | 0.41     |
|      | Q4      | 0.15                                | 0.15     | 0.15     | 0.06                                | 0.06     | 0.06     | 0.40                                | 0.40     | 0.40     |
|      | Q1      | 0.14                                | 0.14     | 0.14     | 0.06                                | 0.06     | 0.06     | 0.40                                | 0.40     | 0.40     |
|      | Q2      | 0.14                                | 0.14     | 0.14     | 0.06                                | 0.06     | 0.06     | 0.41                                | 0.41     | 0.41     |
| 2016 | Q3      | 0.14                                | 0.14     | 0.14     | 0.06                                | 0.06     | 0.06     | 0.41                                | 0.41     | 0.41     |
|      | Q4      | 0.14                                | 0.14     | 0.14     | 0.06                                | 0.06     | 0.06     | 0.41                                | 0.41     | 0.41     |
|      | Q1      | 0.15                                | 0.15     | 0.15     | 0.06                                | 0.06     | 0.06     | 0.40                                | 0.40     | 0.40     |
|      | Q2      | 0.15                                | 0.15     | 0.15     | 0.06                                | 0.06     | 0.06     | 0.40                                | 0.40     | 0.40     |
| 2016 | Q3      | 0.15                                | 0.15     | 0.15     | 0.06                                | 0.06     | 0.06     | 0.39                                | 0.39     | 0.39     |
|      | Q4      | 0.14                                | 0.14     | 0.14     | 0.06                                | 0.06     | 0.06     | 0.39                                | 0.38     | 0.39     |

### Average daily dose by age (MME)

|                  |    | Commercial |       |       |       |       |       | Aged Medicare |       | Disabled Medicare |       |       |       |       |
|------------------|----|------------|-------|-------|-------|-------|-------|---------------|-------|-------------------|-------|-------|-------|-------|
| Year/<br>Quarter |    | 0-18       | 19-34 | 35-44 | 45-54 | 55-64 | 65-74 | 75+           | 65-74 | 75+               | 19-34 | 35-44 | 45-54 | 55-64 |
| 2007             | Q1 | 3.48       | 8.78  | 15.40 | 20.74 | 18.95 | 17.77 | 19.00         | 20.68 | 18.98             | 59.51 | 68.84 | 65.17 | 45.60 |
|                  | Q2 | 3.55       | 9.20  | 16.03 | 21.25 | 19.22 | 18.37 | 18.96         | 20.91 | 19.36             | 59.12 | 72.29 | 67.03 | 46.39 |
|                  | Q3 | 3.39       | 9.52  | 16.45 | 21.47 | 19.33 | 18.49 | 19.67         | 21.30 | 19.48             | 56.61 | 72.05 | 66.71 | 45.57 |
|                  | Q4 | 3.60       | 10.27 | 17.01 | 21.79 | 19.34 | 19.09 | 19.27         | 21.88 | 20.27             | 60.83 | 70.94 | 70.05 | 45.88 |
| 2008             | Q1 | 3.57       | 9.56  | 16.02 | 21.30 | 19.11 | 18.55 | 19.17         | 22.35 | 19.43             | 56.91 | 73.96 | 71.59 | 48.85 |
|                  | Q2 | 3.63       | 10.13 | 16.56 | 21.94 | 19.47 | 18.47 | 18.71         | 23.02 | 19.58             | 59.95 | 77.77 | 74.35 | 50.55 |
|                  | Q3 | 3.40       | 10.49 | 16.95 | 22.21 | 19.65 | 18.44 | 19.16         | 23.63 | 20.16             | 61.64 | 78.43 | 75.47 | 52.26 |
|                  | Q4 | 3.51       | 11.42 | 17.51 | 22.60 | 19.95 | 18.39 | 17.68         | 24.36 | 20.71             | 60.38 | 79.71 | 78.01 | 53.22 |
| 2009             | Q1 | 3.29       | 10.69 | 16.82 | 22.30 | 20.31 | 18.25 | 18.18         | 22.94 | 19.55             | 56.33 | 75.52 | 76.89 | 52.38 |
|                  | Q2 | 3.17       | 11.14 | 17.20 | 22.69 | 20.27 | 18.42 | 18.12         | 22.37 | 18.76             | 58.67 | 74.80 | 78.46 | 52.21 |
|                  | Q3 | 2.98       | 11.70 | 17.90 | 23.02 | 20.67 | 18.53 | 18.05         | 22.24 | 18.56             | 59.03 | 76.04 | 78.55 | 51.97 |
|                  | Q4 | 3.18       | 12.60 | 18.36 | 23.09 | 20.74 | 18.63 | 16.86         | 21.68 | 17.85             | 61.04 | 78.40 | 78.08 | 51.22 |
| 2010             | Q1 | 3.11       | 12.04 | 18.10 | 22.89 | 21.15 | 17.83 | 15.96         | 21.78 | 17.81             | 61.45 | 76.86 | 77.62 | 53.18 |
|                  | Q2 | 3.14       | 12.48 | 18.58 | 23.30 | 21.19 | 17.52 | 17.51         | 22.31 | 18.13             | 63.64 | 79.23 | 79.25 | 54.78 |
|                  | Q3 | 3.03       | 12.60 | 18.81 | 23.18 | 21.08 | 17.36 | 16.64         | 22.40 | 18.28             | 62.17 | 78.31 | 78.94 | 54.35 |
|                  | Q4 | 3.21       | 12.90 | 18.74 | 22.59 | 20.28 | 16.94 | 15.79         | 21.56 | 17.51             | 64.13 | 79.00 | 79.96 | 54.27 |
| 2011             | Q1 | 3.06       | 11.59 | 17.83 | 21.50 | 19.78 | 15.76 | 14.81         | 20.38 | 15.34             | 57.72 | 78.40 | 80.14 | 55.99 |
|                  | Q2 | 3.00       | 11.90 | 18.10 | 21.68 | 19.83 | 15.76 | 14.45         | 20.65 | 15.37             | 61.86 | 82.50 | 82.85 | 57.58 |
|                  | Q3 | 2.85       | 11.87 | 18.20 | 21.65 | 19.71 | 15.82 | 14.11         | 20.69 | 15.45             | 59.66 | 80.41 | 81.52 | 57.01 |
|                  | Q4 | 3.07       | 12.44 | 18.17 | 21.62 | 19.49 | 16.09 | 14.12         | 20.62 | 15.61             | 61.40 | 80.96 | 81.25 | 56.44 |
| 2012             | Q1 | 2.95       | 11.27 | 17.56 | 21.07 | 20.02 | 15.95 | 14.58         | 21.68 | 15.53             | 60.92 | 80.27 | 81.66 | 58.54 |
|                  | Q2 | 3.00       | 11.60 | 17.93 | 21.52 | 20.21 | 16.26 | 14.42         | 21.92 | 15.58             | 61.17 | 79.88 | 82.54 | 59.42 |

### Average daily dose by age (MME)

| Year/<br>Quarter | Commercial |       |       |       |       |       |       | Aged<br>Medicare |       | Disabled Medicare |       |       |       |
|------------------|------------|-------|-------|-------|-------|-------|-------|------------------|-------|-------------------|-------|-------|-------|
|                  | 0-18       | 19-34 | 35-44 | 45-54 | 55-64 | 65-74 | 75+   | 65-74            | 75+   | 19-34             | 35-44 | 45-54 | 55-64 |
| 2013 Q3          | 2.89       | 11.64 | 18.11 | 21.50 | 20.13 | 16.44 | 13.96 | 21.70            | 15.59 | 62.75             | 79.08 | 80.75 | 58.45 |
| 2013 Q4          | 3.01       | 12.18 | 17.95 | 21.49 | 19.76 | 16.19 | 13.24 | 21.64            | 15.71 | 63.50             | 79.77 | 81.29 | 58.48 |
| 2013 Q1          | 3.04       | 11.41 | 17.84 | 21.36 | 20.48 | 16.43 | 13.96 | 22.09            | 15.55 | 59.62             | 77.99 | 79.24 | 59.30 |
| 2013 Q2          | 2.99       | 11.68 | 18.12 | 21.46 | 20.17 | 16.48 | 13.77 | 21.71            | 15.38 | 59.17             | 76.80 | 77.71 | 58.32 |
| 2013 Q3          | 3.14       | 11.75 | 18.39 | 21.31 | 20.08 | 16.44 | 13.91 | 21.47            | 15.50 | 57.35             | 75.16 | 76.03 | 57.02 |
| 2013 Q4          | 3.65       | 12.17 | 18.23 | 21.17 | 19.73 | 15.73 | 13.95 | 21.43            | 15.61 | 58.95             | 75.47 | 76.00 | 56.59 |
| 2014 Q1          | 3.92       | 11.22 | 18.21 | 21.18 | 20.77 | 17.22 | 13.67 | 22.99            | 16.11 | 53.98             | 73.88 | 74.65 | 58.50 |
| 2014 Q2          | 4.07       | 11.35 | 18.48 | 21.20 | 21.05 | 17.48 | 14.26 | 22.75            | 15.95 | 54.27             | 74.58 | 75.33 | 59.21 |
| 2014 Q3          | 3.76       | 10.75 | 18.19 | 21.22 | 20.93 | 17.50 | 14.23 | 22.56            | 16.01 | 54.88             | 73.91 | 74.13 | 58.67 |
| 2014 Q4          | 3.77       | 11.03 | 18.28 | 20.98 | 20.52 | 17.72 | 14.51 | 22.73            | 16.22 | 57.62             | 75.58 | 74.68 | 58.88 |
| 2015 Q1          | 3.81       | 10.14 | 17.85 | 20.85 | 21.17 | 17.73 | 15.41 | 23.30            | 16.13 | 56.06             | 73.50 | 73.71 | 59.44 |
| 2015 Q2          | 3.87       | 10.35 | 18.30 | 21.30 | 21.37 | 18.10 | 15.33 | 23.12            | 16.06 | 55.57             | 72.63 | 73.54 | 58.94 |
| 2015 Q3          | 3.58       | 10.35 | 18.26 | 21.20 | 21.03 | 17.64 | 15.57 | 22.94            | 16.04 | 54.99             | 71.60 | 72.15 | 58.26 |
| 2015 Q4          | 3.86       | 10.84 | 18.28 | 21.07 | 20.86 | 17.59 | 15.71 | 23.11            | 16.24 | 56.20             | 71.94 | 72.87 | 58.82 |
| 2016 Q1          | 3.79       | 9.82  | 17.77 | 21.01 | 21.13 | 18.02 | 14.14 | 24.12            | 16.27 | 46.70             | 64.11 | 65.66 | 55.58 |
| 2016 Q2          | 3.78       | 10.35 | 18.64 | 21.90 | 21.63 | 18.38 | 14.03 | 24.82            | 16.57 | 45.44             | 65.07 | 67.26 | 56.93 |
| 2016 Q3          | 3.51       | 10.42 | 18.53 | 21.65 | 21.26 | 18.26 | 14.30 | 24.49            | 16.50 | 44.71             | 63.78 | 65.85 | 55.89 |
| 2016 Q4          | 3.73       | 10.74 | 18.40 | 21.08 | 20.71 | 17.60 | 13.61 | 24.30            | 16.53 | 45.43             | 64.63 | 65.81 | 55.76 |



## Opioid use prevalence by age (proportion using in quarter)

|                  |    | Commercial |       |       |       |       |       | Aged Medicare |       | Disabled Medicare |       |       |       |       |
|------------------|----|------------|-------|-------|-------|-------|-------|---------------|-------|-------------------|-------|-------|-------|-------|
| Year/<br>Quarter |    | 0-18       | 19-34 | 35-44 | 45-54 | 55-64 | 65-74 | 75+           | 65-74 | 75+               | 19-34 | 35-44 | 45-54 | 55-64 |
| 2007             | Q1 | 0.01       | 0.07  | 0.08  | 0.10  | 0.10  | 0.11  | 0.11          | 0.11  | 0.12              | 0.19  | 0.26  | 0.31  | 0.26  |
|                  | Q2 | 0.01       | 0.07  | 0.08  | 0.10  | 0.10  | 0.11  | 0.11          | 0.11  | 0.13              | 0.19  | 0.27  | 0.31  | 0.27  |
|                  | Q3 | 0.02       | 0.07  | 0.08  | 0.10  | 0.10  | 0.11  | 0.11          | 0.12  | 0.13              | 0.21  | 0.28  | 0.32  | 0.28  |
|                  | Q4 | 0.01       | 0.07  | 0.08  | 0.10  | 0.11  | 0.11  | 0.11          | 0.13  | 0.14              | 0.21  | 0.30  | 0.33  | 0.29  |
| 2008             | Q1 | 0.01       | 0.07  | 0.09  | 0.10  | 0.11  | 0.11  | 0.11          | 0.12  | 0.13              | 0.23  | 0.29  | 0.33  | 0.29  |
|                  | Q2 | 0.01       | 0.07  | 0.09  | 0.10  | 0.11  | 0.12  | 0.12          | 0.13  | 0.13              | 0.23  | 0.29  | 0.34  | 0.30  |
|                  | Q3 | 0.02       | 0.07  | 0.09  | 0.10  | 0.11  | 0.12  | 0.12          | 0.13  | 0.14              | 0.23  | 0.31  | 0.35  | 0.31  |
|                  | Q4 | 0.01       | 0.07  | 0.09  | 0.10  | 0.11  | 0.12  | 0.12          | 0.13  | 0.14              | 0.24  | 0.32  | 0.35  | 0.31  |
| 2009             | Q1 | 0.01       | 0.07  | 0.09  | 0.10  | 0.11  | 0.12  | 0.12          | 0.13  | 0.13              | 0.24  | 0.32  | 0.37  | 0.33  |
|                  | Q2 | 0.01       | 0.07  | 0.09  | 0.10  | 0.11  | 0.12  | 0.12          | 0.13  | 0.14              | 0.25  | 0.34  | 0.39  | 0.34  |
|                  | Q3 | 0.02       | 0.07  | 0.09  | 0.10  | 0.11  | 0.12  | 0.12          | 0.14  | 0.14              | 0.25  | 0.35  | 0.40  | 0.35  |
|                  | Q4 | 0.02       | 0.07  | 0.09  | 0.11  | 0.12  | 0.12  | 0.12          | 0.14  | 0.14              | 0.25  | 0.36  | 0.40  | 0.35  |
| 2010             | Q1 | 0.01       | 0.07  | 0.09  | 0.10  | 0.11  | 0.12  | 0.12          | 0.14  | 0.14              | 0.25  | 0.35  | 0.40  | 0.36  |
|                  | Q2 | 0.01       | 0.07  | 0.09  | 0.10  | 0.12  | 0.12  | 0.13          | 0.15  | 0.15              | 0.25  | 0.36  | 0.41  | 0.37  |
|                  | Q3 | 0.02       | 0.07  | 0.09  | 0.10  | 0.12  | 0.12  | 0.13          | 0.15  | 0.15              | 0.27  | 0.37  | 0.42  | 0.37  |
|                  | Q4 | 0.02       | 0.07  | 0.09  | 0.11  | 0.12  | 0.12  | 0.13          | 0.15  | 0.15              | 0.26  | 0.37  | 0.42  | 0.37  |
| 2011             | Q1 | 0.01       | 0.07  | 0.09  | 0.10  | 0.12  | 0.12  | 0.13          | 0.15  | 0.15              | 0.26  | 0.38  | 0.44  | 0.39  |
|                  | Q2 | 0.01       | 0.07  | 0.09  | 0.10  | 0.12  | 0.12  | 0.13          | 0.15  | 0.15              | 0.26  | 0.38  | 0.44  | 0.39  |
|                  | Q3 | 0.02       | 0.07  | 0.09  | 0.10  | 0.12  | 0.12  | 0.13          | 0.15  | 0.15              | 0.27  | 0.38  | 0.44  | 0.39  |
|                  | Q4 | 0.02       | 0.07  | 0.09  | 0.10  | 0.12  | 0.13  | 0.13          | 0.15  | 0.15              | 0.27  | 0.39  | 0.45  | 0.39  |
| 2012             | Q1 | 0.01       | 0.07  | 0.09  | 0.10  | 0.12  | 0.12  | 0.13          | 0.15  | 0.15              | 0.27  | 0.39  | 0.45  | 0.40  |
|                  | Q2 | 0.01       | 0.07  | 0.09  | 0.10  | 0.12  | 0.12  | 0.13          | 0.15  | 0.15              | 0.27  | 0.39  | 0.45  | 0.41  |
|                  | Q3 | 0.02       | 0.07  | 0.08  | 0.10  | 0.12  | 0.12  | 0.12          | 0.15  | 0.15              | 0.26  | 0.39  | 0.45  | 0.40  |

### Opioid use prevalence by age (proportion using in quarter)

| Year/<br>Quarter | Commercial |       |       |       |       |       |      | Aged<br>Medicare |      | Disabled Medicare |       |       |       |
|------------------|------------|-------|-------|-------|-------|-------|------|------------------|------|-------------------|-------|-------|-------|
|                  | 0-18       | 19-34 | 35-44 | 45-54 | 55-64 | 65-74 | 75+  | 65-74            | 75+  | 19-34             | 35-44 | 45-54 | 55-64 |
| 2013 Q4          | 0.01       | 0.06  | 0.09  | 0.10  | 0.12  | 0.12  | 0.13 | 0.15             | 0.15 | 0.27              | 0.39  | 0.45  | 0.40  |
| 2013 Q1          | 0.01       | 0.06  | 0.08  | 0.10  | 0.11  | 0.12  | 0.12 | 0.15             | 0.15 | 0.25              | 0.38  | 0.45  | 0.41  |
| 2013 Q2          | 0.01       | 0.06  | 0.08  | 0.10  | 0.11  | 0.12  | 0.12 | 0.15             | 0.15 | 0.25              | 0.38  | 0.45  | 0.41  |
| 2013 Q3          | 0.01       | 0.06  | 0.08  | 0.10  | 0.11  | 0.12  | 0.13 | 0.15             | 0.15 | 0.26              | 0.38  | 0.45  | 0.41  |
| 2014 Q4          | 0.01       | 0.06  | 0.08  | 0.10  | 0.12  | 0.12  | 0.12 | 0.15             | 0.15 | 0.26              | 0.38  | 0.45  | 0.41  |
| 2014 Q1          | 0.01       | 0.06  | 0.08  | 0.10  | 0.11  | 0.11  | 0.12 | 0.15             | 0.14 | 0.23              | 0.37  | 0.44  | 0.40  |
| 2014 Q2          | 0.01       | 0.06  | 0.08  | 0.10  | 0.11  | 0.12  | 0.12 | 0.15             | 0.15 | 0.24              | 0.37  | 0.44  | 0.41  |
| 2014 Q3          | 0.01       | 0.06  | 0.08  | 0.09  | 0.11  | 0.12  | 0.12 | 0.15             | 0.15 | 0.24              | 0.37  | 0.44  | 0.40  |
| 2014 Q4          | 0.01       | 0.05  | 0.08  | 0.09  | 0.11  | 0.12  | 0.12 | 0.14             | 0.14 | 0.23              | 0.36  | 0.43  | 0.39  |
| 2015 Q1          | 0.01       | 0.05  | 0.07  | 0.09  | 0.10  | 0.11  | 0.11 | 0.14             | 0.13 | 0.21              | 0.36  | 0.43  | 0.40  |
| 2015 Q2          | 0.01       | 0.05  | 0.08  | 0.09  | 0.11  | 0.11  | 0.12 | 0.14             | 0.14 | 0.22              | 0.36  | 0.43  | 0.40  |
| 2015 Q3          | 0.01       | 0.05  | 0.08  | 0.09  | 0.11  | 0.11  | 0.12 | 0.14             | 0.14 | 0.22              | 0.36  | 0.43  | 0.40  |
| 2015 Q4          | 0.01       | 0.05  | 0.08  | 0.10  | 0.11  | 0.12  | 0.12 | 0.14             | 0.14 | 0.22              | 0.36  | 0.43  | 0.40  |
| 2016 Q1          | 0.01       | 0.05  | 0.07  | 0.09  | 0.11  | 0.11  | 0.11 | 0.15             | 0.14 | 0.21              | 0.35  | 0.42  | 0.40  |
| 2016 Q2          | 0.01       | 0.05  | 0.07  | 0.09  | 0.11  | 0.11  | 0.11 | 0.15             | 0.14 | 0.21              | 0.35  | 0.42  | 0.40  |
| 2016 Q3          | 0.01       | 0.05  | 0.07  | 0.09  | 0.10  | 0.11  | 0.11 | 0.15             | 0.14 | 0.21              | 0.35  | 0.42  | 0.40  |
| 2016 Q4          | 0.01       | 0.05  | 0.07  | 0.09  | 0.11  | 0.11  | 0.11 | 0.14             | 0.14 | 0.20              | 0.33  | 0.41  | 0.39  |

## Appendix 9: Trends in opioids filled

Figure A1: Aged Medicare volume trends by active ingredient: MME per 1000 person-years (unadjusted)

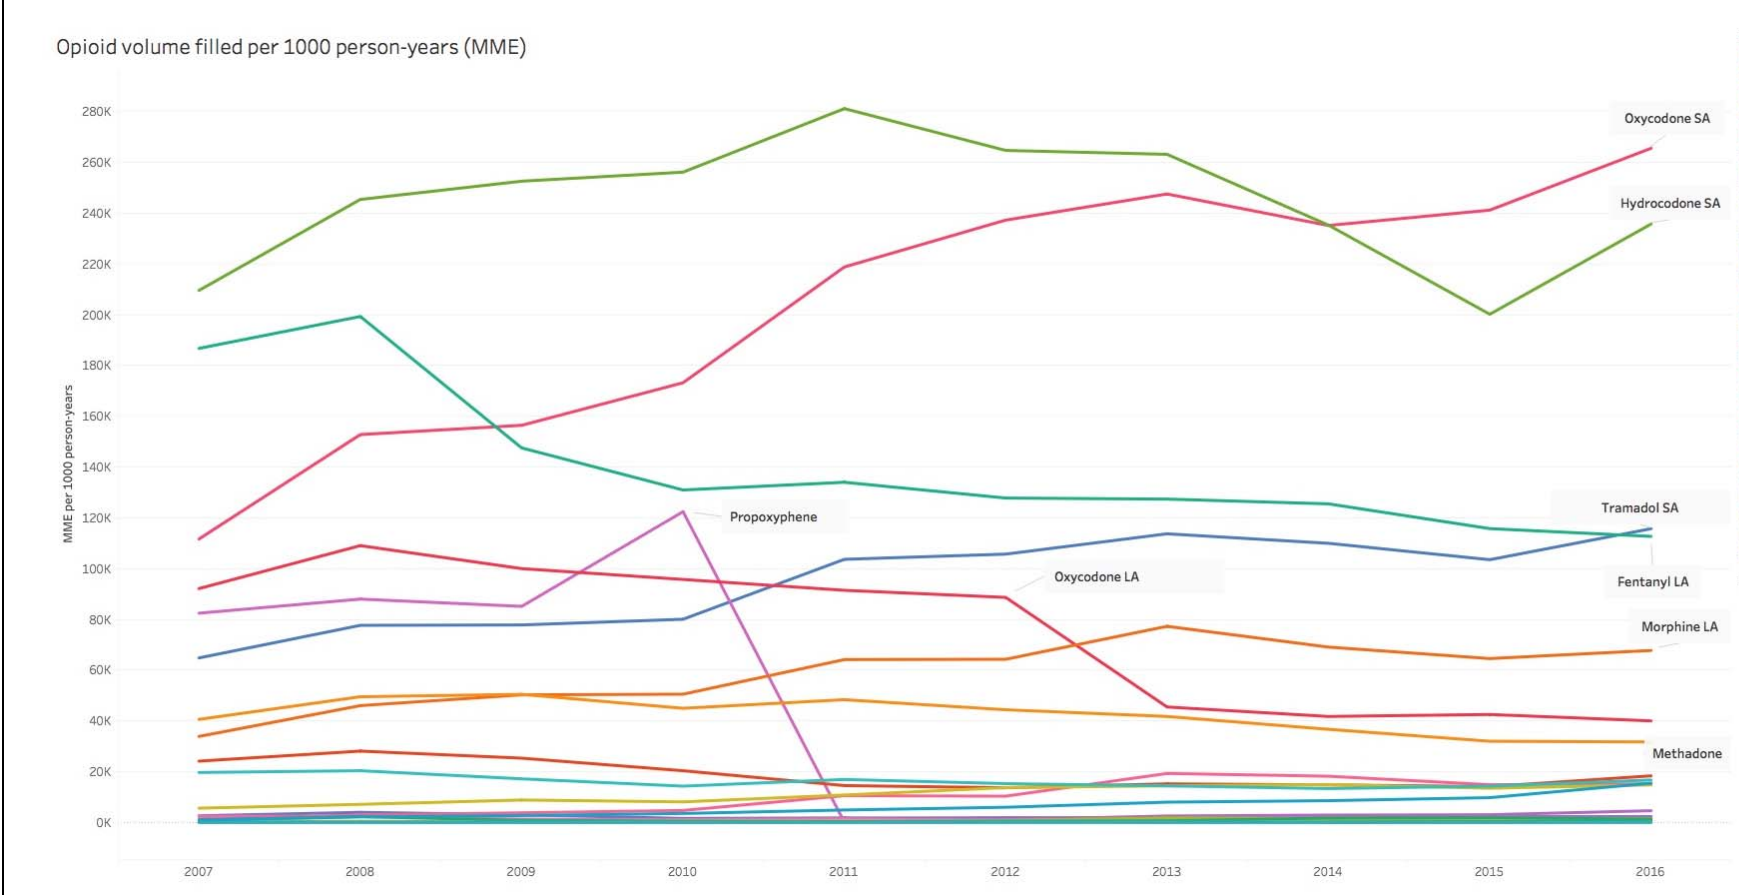

Figure A2: Aged Medicare fill trends by active ingredient: fills per 1000 person-years (unadjusted)

Fills per 1000 person-years

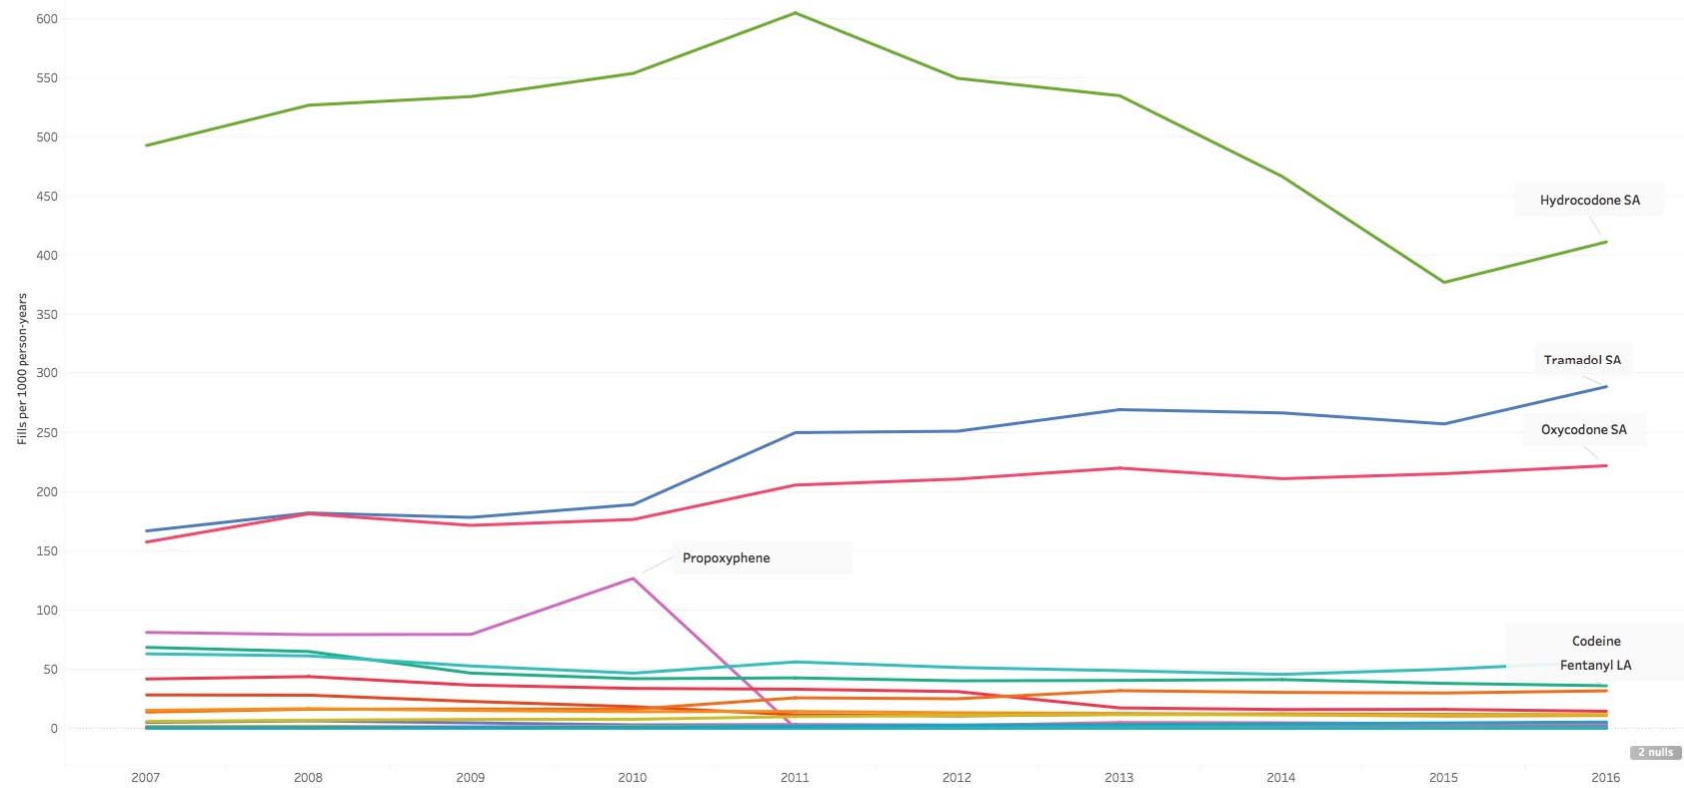

**Figure A3: Commercial volume trends by active ingredient: MME per 1000 person-years (unadjusted)**

Opioid volume filled per 1000 person-years (MME)

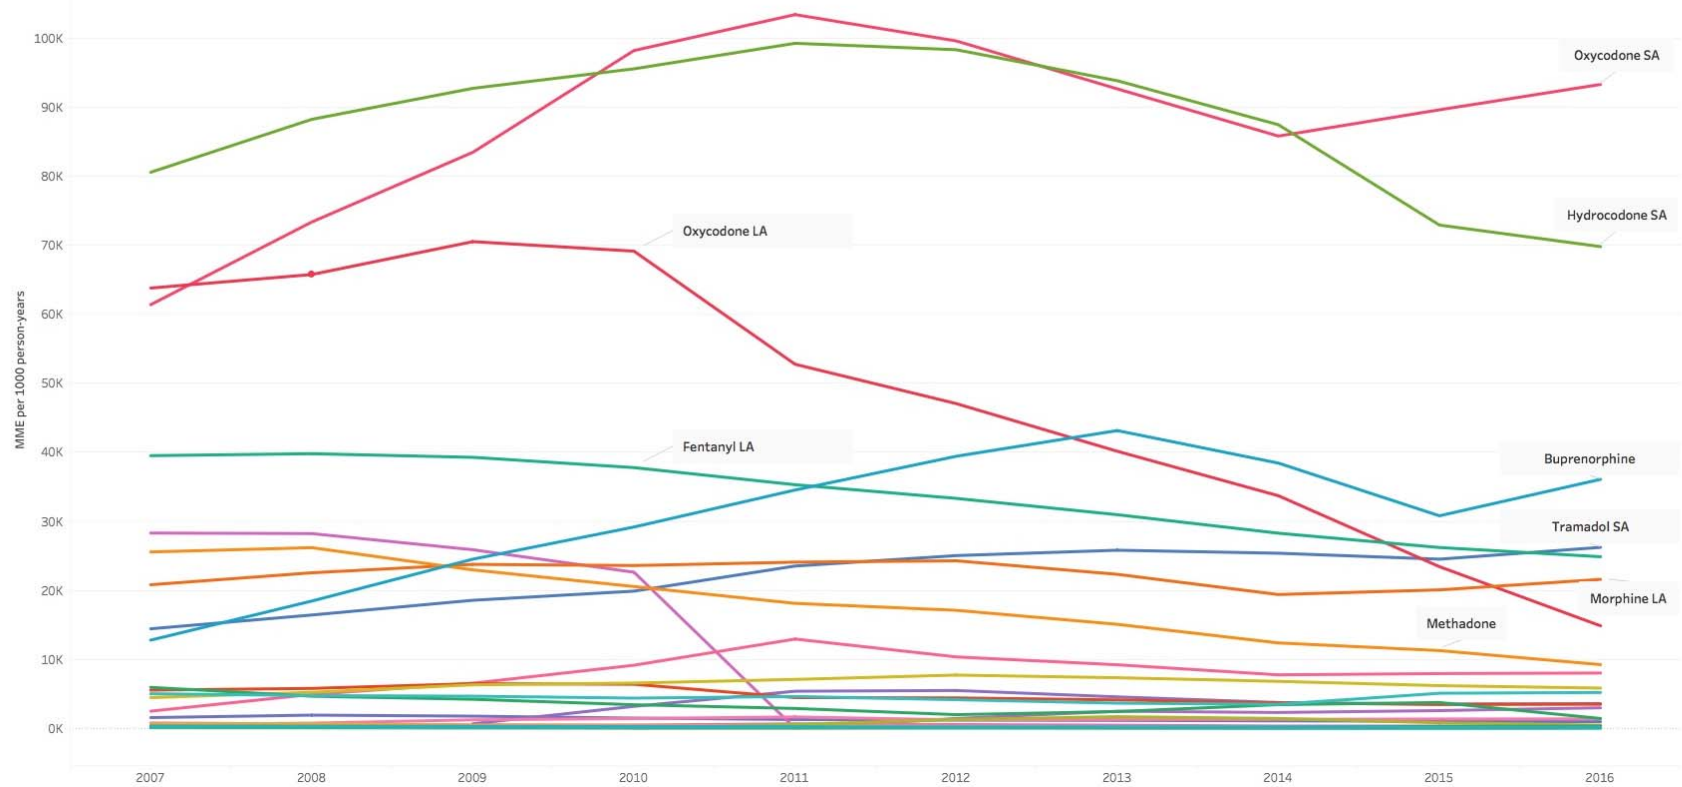

**Figure A4: Commercial fill trends by active ingredient: Fills per 1000 person-years (unadjusted)**

Fills per 1000 person-years

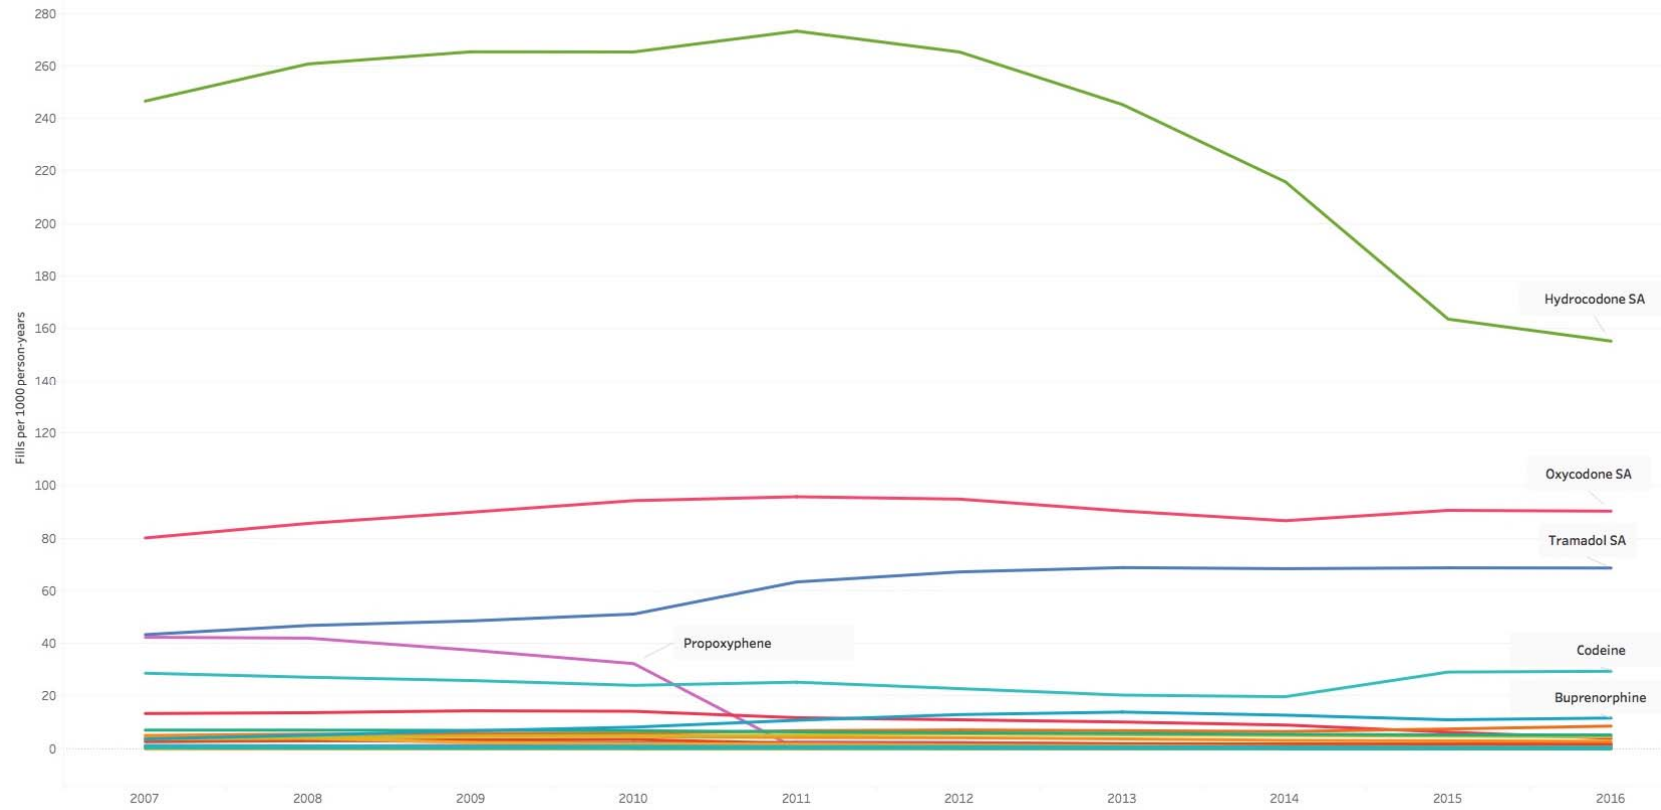

**Figure A5: Disabled Medicare volume trends by active ingredient: MME per 1000 person-years (unadjusted)**

Opioid volume filled per 1000 person-years (MME)

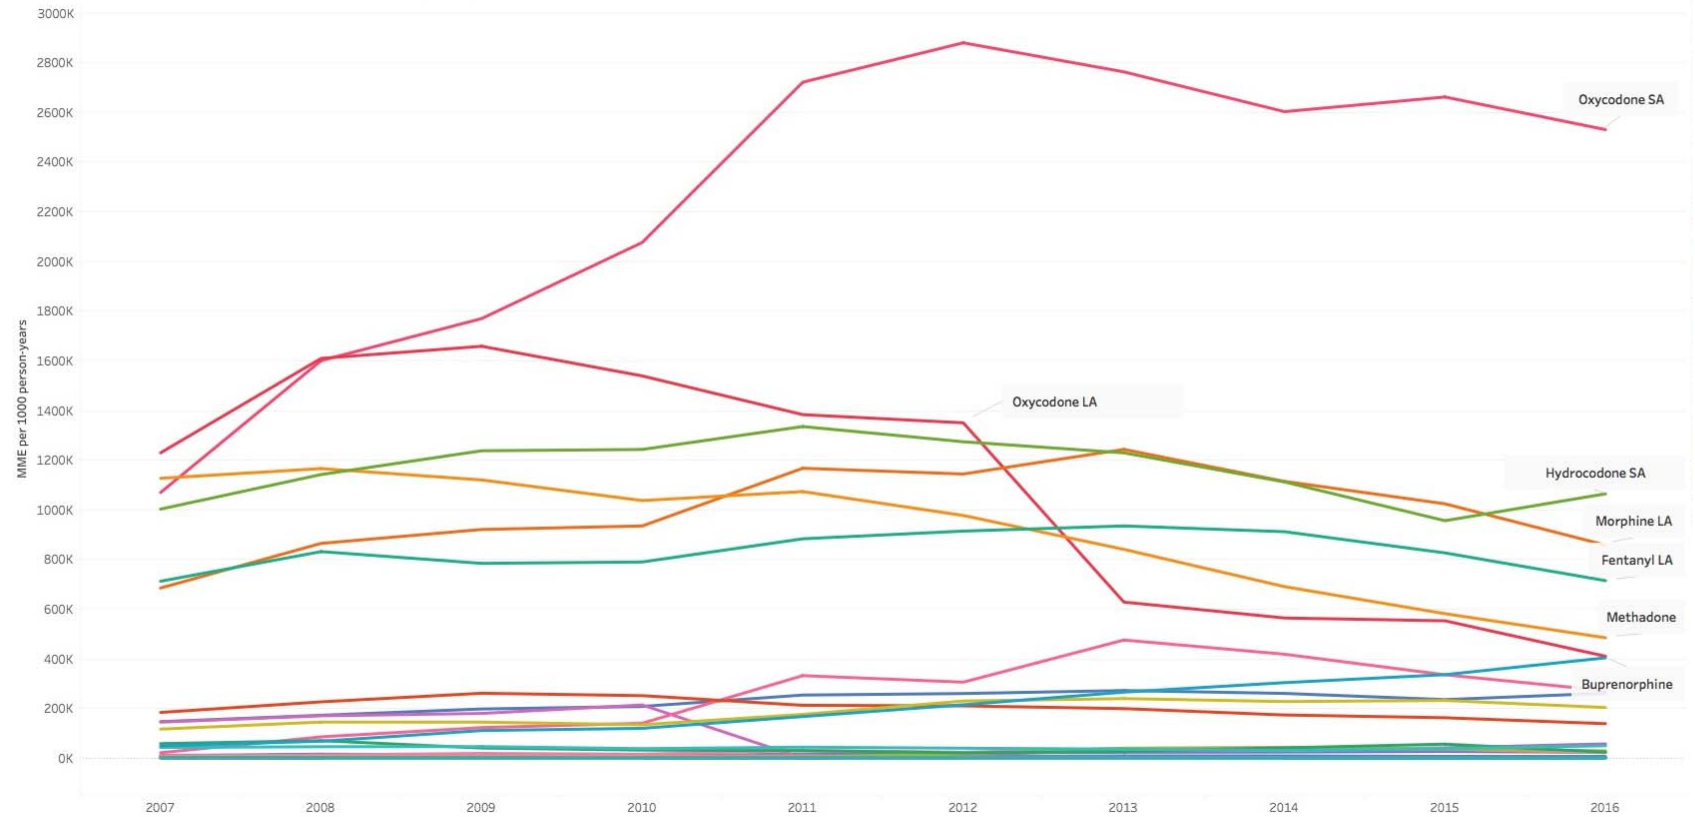

**Figure A6: Disabled Medicare fill trends by active ingredient: Fills per 1000 person-years (unadjusted)**

Fills per 1000 person-years

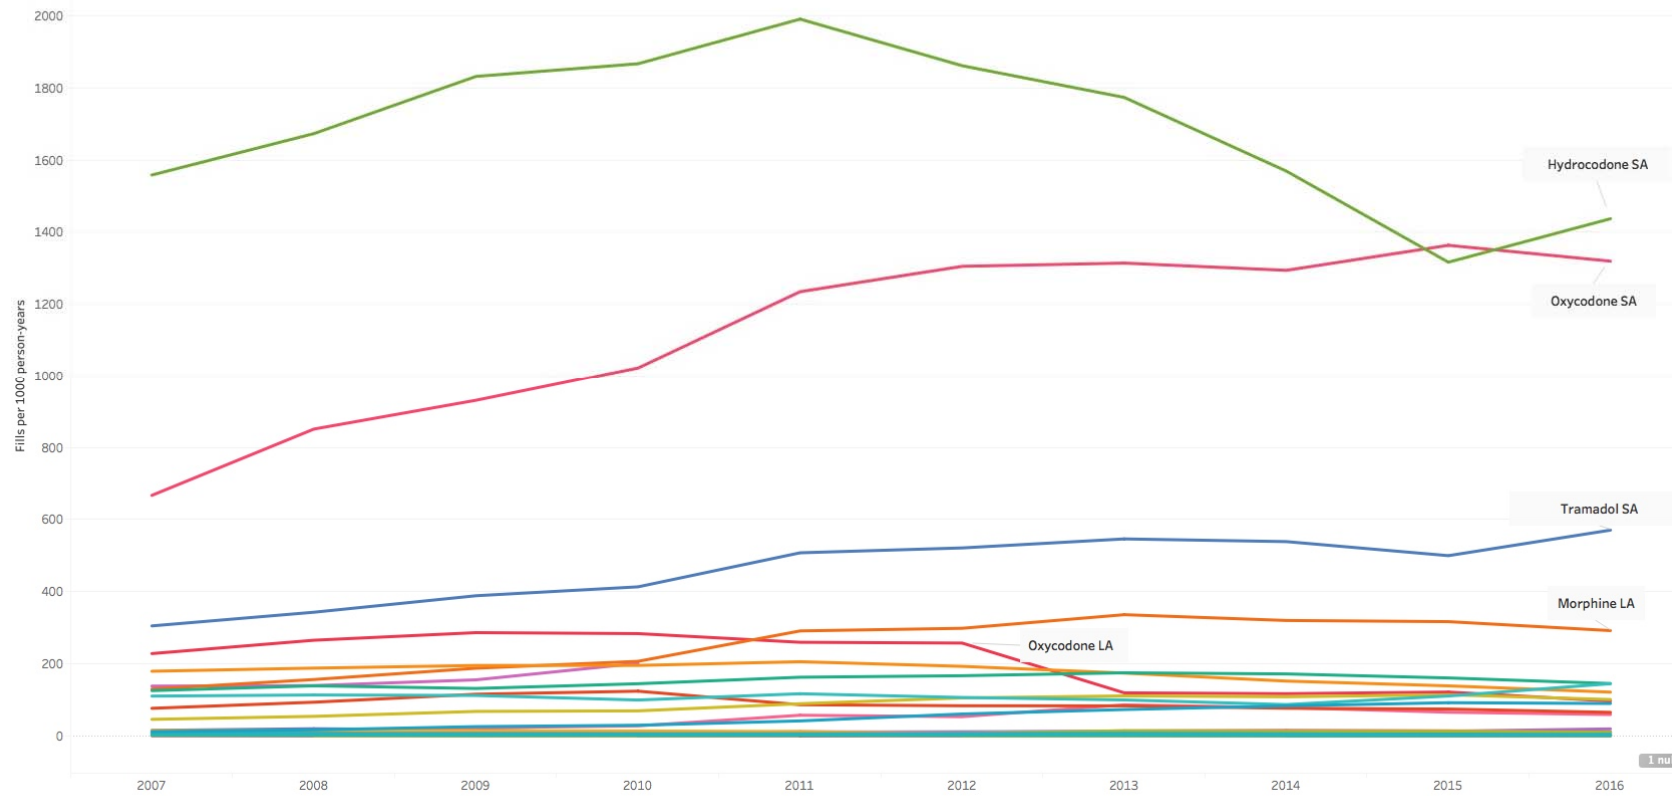



**Table A6: Number of fills and volume of opioids filled by active ingredient and beneficiary population (data for Figures A1 through A6)**

| DRUG           |      | Commercial     |              | Aged Medicare  |              | Disabled Medicare |              |
|----------------|------|----------------|--------------|----------------|--------------|-------------------|--------------|
|                |      | Fills per 1000 | MME per 1000 | Fills per 1000 | MME per 1000 | Fills per 1000    | MME per 1000 |
|                |      | person-years   | person-years | person-years   | person-years | person-years      | person-years |
| Buprenorphine  | 2007 | 4              | 12,784       | 0              | 913          | 12                | 49,886       |
|                | 2008 | 5              | 18,452       | 1              | 2,158        | 17                | 68,213       |
|                | 2009 | 7              | 24,520       | 1              | 2,685        | 26                | 111,308      |
|                | 2010 | 8              | 29,177       | 1              | 3,502        | 29                | 120,234      |
|                | 2011 | 11             | 34,538       | 2              | 4,869        | 42                | 167,640      |
|                | 2012 | 13             | 39,428       | 2              | 5,950        | 61                | 215,081      |
|                | 2013 | 14             | 43,154       | 3              | 7,963        | 73                | 266,016      |
|                | 2014 | 13             | 38,440       | 4              | 8,543        | 83                | 304,108      |
|                | 2015 | 11             | 30,804       | 4              | 9,737        | 92                | 336,349      |
|                | 2016 | 12             | 36,088       | 5              | 15,426       | 90                | 404,104      |
| Butorphanol    | 2007 | 1              | 347          | 0              | 88           | 9                 | 3,021        |
|                | 2008 | 1              | 330          | 0              | 67           | 7                 | 2,745        |
|                | 2009 | 1              | 300          | 0              | 85           | 7                 | 2,688        |
|                | 2010 | 1              | 262          | 0              | 72           | 6                 | 1,885        |
|                | 2011 | 1              | 233          | 0              | 107          | 6                 | 1,759        |
|                | 2012 | 1              | 210          | 0              | 160          | 7                 | 2,304        |
|                | 2013 | 1              | 208          | 0              | 155          | 7                 | 2,841        |
|                | 2014 | 1              | 186          | 0              | 119          | 6                 | 2,517        |
|                | 2015 | 1              | 182          | 0              | 123          | 4                 | 1,420        |
|                | 2016 | 1              | 178          | 0              | 145          | 5                 | 1,294        |
| Codeine        | 2007 | 29             | 5,018        | 63             | 19,656       | 110               | 43,202       |
|                | 2008 | 27             | 4,751        | 61             | 20,345       | 113               | 46,191       |
|                | 2009 | 26             | 4,662        | 52             | 17,151       | 112               | 46,607       |
|                | 2010 | 24             | 4,385        | 46             | 14,271       | 99                | 38,454       |
|                | 2011 | 25             | 4,620        | 56             | 16,903       | 117               | 44,325       |
|                | 2012 | 23             | 4,156        | 51             | 15,261       | 107               | 40,173       |
|                | 2013 | 20             | 3,652        | 49             | 14,384       | 100               | 36,581       |
|                | 2014 | 20             | 3,489        | 45             | 13,302       | 87                | 30,365       |
|                | 2015 | 29             | 5,088        | 50             | 14,269       | 111               | 38,189       |
|                | 2016 | 29             | 5,200        | 56             | 16,684       | 145               | 50,152       |
| Dihydrocodeine | 2007 | 0              | 106          | 0              | 72           | 2                 | 598          |
|                | 2008 | 0              | 90           | 0              | 72           | 1                 | 624          |
|                | 2009 | 0              | 63           | 0              | 37           | 1                 | 254          |
|                | 2010 | 0              | 51           | 0              | 45           | 1                 | 463          |
|                | 2011 | 0              | 57           | 0              | 31           | 1                 | 583          |
|                | 2012 | 0              | 47           | 0              | 41           | 1                 | 437          |
|                | 2013 | 0              | 33           | 0              | 20           | 1                 | 212          |
|                | 2014 | 0              | 3            | 0              | 5            | 0                 | 30           |
|                | 2015 | 0              | 3            | 0              | 4            | 0                 | 42           |
|                | 2016 | 0              | 11           | 0              | 30           | 0                 | 138          |
| Fentanyl LA    | 2007 | 7              | 39,517       | 68             | 186,756      | 126               | 712,603      |
|                | 2008 | 7              | 39,802       | 65             | 199,327      | 139               | 831,872      |
|                | 2009 | 7              | 39,279       | 46             | 147,537      | 132               | 784,515      |

| DRUG                |      | Commercial        |              | Aged Medicare     |              | Disabled Medicare |              |
|---------------------|------|-------------------|--------------|-------------------|--------------|-------------------|--------------|
|                     |      | Fills per<br>1000 | MME per 1000 | Fills per<br>1000 | MME per 1000 | Fills per 1000    | MME per 1000 |
|                     |      | person-<br>years  | person-years | person-<br>years  | person-years | person-years      | person-years |
| Fentanyl SA         | 2010 | 7                 | 37,786       | 42                | 130,966      | 145               | 790,173      |
|                     | 2011 | 6                 | 35,307       | 42                | 134,001      | 163               | 883,420      |
|                     | 2012 | 6                 | 33,327       | 40                | 127,787      | 167               | 914,448      |
|                     | 2013 | 6                 | 30,964       | 40                | 127,379      | 175               | 935,264      |
|                     | 2014 | 5                 | 28,281       | 41                | 125,495      | 172               | 912,060      |
|                     | 2015 | 5                 | 26,208       | 38                | 115,745      | 161               | 826,646      |
|                     | 2016 | 5                 | 24,875       | 36                | 112,684      | 145               | 714,974      |
|                     | 2007 | 1                 | 5,940        | 0                 | 897          | 7                 | 58,634       |
|                     | 2008 | 0                 | 4,657        | 0                 | 2,264        | 6                 | 70,574       |
|                     | 2009 | 0                 | 4,220        | 0                 | 778          | 3                 | 40,889       |
|                     | 2010 | 0                 | 3,425        | 0                 | 412          | 3                 | 32,714       |
|                     | 2011 | 0                 | 2,886        | 0                 | 305          | 2                 | 30,417       |
|                     | 2012 | 0                 | 1,988        | 0                 | 419          | 2                 | 21,281       |
|                     | 2013 | 0                 | 2,430        | 0                 | 578          | 2                 | 27,433       |
|                     | 2014 | 0                 | 3,436        | 0                 | 1,721        | 4                 | 41,595       |
|                     | 2015 | 0                 | 3,746        | 0                 | 1,858        | 4                 | 56,543       |
| 2016                | 0    | 1,429             | 0            | 1,225             | 2            | 24,461            |              |
| Hydrocodone LA      | 2014 | 0                 | 127          | 0                 | 75           | 1                 | 950          |
|                     | 2015 | 0                 | 270          | 0                 | 287          | 2                 | 2,477        |
|                     | 2016 | 0                 | 314          | 0                 | 485          | 2                 | 3,082        |
| Hydrocodone SA      | 2007 | 247               | 80,584       | 493               | 209,611      | 1,559             | 1,003,006    |
|                     | 2008 | 261               | 88,259       | 527               | 245,451      | 1,674             | 1,142,250    |
|                     | 2009 | 265               | 92,749       | 534               | 252,639      | 1,832             | 1,238,006    |
|                     | 2010 | 265               | 95,576       | 554               | 256,194      | 1,867             | 1,243,232    |
|                     | 2011 | 273               | 99,275       | 605               | 281,234      | 1,991             | 1,335,538    |
|                     | 2012 | 265               | 98,347       | 550               | 264,761      | 1,862             | 1,274,250    |
|                     | 2013 | 245               | 93,855       | 535               | 263,222      | 1,774             | 1,229,637    |
|                     | 2014 | 216               | 87,477       | 467               | 235,327      | 1,570             | 1,112,443    |
|                     | 2015 | 164               | 72,932       | 377               | 200,215      | 1,317             | 956,284      |
| 2016                | 155  | 69,814            | 412          | 235,767           | 1,437        | 1,064,551         |              |
| Hydromorphone<br>LA | 2010 | 0                 | 26           | 0                 | 13           | 0                 | 538          |
|                     | 2011 | 0                 | 566          | 0                 | 121          | 2                 | 4,495        |
|                     | 2012 | 0                 | 1,281        | 0                 | 677          | 7                 | 17,458       |
|                     | 2013 | 1                 | 1,691        | 1                 | 1,762        | 14                | 40,454       |
|                     | 2014 | 0                 | 1,436        | 1                 | 1,325        | 13                | 41,157       |
|                     | 2015 | 0                 | 799          | 1                 | 1,514        | 13                | 37,463       |
|                     | 2016 | 0                 | 461          | 1                 | 1,382        | 10                | 29,478       |
| Hydromorphone<br>SA | 2007 | 4                 | 4,454        | 6                 | 5,583        | 46                | 117,181      |
|                     | 2008 | 4                 | 5,228        | 7                 | 7,091        | 54                | 145,460      |
|                     | 2009 | 5                 | 6,306        | 7                 | 8,808        | 68                | 145,185      |
|                     | 2010 | 5                 | 6,566        | 7                 | 8,069        | 69                | 134,774      |
|                     | 2011 | 5                 | 7,093        | 10                | 10,780       | 89                | 176,335      |
|                     | 2012 | 6                 | 7,724        | 11                | 13,686       | 105               | 230,219      |
|                     | 2013 | 5                 | 7,336        | 11                | 14,400       | 111               | 239,966      |
|                     | 2014 | 5                 | 6,815        | 11                | 14,909       | 108               | 228,068      |
| 2015                | 5    | 6,191             | 11           | 13,439            | 114          | 232,407           |              |

| DRUG        |      | Commercial     |              | Aged Medicare  |              | Disabled Medicare |              |
|-------------|------|----------------|--------------|----------------|--------------|-------------------|--------------|
|             |      | Fills per 1000 | MME per 1000 | Fills per 1000 | MME per 1000 | Fills per 1000    | MME per 1000 |
|             |      | person-years   | person-years | person-years   | person-years | person-years      | person-years |
| Levorphanol | 2016 | 4              | 5,833        | 11             | 14,766       | 101               | 204,032      |
|             | 2017 | 0              | 83           | 0              | 404          |                   |              |
|             | 2018 | 0              | 74           | 0              | 220          | 0                 | 312          |
|             | 2019 | 0              | 87           | 0              | 79           | 0                 | 350          |
|             | 2020 | 0              | 23           |                | 13           | 0                 | 141          |
|             | 2021 | 0              | 5            |                | 32           |                   |              |
|             | 2022 | 0              | 74           | 0              | 19           | 0                 | 98           |
|             | 2023 | 0              | 22           | 0              | 56           | 0                 | 364          |
|             | 2024 | 0              | 31           | 0              | 194          | 0                 | 1,354        |
|             | 2025 | 0              | 36           | 0              | 112          | 1                 | 2,354        |
| Meperidine  | 2016 | 0              | 78           | 0              | 92           | 0                 | 941          |
|             | 2017 | 4              | 658          | 1              | 463          | 15                | 5,443        |
|             | 2018 | 4              | 654          | 2              | 464          | 14                | 6,117        |
|             | 2019 | 2              | 457          | 1              | 361          | 14                | 5,673        |
|             | 2020 | 2              | 365          | 2              | 526          | 14                | 5,317        |
|             | 2021 | 2              | 331          | 2              | 518          | 12                | 5,236        |
|             | 2022 | 1              | 286          | 1              | 269          | 5                 | 2,514        |
|             | 2023 | 1              | 215          | 0              | 218          | 4                 | 1,967        |
|             | 2024 | 1              | 156          | 0              | 148          | 3                 | 1,453        |
|             | 2025 | 1              | 129          | 0              | 110          | 2                 | 1,131        |
| Methadone   | 2016 | 1              | 127          | 0              | 90           | 2                 | 1,129        |
|             | 2017 | 5              | 25,566       | 15             | 40,576       | 179               | 1,127,059    |
|             | 2018 | 5              | 26,188       | 16             | 49,494       | 188               | 1,166,232    |
|             | 2019 | 5              | 22,965       | 15             | 50,442       | 195               | 1,120,406    |
|             | 2020 | 5              | 20,554       | 14             | 44,940       | 195               | 1,037,495    |
|             | 2021 | 4              | 18,115       | 14             | 48,339       | 206               | 1,073,560    |
|             | 2022 | 4              | 17,109       | 13             | 44,368       | 193               | 977,358      |
|             | 2023 | 4              | 15,081       | 12             | 41,726       | 174               | 840,877      |
|             | 2024 | 3              | 12,381       | 11             | 36,665       | 152               | 690,877      |
|             | 2025 | 3              | 11,273       | 10             | 31,962       | 139               | 581,916      |
| Morphine LA | 2016 | 3              | 9,239        | 11             | 31,676       | 121               | 484,879      |
|             | 2017 | 5              | 20,811       | 14             | 33,866       | 130               | 685,129      |
|             | 2018 | 6              | 22,546       | 16             | 45,997       | 156               | 864,965      |
|             | 2019 | 6              | 23,767       | 16             | 50,241       | 188               | 920,935      |
|             | 2020 | 6              | 23,593       | 16             | 50,502       | 207               | 935,175      |
|             | 2021 | 7              | 24,086       | 26             | 64,133       | 291               | 1,167,479    |
|             | 2022 | 7              | 24,286       | 25             | 64,257       | 298               | 1,144,315    |
|             | 2023 | 7              | 22,325       | 32             | 77,244       | 336               | 1,243,389    |
|             | 2024 | 7              | 19,392       | 30             | 69,054       | 320               | 1,114,688    |
|             | 2025 | 7              | 20,069       | 30             | 64,537       | 317               | 1,024,298    |
| Morphine SA | 2016 | 9              | 21,585       | 31             | 67,734       | 292               | 858,145      |
|             | 2017 | 3              | 5,541        | 28             | 24,126       | 76                | 184,172      |
|             | 2018 | 3              | 5,788        | 28             | 28,074       | 93                | 226,796      |
|             | 2019 | 3              | 6,480        | 23             | 25,298       | 116               | 261,488      |
|             | 2020 | 4              | 6,391        | 18             | 20,347       | 124               | 251,761      |

| DRUG           |      | Commercial        |              | Aged Medicare     |              | Disabled Medicare |              |
|----------------|------|-------------------|--------------|-------------------|--------------|-------------------|--------------|
|                |      | Fills per<br>1000 | MME per 1000 | Fills per<br>1000 | MME per 1000 | Fills per 1000    | MME per 1000 |
|                |      | person-<br>years  | person-years | person-<br>years  | person-years | person-years      | person-years |
| Opium          | 2011 | 2                 | 4,462        | 11                | 14,492       | 86                | 212,963      |
|                | 2012 | 2                 | 4,413        | 10                | 13,640       | 84                | 210,676      |
|                | 2013 | 2                 | 4,126        | 12                | 15,168       | 83                | 199,621      |
|                | 2014 | 2                 | 3,694        | 12                | 14,764       | 77                | 173,998      |
|                | 2015 | 2                 | 3,467        | 12                | 14,088       | 74                | 162,869      |
|                | 2016 | 2                 | 3,500        | 11                | 18,324       | 65                | 138,973      |
|                | 2007 | 0                 | 171          | 0                 | 122          | 1                 | 420          |
|                | 2008 | 0                 | 137          | 0                 | 136          | 0                 | 306          |
|                | 2009 | 0                 | 155          | 0                 | 102          | 0                 | 268          |
|                | 2010 | 0                 | 202          | 0                 | 79           | 0                 | 351          |
|                | 2011 | 0                 | 215          | 0                 | 144          | 1                 | 1,031        |
|                | 2012 | 0                 | 178          | 0                 | 140          | 0                 | 759          |
|                | 2013 | 0                 | 133          | 0                 | 138          | 1                 | 960          |
|                | 2014 | 0                 | 143          | 0                 | 156          | 1                 | 988          |
|                | 2015 | 0                 | 143          | 0                 | 188          | 1                 | 873          |
|                | 2016 | 0                 | 126          | 0                 | 180          | 1                 | 653          |
| Oxycodone LA   | 2007 | 13                | 63,806       | 42                | 92,115       | 228               | 1,229,679    |
|                | 2008 | 14                | 65,767       | 44                | 109,036      | 265               | 1,609,900    |
|                | 2009 | 14                | 70,534       | 36                | 99,981       | 286               | 1,658,645    |
|                | 2010 | 14                | 69,152       | 34                | 95,712       | 284               | 1,539,340    |
|                | 2011 | 12                | 52,764       | 33                | 91,431       | 260               | 1,383,379    |
|                | 2012 | 11                | 47,066       | 31                | 88,640       | 257               | 1,350,406    |
|                | 2013 | 10                | 40,156       | 17                | 45,461       | 119               | 628,584      |
|                | 2014 | 9                 | 33,711       | 16                | 41,724       | 117               | 564,549      |
|                | 2015 | 6                 | 23,432       | 16                | 42,509       | 122               | 553,224      |
|                | 2016 | 4                 | 14,858       | 14                | 39,986       | 97                | 410,419      |
| Oxycodone SA   | 2007 | 80                | 61,398       | 157               | 111,647      | 667               | 1,069,792    |
|                | 2008 | 86                | 73,379       | 181               | 152,801      | 851               | 1,601,017    |
|                | 2009 | 90                | 83,482       | 171               | 156,450      | 931               | 1,770,162    |
|                | 2010 | 94                | 98,227       | 176               | 173,212      | 1,023             | 2,076,656    |
|                | 2011 | 96                | 103,431      | 205               | 218,837      | 1,235             | 2,722,149    |
|                | 2012 | 95                | 99,620       | 210               | 237,311      | 1,305             | 2,880,710    |
|                | 2013 | 90                | 92,672       | 220               | 247,600      | 1,314             | 2,763,716    |
|                | 2014 | 87                | 85,831       | 211               | 235,189      | 1,294             | 2,603,569    |
|                | 2015 | 91                | 89,636       | 215               | 241,232      | 1,364             | 2,662,560    |
|                | 2016 | 90                | 93,317       | 222               | 265,613      | 1,320             | 2,531,111    |
| Oxymorphone LA | 2007 | 1                 | 2,492        | 0                 | 1,429        | 5                 | 22,158       |
|                | 2008 | 1                 | 4,918        | 1                 | 2,875        | 14                | 85,751       |
|                | 2009 | 1                 | 6,543        | 1                 | 3,772        | 22                | 123,145      |
|                | 2010 | 2                 | 9,150        | 1                 | 4,687        | 28                | 140,687      |
|                | 2011 | 2                 | 12,944       | 2                 | 10,509       | 57                | 332,336      |
|                | 2012 | 2                 | 10,356       | 2                 | 10,322       | 53                | 306,114      |
|                | 2013 | 2                 | 9,215        | 5                 | 19,262       | 86                | 475,849      |
|                | 2014 | 2                 | 7,759        | 5                 | 18,182       | 78                | 418,686      |
|                | 2015 | 2                 | 7,939        | 4                 | 14,828       | 66                | 335,821      |
|                | 2016 | 2                 | 8,019        | 4                 | 15,205       | 59                | 271,863      |

| DRUG           |               | Commercial                  |                           | Aged Medicare               |                           | Disabled Medicare           |                           |        |
|----------------|---------------|-----------------------------|---------------------------|-----------------------------|---------------------------|-----------------------------|---------------------------|--------|
|                |               | Fills per 1000 person-years | MME per 1000 person-years | Fills per 1000 person-years | MME per 1000 person-years | Fills per 1000 person-years | MME per 1000 person-years |        |
|                |               |                             |                           |                             |                           |                             |                           |        |
| Oxymorphone SA | 2007          | 0                           | 499                       | 0                           | 77                        | 2                           | 5,199                     |        |
|                | 2008          | 0                           | 752                       | 0                           | 280                       | 5                           | 13,116                    |        |
|                | 2009          | 0                           | 1,237                     | 0                           | 474                       | 7                           | 19,120                    |        |
|                | 2010          | 0                           | 1,424                     | 0                           | 352                       | 6                           | 16,058                    |        |
|                | 2011          | 1                           | 1,653                     | 0                           | 821                       | 12                          | 31,181                    |        |
|                | 2012          | 0                           | 1,235                     | 0                           | 792                       | 9                           | 24,205                    |        |
|                | 2013          | 0                           | 1,309                     | 1                           | 1,539                     | 14                          | 38,760                    |        |
|                | 2014          | 0                           | 1,311                     | 1                           | 1,694                     | 16                          | 43,687                    |        |
|                | 2015          | 0                           | 1,359                     | 1                           | 1,648                     | 14                          | 36,673                    |        |
|                | 2016          | 1                           | 1,375                     | 1                           | 1,495                     | 8                           | 21,818                    |        |
| Pentazocine    | 2007          | 1                           | 775                       | 1                           | 2,446                     | 10                          | 11,963                    |        |
|                | 2008          | 1                           | 622                       | 1                           | 2,288                     | 8                           | 10,513                    |        |
|                | 2009          | 0                           | 508                       | 1                           | 1,279                     | 6                           | 9,416                     |        |
|                | 2010          | 0                           | 484                       | 1                           | 1,089                     | 5                           | 7,848                     |        |
|                | 2011          | 1                           | 653                       | 1                           | 1,421                     | 6                           | 10,874                    |        |
|                | 2012          | 1                           | 550                       | 1                           | 802                       | 2                           | 4,507                     |        |
|                | 2013          | 0                           | 460                       | 0                           | 661                       | 2                           | 3,637                     |        |
|                | 2014          | 0                           | 336                       | 0                           | 375                       | 1                           | 2,733                     |        |
|                | 2015          | 0                           | 340                       | 0                           | 245                       | 1                           | 1,997                     |        |
| Propoxyphene   | 2007          | 42                          | 28,305                    | 81                          | 82,417                    | 138                         | 145,304                   |        |
|                | 2008          | 42                          | 28,227                    | 79                          | 87,972                    | 140                         | 170,497                   |        |
|                | 2009          | 37                          | 25,884                    | 79                          | 85,099                    | 155                         | 180,274                   |        |
|                | 2010          | 32                          | 22,627                    | 126                         | 122,415                   | 201                         | 214,300                   |        |
|                | 2011          | 0                           | 3                         | 0                           | 27                        |                             | 32                        |        |
|                | Tapentadol LA | 2011                        | 0                         | 43                          | 0                         | 17                          | 0                         | 362    |
|                |               | 2012                        | 0                         | 1,427                       | 0                         | 1,060                       | 4                         | 13,459 |
|                |               | 2013                        | 1                         | 2,483                       | 1                         | 2,519                       | 10                        | 31,675 |
| 2014           |               | 1                           | 2,298                     | 1                           | 2,859                     | 10                          | 33,178                    |        |
| 2015           |               | 1                           | 2,575                     | 1                           | 3,010                     | 13                          | 41,789                    |        |
| 2016           |               | 1                           | 2,983                     | 2                           | 4,584                     | 19                          | 57,518                    |        |
| Tapentadol SA  | 2009          | 0                           | 667                       | 0                           | 219                       | 2                           | 3,520                     |        |
|                | 2010          | 1                           | 3,189                     | 0                           | 660                       | 4                           | 9,303                     |        |
|                | 2011          | 3                           | 5,381                     | 1                           | 1,414                     | 6                           | 16,771                    |        |
|                | 2012          | 2                           | 5,489                     | 1                           | 1,847                     | 8                           | 23,232                    |        |
|                | 2013          | 2                           | 4,563                     | 1                           | 1,737                     | 8                           | 23,607                    |        |
|                | 2014          | 1                           | 3,747                     | 1                           | 1,827                     | 8                           | 24,526                    |        |
|                | 2015          | 1                           | 3,522                     | 1                           | 2,223                     | 9                           | 26,866                    |        |
|                | 2016          | 1                           | 3,584                     | 1                           | 2,310                     | 8                           | 23,442                    |        |
| Tramadol LA    | 2007          | 3                           | 1,561                     | 5                           | 2,590                     | 15                          | 10,116                    |        |
|                | 2008          | 3                           | 1,917                     | 6                           | 3,958                     | 20                          | 16,279                    |        |
|                | 2009          | 3                           | 1,771                     | 4                           | 2,976                     | 17                          | 13,184                    |        |
|                | 2010          | 2                           | 1,488                     | 3                           | 1,543                     | 8                           | 5,707                     |        |
|                | 2011          | 2                           | 1,282                     | 3                           | 1,747                     | 11                          | 6,924                     |        |
|                | 2012          | 2                           | 1,193                     | 3                           | 1,581                     | 11                          | 7,760                     |        |
|                | 2013          | 2                           | 1,158                     | 3                           | 1,721                     | 13                          | 9,032                     |        |

| DRUG        |      | Commercial        |              | Aged Medicare     |              | Disabled Medicare |              |
|-------------|------|-------------------|--------------|-------------------|--------------|-------------------|--------------|
|             |      | Fills per<br>1000 | MME per 1000 | Fills per<br>1000 | MME per 1000 | Fills per 1000    | MME per 1000 |
|             |      | person-<br>years  | person-years | person-<br>years  | person-years | person-years      | person-years |
|             | 2014 | 2                 | 1,090        | 3                 | 1,978        | 11                | 8,977        |
|             | 2015 | 2                 | 1,027        | 3                 | 1,946        | 11                | 7,186        |
|             | 2016 | 2                 | 975          | 3                 | 1,966        | 11                | 6,994        |
| Tramadol SA | 2007 | 43                | 14,429       | 167               | 64,784       | 305               | 147,065      |
|             | 2008 | 47                | 16,426       | 182               | 77,634       | 343               | 172,763      |
|             | 2009 | 49                | 18,562       | 178               | 77,785       | 389               | 198,143      |
|             | 2010 | 51                | 19,884       | 189               | 80,028       | 413               | 208,391      |
|             | 2011 | 63                | 23,523       | 250               | 103,644      | 508               | 254,211      |
|             | 2012 | 67                | 25,036       | 251               | 105,696      | 521               | 260,345      |
|             | 2013 | 69                | 25,817       | 269               | 113,696      | 546               | 272,425      |
|             | 2014 | 68                | 25,381       | 266               | 109,957      | 539               | 260,854      |
|             | 2015 | 69                | 24,518       | 257               | 103,494      | 500               | 235,815      |
|             | 2016 | 69                | 26,230       | 288               | 115,705      | 571               | 261,512      |

**Appendix 10:** Time trends in concentration of opioid use by use percentiles

**Figure A7: Trends in opioid use concentration: Commercial population.** Lines represent a percentile of opioid use; for example, the darkest/lowest line p0.01 represents the top 1 percent of all opioid users. To interpret: in 2007, the top 1 percent of opioid users accounted for 45% of all opioids used by volume (MME). The top 5 percent used 74% of all opioids, etc.

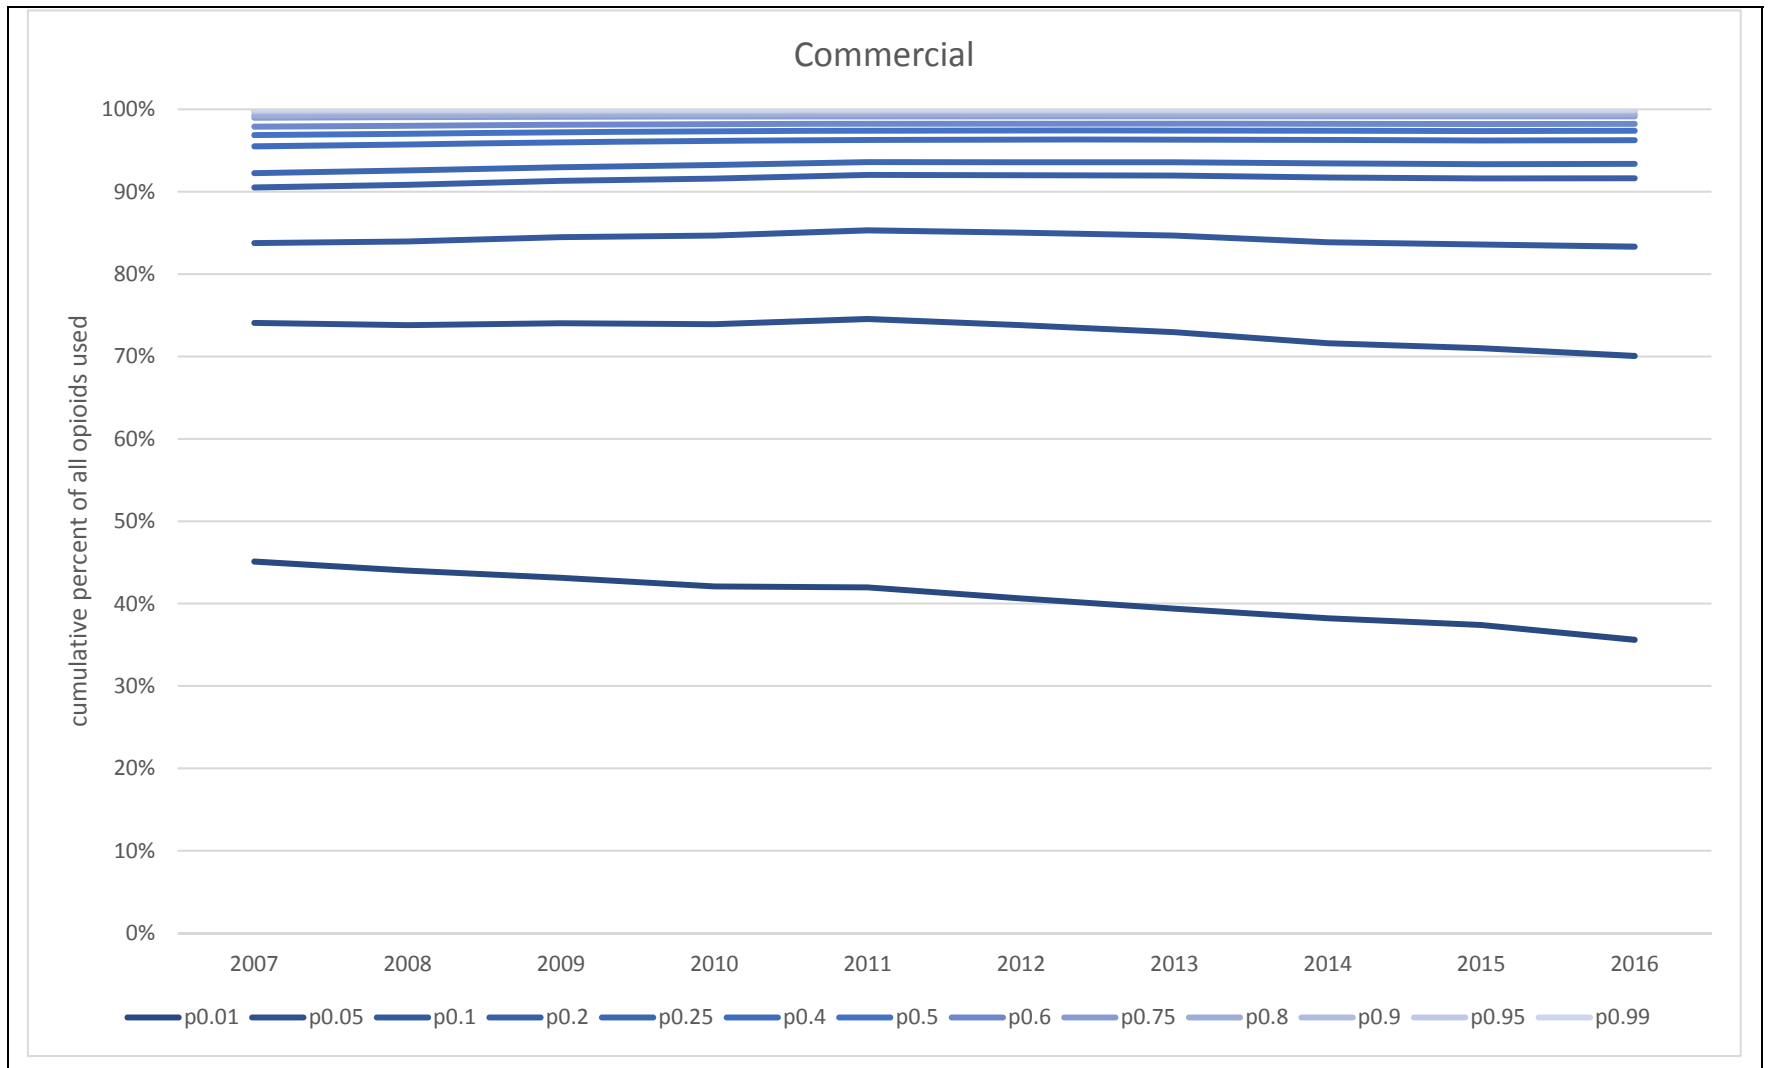



**Figure A8 Trends in opioid use concentration: Aged Medicare population.** Lines represent a percentile of opioid use; for example, the darkest/lowest line p0.01 represents the top 1 percent of all opioid users. To interpret: in 2007, the top 1 percent of opioid users accounted for 25% of all opioids used by volume (MME). The top 5 percent used 53% of all opioids, etc.

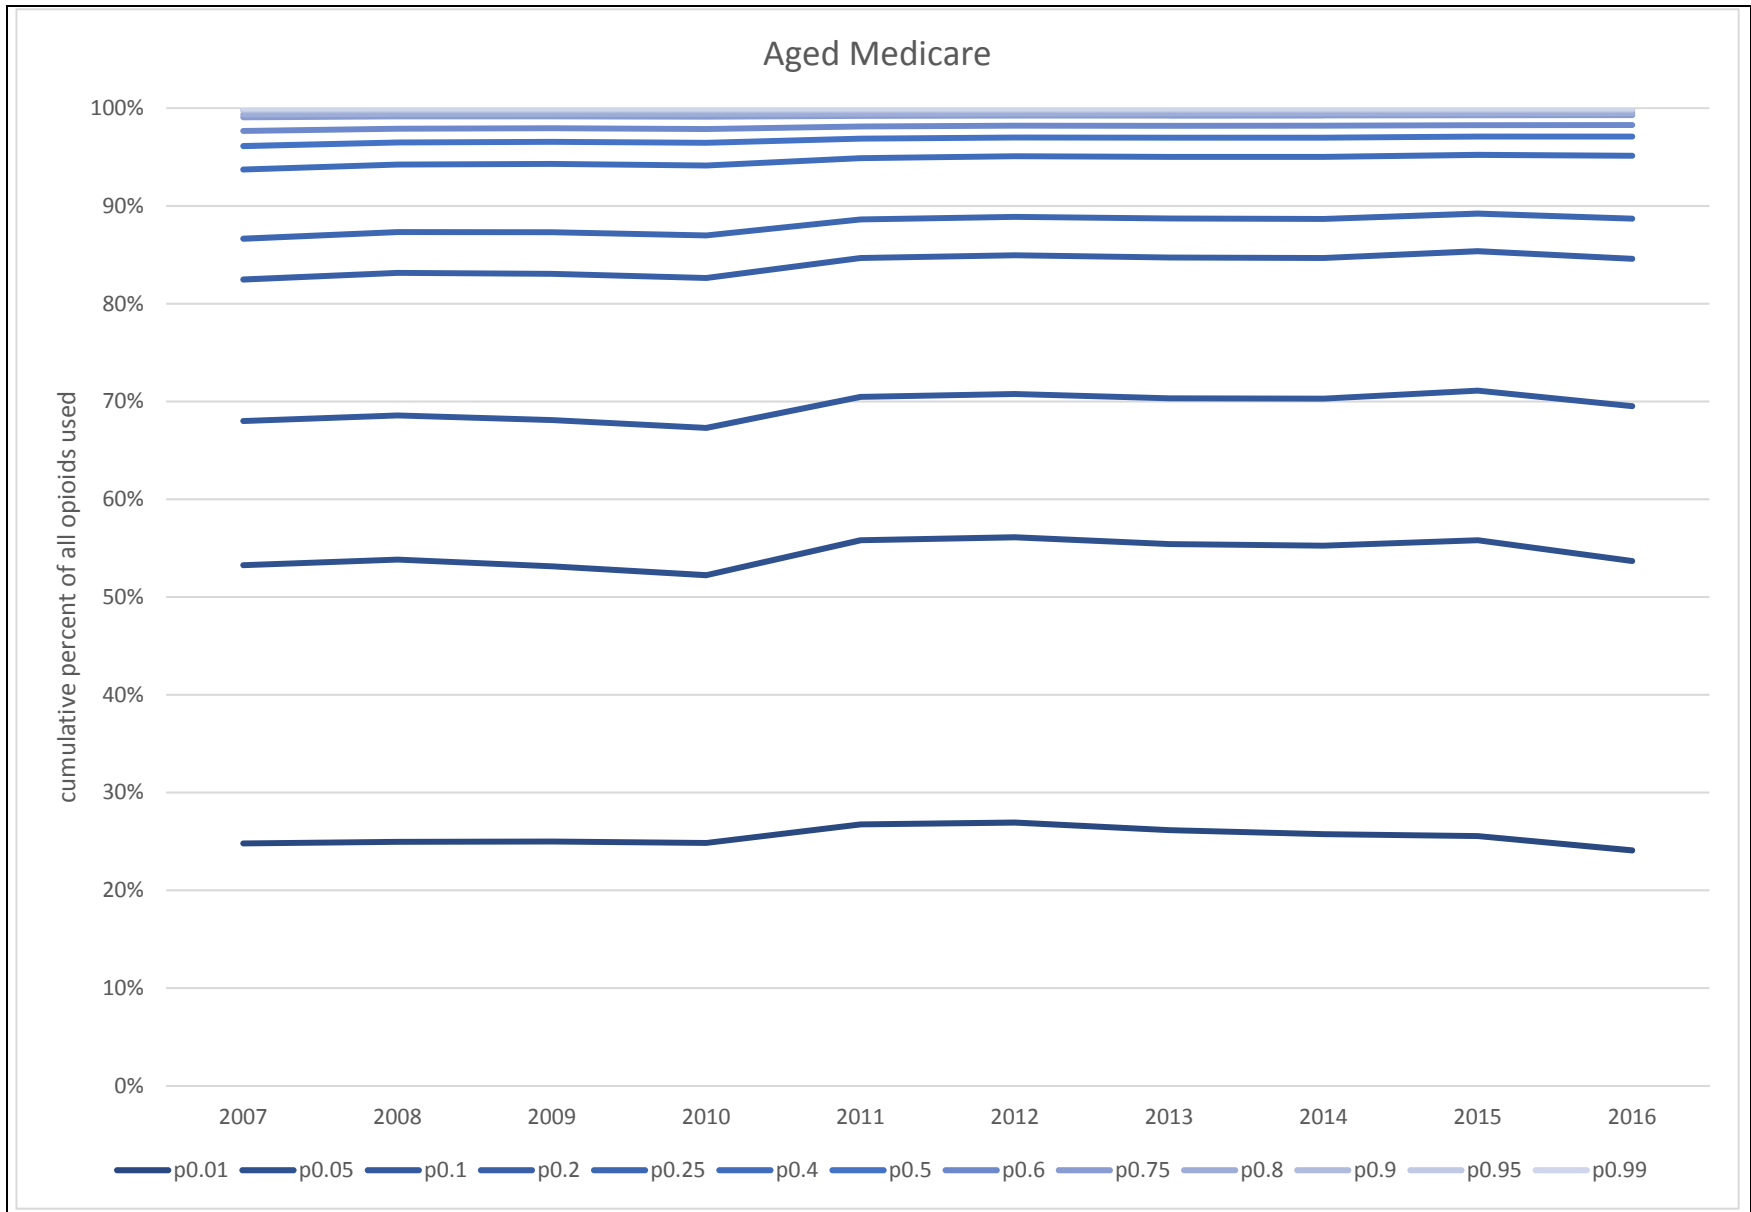



**Figure A9 Trends in opioid use concentration: Disabled Medicare population.** Lines represent a percentile of opioid use; for example, the darkest/lowest line p0.01 represents the top 1 percent of all opioid users. To interpret: in 2007, the top 1 percent of opioid users accounted for 19% of all opioids used by volume (MME). The top 5 percent used 49% of all opioids, etc.

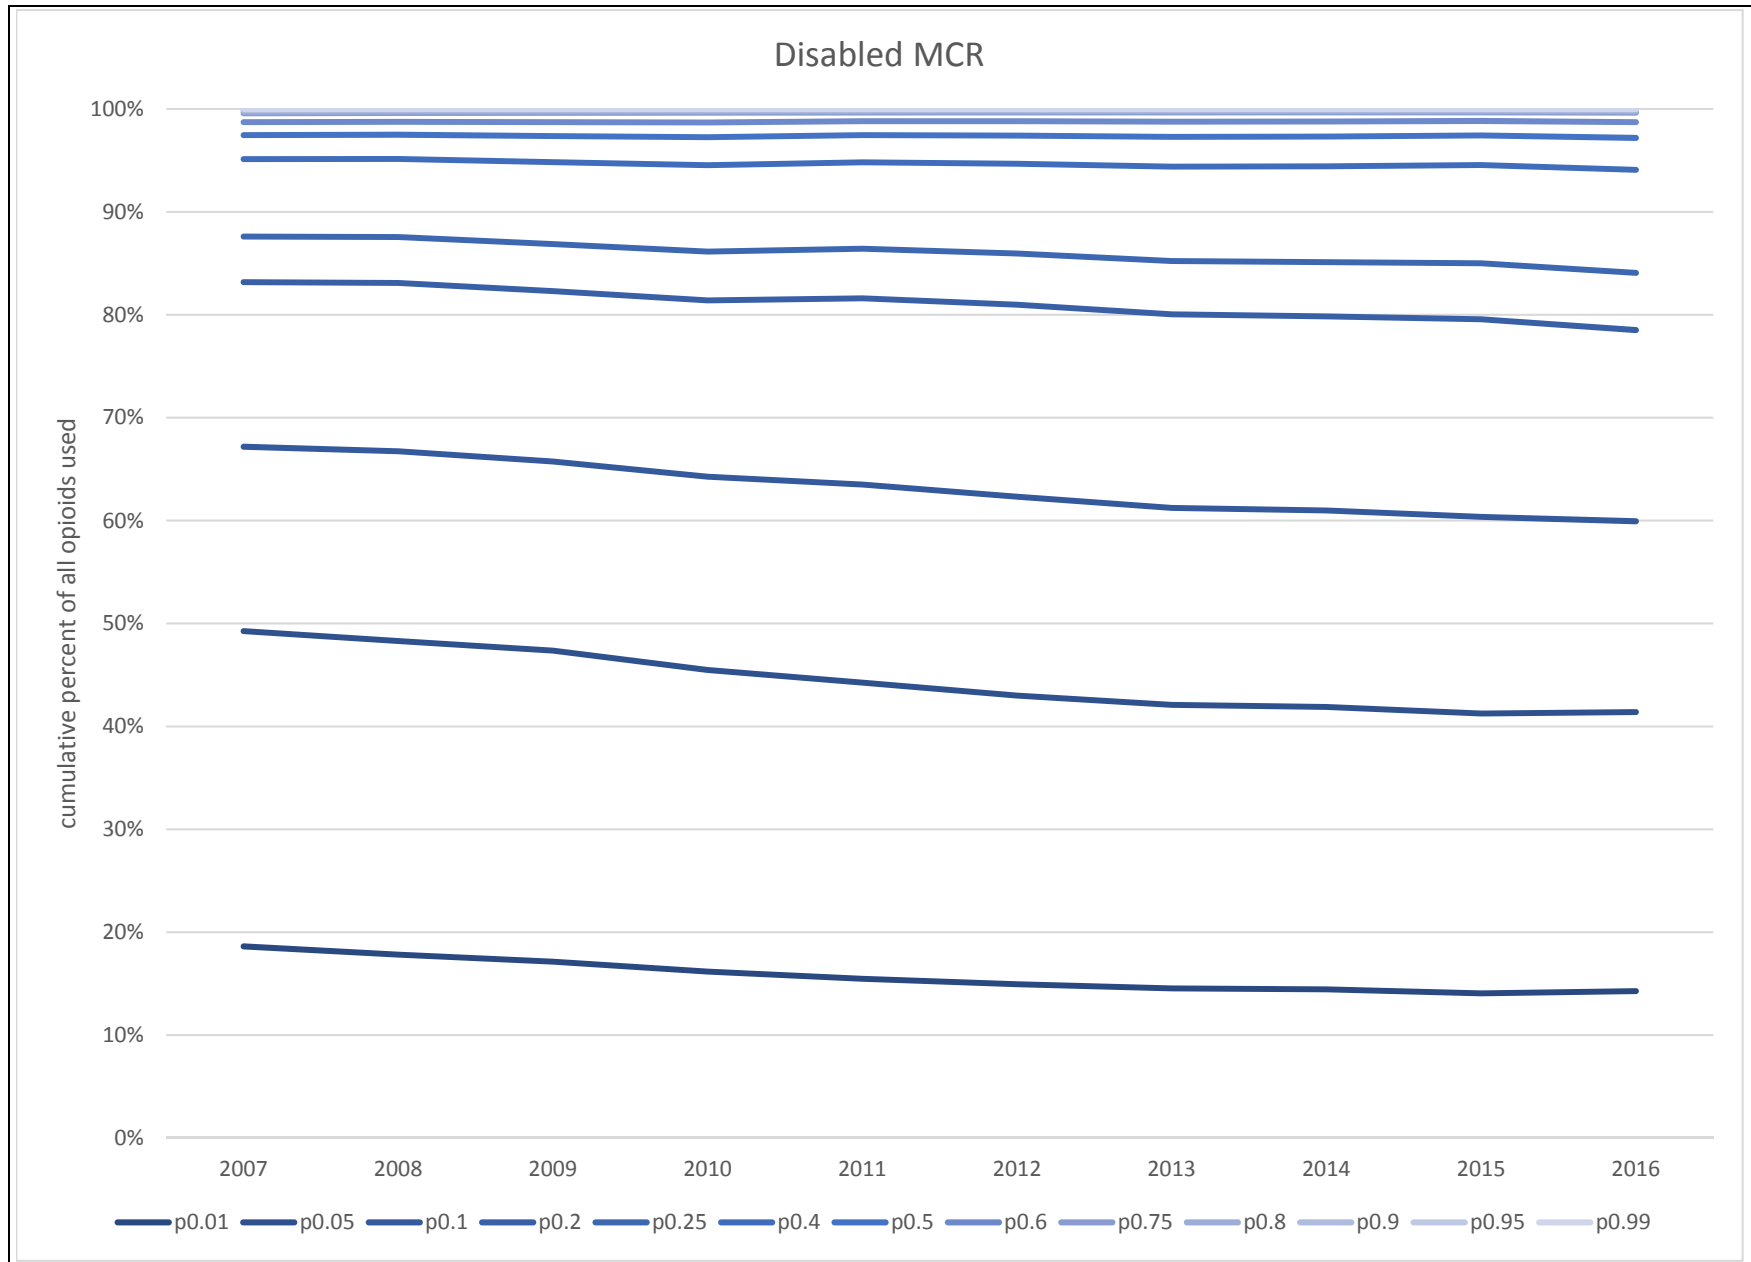

## References

1. National Center for Injury Prevention and Control. CDC compilation of opioid analgesic formulations with morphine milligram equivalent conversion factors, 2015 version. 2015;  
[http://www.pdmpassist.org/pdf/BJA\\_performance\\_measure\\_aid\\_MME\\_conversion.pdf](http://www.pdmpassist.org/pdf/BJA_performance_measure_aid_MME_conversion.pdf).
2. AHFS. Propoxyphene Hydrochloride. n.d.;  
<https://www.drugs.com/monograph/propoxyphene-hydrochloride.html>. Accessed 10/10/2017.
3. Quan H, Sundararajan V, Halfon P, et al. Coding algorithms for defining comorbidities in ICD-9-CM and ICD-10 administrative data. *Medical care*. 2005;43(11):1130-1139.
